# Supplementary material for: Patient journey following lumbar spinal fusion surgery (FuJourn): A multicentre exploration of the immediate post-operative period using qualitative patient diaries
Source: PubMed Central journal article supplement (PMC7707593; doi:10.1371/journal.pone.0241931), 2020-12-01
Supplement: pone.0241931.s001.pdf [file pone.0241931.s001.pdf]

**S1 Appendix: Sample diary**

**Patient Diary for week ending: Sunday \_\_ / \_\_ / \_\_**

**Participant number:**

**The diary aims to record your journey following your spinal surgery by tracking your experiences on a weekly basis. The diary is broken down into a number of sections. These sections are intended to act as a prompt in helping you to record how you have felt and what you have experienced during the past week. Please respond freely and honestly as there are no right or wrong answers. If a section is not relevant to you this week, please move onto the next prompt.**

| <i>Prompt</i>                                    | <i>Diary entry</i> |
|--------------------------------------------------|--------------------|
| Feelings about your progress this week           |                    |
| Feelings about your recovery so far              |                    |
| Level of motivation                              |                    |
| Symptoms you have experienced over the past week |                    |
| Medications you have taken this week             |                    |
| Healthcare appointments this week                |                    |

|                                                                                                                                                                                                                     |  |
|---------------------------------------------------------------------------------------------------------------------------------------------------------------------------------------------------------------------|--|
| <p>Rehabilitation progress this week</p> <ul style="list-style-type: none"> <li>- Your ability to exercise and do activity this week</li> <li>- Return to work / activities / hobbies as relevant to you</li> </ul> |  |
| <p>Positive thought(s) this week</p>                                                                                                                                                                                |  |
| <p>Negative thought(s) this week</p>                                                                                                                                                                                |  |
| <p>Most significant/memorable moment this week<br/>(may be positive or negative)</p>                                                                                                                                |  |
| <p>Please describe how this week has been compared to last week</p>                                                                                                                                                 |  |

Please record any other comments you would like to make regarding how you have felt or your experiences over the past week?

**Thank you for your completing the diary this week – your help is very much appreciated.**
