# Supplementary material for: Patient journey following lumbar spinal fusion surgery (FuJourn): A multicentre exploration of the immediate post-operative period using qualitative patient diaries
Source: PubMed Central journal article supplement (PMC7707593; doi:10.1371/journal.pone.0241931), 2020-12-01
Supplement: pone.0241931.s002.pdf [file pone.0241931.s002.pdf]

## S2 Appendix: Description of themes

### Diary entry: P1

| Participant: P1<br>Prompt                               | Entry                                                                                         |                                                                                                                                                 |                                                                                                                                                                  |                                                                                                | Categories/Themes                    |                                            |                                    |                                                  |
|---------------------------------------------------------|-----------------------------------------------------------------------------------------------|-------------------------------------------------------------------------------------------------------------------------------------------------|------------------------------------------------------------------------------------------------------------------------------------------------------------------|------------------------------------------------------------------------------------------------|--------------------------------------|--------------------------------------------|------------------------------------|--------------------------------------------------|
|                                                         | Week 1                                                                                        | Week 2                                                                                                                                          | Week 3                                                                                                                                                           | Summary                                                                                        | Week 1                               | Week 2                                     | Week 3                             | Combined themes                                  |
| <i>Feelings about your progress this week</i>           | Good progress until Friday evening then bit of a rough weekend                                | Really mixed week in terms of progress. It changes from hour to hour but is moving in the right direction                                       | I feel mainly positive about this week's progress                                                                                                                | Good progress, mixed week in terms of progress but remaining positive                          | Fatigue<br>Energy (less)             | Positive<br>Movement (+)                   | Uplifted<br>Positive<br>Motivation | Positive<br>Motivation<br>Energised (+)          |
| <i>Feelings about your recovery so far</i>              | Probably better recovery so far in general than I had expected                                | I am now walking around without crutches with the exception of stairs                                                                           | I think I'm far better than I expected to be at this stage                                                                                                       | Better recovery than expected, walking unaided                                                 | Empowerment<br>Control<br>Meaningful | Control (+)<br>Satisfying (+)<br>Regaining | Belief<br>Control (+)<br>Hope (+)  | Control (+)<br>Empowerment<br>Belief<br>Hope (+) |
| <i>Level of motivation</i>                              | I was really motivated to leave hospital asap which in hindsight was a little bit to early    | I am now walking around without crutches with the exception of stairs                                                                           | Mainly good... I have started looking forward to getting back into some sort of exercise in the future                                                           | Walking unaided with the exception of stairs, contemplate taking up some exercise              | Drive<br>Incentive (+)<br>Hasty      | Control (+)<br>Self-belief<br>Limitation   | Self-efficacy<br>Positive          | Self-efficacy<br>Positive<br>Control<br>Drive    |
| <i>Symptoms you have experienced over the past week</i> | Nothing unexpected really .... some pain, a pressure sore on my lower back/bottom, tiredness. | I have had chills and sweats, severe pain and tiredness at times through the week but also good moments. I have also had sciatic pain in my leg | I have had quite a bit of leg pain (sciatic) this week, and also pain in the left side of my groin. The groin pain could be because of the bone graft I suppose. | Experienced some leg pain sometimes severe associated with bone graft and potentially sciatica | Physical<br>Mood                     | Pain<br>Physical<br>Sustained              | Pain<br>Symptoms<br>Fatigue        | Pain<br>Physical<br>Fatigue<br>Symptoms          |
| <i>Medications you have taken this week</i>             | 200mg Sertraline.                                                                             | 200mg Sertraline.                                                                                                                               | 200mg Sertraline.                                                                                                                                                | Adherence to prescriptions                                                                     | Adherence<br>Awareness               | Adherence<br>Awareness                     | Adherence<br>Awareness             | Adherence<br>Awareness                           |

| <b>Participant: P1</b>                                                                                                                                                     | <b>Entry</b>                                                                                                                                                                                                                                                                                       |                                                                                                                                    |                                                                                   |                                                                               | <b>Categories/Themes</b>     |                                      |                                       |                                                |
|----------------------------------------------------------------------------------------------------------------------------------------------------------------------------|----------------------------------------------------------------------------------------------------------------------------------------------------------------------------------------------------------------------------------------------------------------------------------------------------|------------------------------------------------------------------------------------------------------------------------------------|-----------------------------------------------------------------------------------|-------------------------------------------------------------------------------|------------------------------|--------------------------------------|---------------------------------------|------------------------------------------------|
| <b>Prompt</b>                                                                                                                                                              | <b>Week 1</b>                                                                                                                                                                                                                                                                                      | <b>Week 2</b>                                                                                                                      | <b>Week 3</b>                                                                     | <b>Summary</b>                                                                | <b>Week 1</b>                | <b>Week 2</b>                        | <b>Week 3</b>                         | <b>Combined themes</b>                         |
|                                                                                                                                                                            | 2,700mg Gabapentin. 240mg codeine. Paracetamol x ? Morphine x ? and 25mg amitriptyline PER DAY                                                                                                                                                                                                     | 2,700mg Gabapentin. 240mg codeine. Paracetamol x ? and 25mg amitriptyline PER DAY                                                  | 2,700mg Gabapentin. 240mg codeine. Paracetamol x ? and 25mg amitriptyline PER DAY |                                                                               |                              |                                      |                                       |                                                |
| <i>Healthcare appointments this week</i>                                                                                                                                   | In hospital until Friday evening                                                                                                                                                                                                                                                                   | District nurse came out to dress a pressure sore on my lower back/bottom                                                           | none                                                                              | Adequate access to health care professionals                                  | Awareness Adherence          | Access Symptoms                      | None                                  | Awareness Access Adherence                     |
| <i>Rehabilitation progress this week</i><br>- <i>Your ability to exercise and do activity this week</i><br><i>Return to work / activities / hobbies as relevant to you</i> | I managed to use a walking frame to walk a few yards on 11th Oct. and walked down the corridor and a few steps using crutches on 12th. On 13th & 14th I was at home were although I felt I had left hospital a bit early I did manage to get around the house and use the stairs using my crutches | I am able to get around easier as the week has progressed and I have been for a couple of short walks approximately 500metres long | I have hardly used my crutches this week                                          | Able to get around easier with minimal reliance on crutches and walking frame | Positive (+) Self-motivation | Belief Self-motivation Self-efficacy | Belief Self-efficacy Uplifted Control | Self-efficacy Control Self-motivation Uplifted |
| <i>Positive thought(s) this week</i>                                                                                                                                       | After speaking to my surgeon, I believe my back will be better                                                                                                                                                                                                                                     | I am looking forward to being able to play with my children again                                                                  | I sometimes think I'm going to make a full recovery with no back pain             | Belief that back pain will improve and potentially                            | Belief Positive (+)          | Motivation Goal Ability              | Belief (+) Goal Motivation            | Belief Positive Goal Motivation                |

| Participant: P1                                                                                                                  | Entry                                                                                      |                                                                                                                              |                                                                                                  |                                                                                                                        | Categories/Themes      |                                          |                               |                                         |
|----------------------------------------------------------------------------------------------------------------------------------|--------------------------------------------------------------------------------------------|------------------------------------------------------------------------------------------------------------------------------|--------------------------------------------------------------------------------------------------|------------------------------------------------------------------------------------------------------------------------|------------------------|------------------------------------------|-------------------------------|-----------------------------------------|
| Prompt                                                                                                                           | Week 1                                                                                     | Week 2                                                                                                                       | Week 3                                                                                           | Summary                                                                                                                | Week 1                 | Week 2                                   | Week 3                        | Combined themes                         |
|                                                                                                                                  | than it was before.                                                                        |                                                                                                                              |                                                                                                  | making a full recovery                                                                                                 |                        |                                          |                               |                                         |
| <i>Negative thought(s) this week</i>                                                                                             | I can't think of a negative thought I had this week to be honest.                          | When the pain gets bad I do sometimes wonder if it's going to get better but in general more positive than negative thoughts | sometimes think I'm not going to make a full recovery and I'm still going to have a back problem | Belief that recovery may not be attainable but staying positive nevertheless                                           | Mood<br>Self-control   | Mood<br>Self-belief                      | Belief (-)<br>Anxiety         | Belief<br>Anxiety                       |
| <i>Most significant/memorable moment this week (may be positive or negative)</i>                                                 | On 12th walking with crutches down the corridor and up/down a few stairs felt really good. | Walking around the ground floor of the house without crutches                                                                | Had some really strong pain in legs this week                                                    | Positive attitude and progress with movement starting with crutches down corridor followed by walking without crutches | Self-control<br>Belief | Belief<br>Control<br>Speed               | Anxiety                       | Control<br>Belief<br>Emotion            |
| <i>Please describe how this week has been compared to last week</i>                                                              | On 12th walking with crutches down the corridor and up/down a few stairs felt really good. | Much better than last week in all areas                                                                                      | Definitely getting easier to get around the house                                                | Generally good progress with movement                                                                                  | Self-control<br>Belief | Control<br>Satisfaction<br>Self-efficacy | Control<br>Belief<br>Movement | Self-efficacy<br>Belief<br>Satisfaction |
| <i>Please record any other comments you may like to make regarding how you have felt or your experiences over the past week?</i> | I think I made good progress but maybe should have stayed in hospital for a day or 2 more. | No data recorded                                                                                                             | No data recorded                                                                                 | Good progress but recognise the need to allow time to recover adequately                                               |                        |                                          |                               | Positive                                |

## Diary entry: P2

| Participant: P2                                         | Entry                                                                  |                                                                                                                                                         |                                                                                                             |                                                                              |                                                                                                | Categories/Themes     |                            |                              |                        |                                     |
|---------------------------------------------------------|------------------------------------------------------------------------|---------------------------------------------------------------------------------------------------------------------------------------------------------|-------------------------------------------------------------------------------------------------------------|------------------------------------------------------------------------------|------------------------------------------------------------------------------------------------|-----------------------|----------------------------|------------------------------|------------------------|-------------------------------------|
| Prompt                                                  | Week 1                                                                 | Week 2                                                                                                                                                  | Week 3                                                                                                      | Week 4                                                                       | Summary                                                                                        | Week 1                | Week 2                     | Week 3                       | Week 4                 | Combined themes                     |
| <i>Feelings about your progress this week</i>           | Came home Friday night slept very tired. Sat I was ok, improved Sunday | I feel I have progressed slightly better. I can move around the house well with crutches sometime without crutches, but muscles hurt when I do too much | I am really chuffed this week. I feel I have improved 80%                                                   | Very happy with progress                                                     | Felt significant improvement in movement but painful when overdoing                            | Energy (-)<br>Fatigue | Energy (+)<br>Movement (-) | Speed (+)                    | Speed<br>Energy        | Energised<br>Speed<br>Fatigue       |
| <i>Feelings about your recovery so far</i>              | I feel ok. I know I have to take it slow                               | It's slow recovery, I miss walking with my dogs, but they are staying close by. Trying not to get frustrated                                            | So far so good, I still have good days and bad days more goal/excellent today. But had one awful day.       | Still having good and bad times. I'm getting frustrated that I can't do more | Slow recovering, aware that it is a lengthy process. Frustrated about reduce physical activity | Awareness             | Frustration                | Frustration<br>Anxiety       | Frustration<br>Anxiety | Frustration<br>Anxiety<br>Awareness |
| <i>Level of motivation</i>                              | Good level                                                             | I have ups and downs moments as I know not to get down too much                                                                                         | Very motivated this week started week with one crutch now no crutches. 10 for motivation 1 big bid 10 goals | Good level I'm enjoying walking even in the rain                             | Reasonable level of motivation. Setting out goals                                              | Positive (+)          | Speed (-)                  | Energy (+)<br>Motivation (+) | Energy<br>Movement     | Motivation<br>Speed<br>Energy       |
| <i>Symptoms you have experienced over the past week</i> | Graft site pain numbness of left thigh.                                | Stinging each down left leg. Bladder hurting                                                                                                            | Ache in back but for muscles still left leg ache                                                            | Ache in my back this week and tightness                                      | Mostly back and left leg aches. Tightness                                                      | Pain<br>Anxiety       | Pain                       | Pain                         | Pain                   | Pain<br>Anxiety                     |

| Participant: P2                                                                                                                                                            | Entry                                                                    |                                                               |                                                                                                                                                                                                |                                                                                           |                                                                            | Categories/Themes        |                 |                              |                              |                                                          |
|----------------------------------------------------------------------------------------------------------------------------------------------------------------------------|--------------------------------------------------------------------------|---------------------------------------------------------------|------------------------------------------------------------------------------------------------------------------------------------------------------------------------------------------------|-------------------------------------------------------------------------------------------|----------------------------------------------------------------------------|--------------------------|-----------------|------------------------------|------------------------------|----------------------------------------------------------|
| Prompt                                                                                                                                                                     | Week 1                                                                   | Week 2                                                        | Week 3                                                                                                                                                                                         | Week 4                                                                                    | Summary                                                                    | Week 1                   | Week 2          | Week 3                       | Week 4                       | Combined themes                                          |
|                                                                                                                                                                            | One shooting pain down left foot on Saturday night. Not doing very well. | alternating (muscles nerve repair)                            | and more pain numb over left quad                                                                                                                                                              | around stomach incision side leg pain                                                     | around incision site                                                       |                          |                 |                              |                              |                                                          |
| <i>Medications you have taken this week</i>                                                                                                                                | Oral morphine, paracetamol, ibuprofen, lacxillo, cycline                 | Oral morphine, pregan, 75 mg paracetamol, ibuprofen, diazepam | Pregance 150mg for leg symptoms, paracetamol;l 4x a day ibuprofen x3 oral morphine twice before bed this week                                                                                  | Paracetamol, ibuprofen, pregnv twice or more at night diazepam to help sleep and leg pain | Appears to be taking medication dependent on the level of pain experienced | Threshold                | Pain            | Pain Sleep                   | Pain Sleep                   | Pain Sleep<br><b>Dependent on pain and sleep pattern</b> |
| <i>Healthcare appointments this week</i>                                                                                                                                   | None                                                                     | None                                                          | Monday 26 <sup>th</sup> sutures out nice to see them gone                                                                                                                                      | None                                                                                      | Limited access to healthcare                                               | None                     | None            | Positive                     | None                         | Positive Minimal                                         |
| <i>Rehabilitation progress this week</i><br>- <i>Your ability to exercise and do activity this week</i><br><i>Return to work / activities / hobbies as relevant to you</i> | Stairs and walk around house very slowly, not a lot at once              | Crutches around house                                         | Walked to the supermarket on Thursday with parents. 2xwalk 10 mins, Friday, Sat, Sun stairs on won as walking normally. Bend down using legs not back to pick up crutch I dropped body upright | Walk twice a day need to stand up a lot this week. Did some drawing                       | Improved movement. More stamina and well enough to take up a hobby.        | Energy (-)<br>Motivation | Energy Movement | Speed Movement<br>Energy (+) | Energy Motivation<br>Stamina | Energy Motivation<br>Stamina                             |
| <i>Positive thought(s) this week</i>                                                                                                                                       | Mostly all positive                                                      | Bowels moving again. Losing                                   | Good to see sutures gone nice visually. Good to go                                                                                                                                             | Improving walking well                                                                    | Weight loss, skin visually good/. Improved                                 | Positive                 | Anxious         | Positive                     | Energy (+)                   | Positive Anxiety<br>Energy                               |

| Participant: P2                                                                                                                  | Entry                                                                                                          |                                                                                                                                                          |                                                                                                                                                                  |                                                                                                                                              |                                                                                           | Categories/Themes |                          |                        |                   |                                         |
|----------------------------------------------------------------------------------------------------------------------------------|----------------------------------------------------------------------------------------------------------------|----------------------------------------------------------------------------------------------------------------------------------------------------------|------------------------------------------------------------------------------------------------------------------------------------------------------------------|----------------------------------------------------------------------------------------------------------------------------------------------|-------------------------------------------------------------------------------------------|-------------------|--------------------------|------------------------|-------------------|-----------------------------------------|
| Prompt                                                                                                                           | Week 1                                                                                                         | Week 2                                                                                                                                                   | Week 3                                                                                                                                                           | Week 4                                                                                                                                       | Summary                                                                                   | Week 1            | Week 2                   | Week 3                 | Week 4            | Combined themes                         |
|                                                                                                                                  |                                                                                                                | a lot of weight                                                                                                                                          | for a walk good mentally                                                                                                                                         |                                                                                                                                              | mental health wellbeing.                                                                  |                   |                          |                        |                   |                                         |
| <i>Negative thought(s) this week</i>                                                                                             | Need to poo                                                                                                    | Painful at night, finding it hard to get to sleep gone midnight. Hard in shower need help                                                                | Want to do more hard when use to walk mountains every weekend. Friday hard feet poorly                                                                           | Painful to sit down hard to get to sleep                                                                                                     | Painful at night, disturbed sleep. ADL affected. Frustrated cannot resume normal activity | Anxious           | Anxious Energy           | Pain Depression        | Pain Sleep        | Pain Energy Depression Sleep            |
| <i>Most significant/memorable moment this week (may be positive or negative)</i>                                                 | Having the surgery positive                                                                                    | I can feel my feet properly again. Even itchy slow bits                                                                                                  | Sutures gone, yeppi make you feel amazing even though it's just the sutures                                                                                      | Being able to move up and down stairs very well                                                                                              | Improved movement. Able to walk up/down stairs. Skin visually better                      | Positive          | Movement Feeling         | Happy                  | Energy            | Energy Positive                         |
| <i>Please describe how this week has been compared to last week</i>                                                              | 1 <sup>st</sup> walk amazing                                                                                   | I'm out of hospital so at home when I do too much I can tell the next day. So I have to pace myself                                                      | 80% better week than last week I can walk around unaided at home+10 mins walk                                                                                    | Improvement again, good in a positive way                                                                                                    | Learning to pace not to overdo any activity. Almost fully able to move normally           | Movement (+)      | Anxiety Awareness Energy | Self-efficacy Movement | Energy Optimistic | Anxiety Energy Optimistic Self-efficacy |
| <i>Please record any other comments you may like to make regarding how you have felt or your experiences over the past week?</i> | Unconfy to sleep when I am on my side my stomach pulls. But I think this is because my stomach is very bloated | At the beginning of the week I was doing too much and found it hard and painful for a few days later. I must slow down and not rush around be patient, I | Monday was amazing having sutures out. Friday was an awful day I felt poorly I hurt I felt like I been hit by a bus maybe walk around supermarket to much than I | I'm struggling with socks and shoes as I can't bend have to sit up straight or feel pain in back. Shooting and sweats I've had one moment of | Disturbed sleep pattern. Sometime emotional. Better days. Need to learn to pace movement  | Sleep Energy      | Pain Fatigue             | Pain                   | Sleep Emotion     | Pain Fatigue Energy                     |

| Participant: P2 | Entry  |                                                                                                   |                                                                                                                                                                                                                            |                                                |         | Categories/Themes |        |        |        |                 |
|-----------------|--------|---------------------------------------------------------------------------------------------------|----------------------------------------------------------------------------------------------------------------------------------------------------------------------------------------------------------------------------|------------------------------------------------|---------|-------------------|--------|--------|--------|-----------------|
| Prompt          | Week 1 | Week 2                                                                                            | Week 3                                                                                                                                                                                                                     | Week 4                                         | Summary | Week 1            | Week 2 | Week 3 | Week 4 | Combined themes |
|                 |        | miss stretching, Pilates and walking. I keep popping outside for fresh air to stop my cabin fever | did a lot of walking at home. But better a Saturday it is hard to not help and feel harder mentally. But back feels great! Legs have improved still strange numb, stinging sensation on left thigh wound on abdo has gone. | crying not sure why but felt much better after |         |                   |        |        |        |                 |

### Diary entry: P3

| Participant: P3                               | Entry                                                            |                                                                                                        |                                                                                                 |                                                                                                   |                                                          | Categories/Themes        |                           |                        |                    |                                  |
|-----------------------------------------------|------------------------------------------------------------------|--------------------------------------------------------------------------------------------------------|-------------------------------------------------------------------------------------------------|---------------------------------------------------------------------------------------------------|----------------------------------------------------------|--------------------------|---------------------------|------------------------|--------------------|----------------------------------|
| Prompt                                        | Week 1                                                           | Week 2                                                                                                 | Week 3                                                                                          | Week 4                                                                                            | Summary                                                  | Week 1                   | Week 2                    | Week 3                 | Week 4             | Combined themes                  |
| <i>Feelings about your progress this week</i> | I can walk well with the aid of a walking stick. Extremely tired | Still walking well but I find if I go out for a walk I am lifeless with extreme tiredness the next day | Doing well. I can now walk to the supermarket and back without a break still with walking stick | Feeling proud, managed to walk into town and back with many stops took about 4 hours but I did it | Periodic feeling of extreme tiredness. Motivated to walk | Energy (-)<br>Motivation | Motivation<br>Fatigue (+) | Movement<br>Energy (+) | Positive<br>Energy | Positive<br>Energy<br>Motivation |
| <i>Feelings about your recovery so far</i>    | I am sore and uncomfortable but not                              | The medication keeps the pain                                                                          | Feeling positive but still so tired I                                                           | Still positive                                                                                    | Realistic but positive. Still feeling                    | Pain (+)<br>Anxiety      | Fatigue (+)<br>Pain       | Positive (+)<br>Energy | Positive           | Positive<br>Fatigue<br>Anxiety   |

| Participant: P3                                         | Entry                                                                                                                                                                              |                                                                                                                                       |                                                                                                                                                |                                                                                           |                                                      | Categories/Themes |                 |              |                    |                          |
|---------------------------------------------------------|------------------------------------------------------------------------------------------------------------------------------------------------------------------------------------|---------------------------------------------------------------------------------------------------------------------------------------|------------------------------------------------------------------------------------------------------------------------------------------------|-------------------------------------------------------------------------------------------|------------------------------------------------------|-------------------|-----------------|--------------|--------------------|--------------------------|
| Prompt                                                  | Week 1                                                                                                                                                                             | Week 2                                                                                                                                | Week 3                                                                                                                                         | Week 4                                                                                    | Summary                                              | Week 1            | Week 2          | Week 3       | Week 4             | Combined themes          |
|                                                         | expecting too much too soon                                                                                                                                                        | at bay which is helping me to go out for a walk. Still extreme tiredness                                                              | can only go out every other day                                                                                                                |                                                                                           | extreme tiredness                                    |                   |                 |              |                    |                          |
| <i>Level of motivation</i>                              | Motivated to walk about because I know it helps recovery                                                                                                                           | I managed to go to my friend's 50 <sup>th</sup> on Saturday. Didn't stay long but it felt good to be able to do that                  | Motivation is good on the days I go out. On the days I'm at home I'm so tired that I don't get distressed                                      | Motivation is still good but extreme tiredness is still there                             | Motivated but extreme tiredness at times             | Motivation        | Positive Energy | Motivation   | Motivation Fatigue | Motivated Fatigue Energy |
| <i>Symptoms you have experienced over the past week</i> | Pain in my back. Got an infection in my wound and went to the walk in centre, they cleaned it and gave antibiotics. Left hospital numb and tingly right top leg, it's still there. | Infection still there so a second course of antibiotics pain there if I don't take medication on time. Right top leg tingly and numb. | Numb lower back to my bum cheek. Infection cleared up but wound on my back not healed. Tummy wound doing well. Right leg still cold and tingly | Still numb feeling in left lower back and bum cheek. Right top leg cold numb and tingly   | Wound infection, feeling numb and tingly.            | Pain Symptoms     | Symptoms Pain   | Pain Anxiety | Pain Anxiety       | Pain Anxiety             |
| <i>Medications you have taken this week</i>             | Oxycodin, senna, naproxen, antibiotics, amitripline, mirtapazapine, pregabalin                                                                                                     | Tramadol, antihistamine, naproxen, amitripline, pregbalun, paracetamol, senna, antibiotics                                            | Tramadol, antihistamine, paracetamol, senna, naproxen, pregbalun, antibiotics, amytryptiline, mirtazapen                                       | Tramadol, paracetamol, antihistamine, naproxen, amitripline, pregabalun, senna mirtazapen | Appears to be dependent of level of pain experienced | Symptoms          | Pain            | Pain Bowel   | Pain               | Pain                     |



| Participant: P3                                                                                                                                                            | Entry                                                                                                                                                                                  |                                                                                 |                                                   |                                                     | Summary                                                                | Categories/Themes |                     |              |                  | Combined themes                   |
|----------------------------------------------------------------------------------------------------------------------------------------------------------------------------|----------------------------------------------------------------------------------------------------------------------------------------------------------------------------------------|---------------------------------------------------------------------------------|---------------------------------------------------|-----------------------------------------------------|------------------------------------------------------------------------|-------------------|---------------------|--------------|------------------|-----------------------------------|
|                                                                                                                                                                            | Week 1                                                                                                                                                                                 | Week 2                                                                          | Week 3                                            | Week 4                                              |                                                                        | Week 1            | Week 2              | Week 3       | Week 4           |                                   |
| <i>Healthcare appointments this week</i>                                                                                                                                   | Walking centre on Thursday, Friday and Sunday                                                                                                                                          | Walk in centre on Tuesday and Friday. All but 2 stitches removed                | Walking centre on Tuesday removed last 2 stitches | None                                                | Access due to infection primarily                                      | Access            | Access              | Access       | None             | Access                            |
| <i>Rehabilitation progress this week</i><br>- <i>Your ability to exercise and do activity this week</i><br><i>Return to work / activities / hobbies as relevant to you</i> | On Friday I took my first trip out to the supermarket with my son and I used a walking stick. Walked there stopped for hot chocolate and then walked home. Wasn't too slow I felt good | Walked very other day now get in the shower without help                        | Still walking every other day                     | Walking to town and back everyday                   | Motivated to walk, able to set target                                  | Motivated Support | Motivated Positive  | Positive (+) | Energy           | Positive Motivated Energy Support |
| <i>Positive thought(s) this week</i>                                                                                                                                       | I'm going home                                                                                                                                                                         | I'm really lucky to have a good support network of family and friends around me | All stitches now removed                          | I'm continuing to walk further and rest when needed | Thought of going home, family support and rate of healing              | Positive          | Support             | Positive     | Energy Positive  | Energy Positive Support           |
| <i>Negative thought(s) this week</i>                                                                                                                                       | Scared to go home                                                                                                                                                                      | Infection in back more medication stitches to stay in                           | No data                                           | No data                                             | Lack of support and fear wound won't heal and recovery may take longer | Anxiety           | Positive (-)        | No data      | No data          | Anxiety Symptoms                  |
| <i>Most significant/memorable moment this week(may</i>                                                                                                                     | Walked to Sainsbury with my son                                                                                                                                                        | I got to my friend's 50 <sup>th</sup> party for a                               | No data                                           | Seemed to have gone very quick                      | Good support mechanism                                                 | Energy Support    | Energy Movement (+) | No data      | Support Positive | Energy Support Movement           |

| Participant: P3                                                                                                                  | Entry                                                                                              |                                                       |                                                              |                                                         |                                                       | Categories/Themes |                          |                 |         |                             |
|----------------------------------------------------------------------------------------------------------------------------------|----------------------------------------------------------------------------------------------------|-------------------------------------------------------|--------------------------------------------------------------|---------------------------------------------------------|-------------------------------------------------------|-------------------|--------------------------|-----------------|---------|-----------------------------|
| Prompt                                                                                                                           | Week 1                                                                                             | Week 2                                                | Week 3                                                       | Week 4                                                  | Summary                                               | Week 1            | Week 2                   | Week 3          | Week 4  | Combined themes             |
| <i>be positive or negative)</i>                                                                                                  |                                                                                                    | couple of hours                                       |                                                              |                                                         | (family & friend)                                     |                   |                          |                 |         |                             |
| <i>Please describe how this week has been compared to last week</i>                                                              | A bit scary because I am at home but I've got plenty of family and friends around me               | Feels a bit easier to move about                      | Not too dissimilar to others walking and resting when needed | I still being spoiled with care from family and friends | Reassurance of family support                         | Anxiety Support   | Movement (+)<br>Positive | Movement Energy | Support | Anxiety Support<br>Positive |
| <i>Please record any other comments you may like to make regarding how you have felt or your experiences over the past week?</i> | My children bother and my friends have made my return home very easy. I'm very lucky. I live alone | My back feels sore, tight and itchy my tummy feels ok | No data                                                      | No data                                                 | Family support. Back and stomach feels sore and itchy | Support           | Pain                     |                 |         | Support<br>Pain             |

#### Diary entry: P4

| Participant: P4                               | Entry                                                                                                                                                                                  |                                                                                                                                             |                                                                                                                                           |                                                                                                                                                                 |                                         | Categories/Themes      |                       |                                 |                     |                                                   |
|-----------------------------------------------|----------------------------------------------------------------------------------------------------------------------------------------------------------------------------------------|---------------------------------------------------------------------------------------------------------------------------------------------|-------------------------------------------------------------------------------------------------------------------------------------------|-----------------------------------------------------------------------------------------------------------------------------------------------------------------|-----------------------------------------|------------------------|-----------------------|---------------------------------|---------------------|---------------------------------------------------|
| Prompt                                        | Week 1                                                                                                                                                                                 | Week 2                                                                                                                                      | Week 3                                                                                                                                    | Week 4                                                                                                                                                          | Summary                                 | Week 1                 | Week 2                | Week 3                          | Week 4              | Combined themes                                   |
| <i>Feelings about your progress this week</i> | Relatively slow due to the fact that I was released from hospital in January 2018. Returned home taking the medication that was prescribed by the hospital. At the moment I am walking | The progress this week has been very good. At the end of this week I hope to start driving obviously with somebody else in the car with me. | Progress this week has been good. Still got the slight numbness to the left foot but seems to be getting better. So we'll see how it goes | Progress this week has been hindered by the weather. Haven't been able to get out as much as I would have liked to due to the uneven ground and I don't want to | Satisfactory progress, feeling positive | Positive (+)<br>Energy | Positive (+)<br>Speed | Positive (+)<br>Anxiety<br>Pain | Movement<br>Anxiety | Positive<br>Energy<br>Pain<br>Movement<br>Anxiety |

| Participant: P4                                         | Entry                                                                                                    |                                                                                                                                           |                                                                                                                                                              |                                                                                                                                                |                                          | Categories/Themes  |                     |                     |                       |                          |
|---------------------------------------------------------|----------------------------------------------------------------------------------------------------------|-------------------------------------------------------------------------------------------------------------------------------------------|--------------------------------------------------------------------------------------------------------------------------------------------------------------|------------------------------------------------------------------------------------------------------------------------------------------------|------------------------------------------|--------------------|---------------------|---------------------|-----------------------|--------------------------|
| Prompt                                                  | Week 1                                                                                                   | Week 2                                                                                                                                    | Week 3                                                                                                                                                       | Week 4                                                                                                                                         | Summary                                  | Week 1             | Week 2              | Week 3              | Week 4                | Combined themes          |
|                                                         | around and have managed to negotiate 2 flights of stairs.                                                | I feel positive that I can do it but that will be updated in next weeks diary.                                                            | during the week.                                                                                                                                             | fall and put myself back.                                                                                                                      |                                          |                    |                     |                     |                       |                          |
| <i>Feelings about your recovery so far</i>              | Recovery so far has been as expected or maybe I wasn't fully aware of the amount of surgery I undertook. | This week has been extremely good, walking further and climbing stairs as normal. Been shopping and out for meals so onwards and upwards. | Recovery on week 4 seems absolutely fine. Stiches healed. Slight discomfort on the actual wound area but I think that is bruising that im feeling.           | Recovery is going in the right direction. Left foot is slowly getting movement back in the big toe due to a different exercise im undertaking. | Awareness of recovery, positive attitude | Expected Awareness | Positive (+) Energy | Positive (+) Energy | Movement Positive (+) | Positive Energy Expected |
| <i>Level of motivation</i>                              | To get back to a better standard of living as in manoeuvrability.                                        |                                                                                                                                           | Motivation is still high. Pushing myself past what I was doing last week but obviously still taking it slowly. But progress is going in the right direction. | Motivation is still high.                                                                                                                      | Driven                                   | Drive              | No data             | Energy Positive (+) | Positive (+)          | Positive Drive Energy    |
| <i>Symptoms you have experienced over the past week</i> | Slight less to left foot mainly the toe                                                                  | This week the same as the previous                                                                                                        | No new symptoms. Just                                                                                                                                        | No new symptoms this week apart from                                                                                                           | Restricted movement,                     | Movement           | Anxiety Hope Pain   | Pain                | Speed                 | Pain Speed Anxiety       |

| Participant: P4                             | Entry                                                                                                                                      |                                                                                                                                                                                                                                                                                                                                 |                                                                                       |                                                                                |                                                    | Categories/Themes |            |            |            |                      |
|---------------------------------------------|--------------------------------------------------------------------------------------------------------------------------------------------|---------------------------------------------------------------------------------------------------------------------------------------------------------------------------------------------------------------------------------------------------------------------------------------------------------------------------------|---------------------------------------------------------------------------------------|--------------------------------------------------------------------------------|----------------------------------------------------|-------------------|------------|------------|------------|----------------------|
| Prompt                                      | Week 1                                                                                                                                     | Week 2                                                                                                                                                                                                                                                                                                                          | Week 3                                                                                | Week 4                                                                         | Summary                                            | Week 1            | Week 2     | Week 3     | Week 4     | Combined themes      |
|                                             | area. I think my body is still quite swollen and some of the nerves that lead down to the foot are still being compressed – in my opinion! | 2 weeks, I still have concerns with the my left foot with the numbness in the area of the big toe. This is making me slightly concerned again however I have been told my several members of the medical profession that I am only at the end of the third week it is still extremely early for things to be fully operational. | discomfort in the left foot – slight numbness but it's not getting worse.             | progress with the big toe in the left foot which appears to be getting better. | pain discomfort                                    |                   |            |            |            | Hope                 |
| <i>Medications you have taken this week</i> | The medications that I have been prescribed after day 4 of being at home I stopped taking the stronger painkiller and discontinued         | No medications all this week.                                                                                                                                                                                                                                                                                                   | Too one days worth of paracetamol morning and evening dose one day mid week because I | No medication taken this week.                                                 | Adherence to medication in view of reducing intake | Adherence         | Management | Management | Management | Management Adherence |

| Participant: P4                                                                                                                                                            | Entry                                                                                                                                                                                                                 |                                                                                                                                                                                                 |                                                                                                                                                                |                                                                                                                    |                                           | Categories/Themes |                |                           |              |                                             |
|----------------------------------------------------------------------------------------------------------------------------------------------------------------------------|-----------------------------------------------------------------------------------------------------------------------------------------------------------------------------------------------------------------------|-------------------------------------------------------------------------------------------------------------------------------------------------------------------------------------------------|----------------------------------------------------------------------------------------------------------------------------------------------------------------|--------------------------------------------------------------------------------------------------------------------|-------------------------------------------|-------------------|----------------|---------------------------|--------------|---------------------------------------------|
| Prompt                                                                                                                                                                     | Week 1                                                                                                                                                                                                                | Week 2                                                                                                                                                                                          | Week 3                                                                                                                                                         | Week 4                                                                                                             | Summary                                   | Week 1            | Week 2         | Week 3                    | Week 4       | Combined themes                             |
|                                                                                                                                                                            | taking the paracetamol and the senacot to obviously keep my bowels open.                                                                                                                                              |                                                                                                                                                                                                 | getting some internal pains but that's all stopped so no medication apart from that one day.                                                                   |                                                                                                                    |                                           |                   |                |                           |              |                                             |
| <i>Healthcare appointments this week</i>                                                                                                                                   | I have no healthcare appointments this week.                                                                                                                                                                          | Returned to the GP practice nurse this week to have the dressing removed and she is of the opinion that the wound is 95% healed, closed up and can leave the dressing off and im able to bathe. | Returned to practice nurse and all looking good with the wound so looking forward to a longish soak in the bath.                                               | No appointments this week.                                                                                         | Management of wound effectively           | Awareness         | Hope           | Positive (+)              | Awareness    | Awareness<br>Management<br>Hope<br>Positive |
| <i>Rehabilitation progress this week</i><br>- <i>Your ability to exercise and do activity this week</i><br><i>Return to work / activities / hobbies as relevant to you</i> | I have been out onto the street and walked to the local shop but at a greatly reduced speed. The exercise I have been doing within the house is just walking about, walking up and down the stairs and generally just | Same as last week. Just walking further and climbing stairs in house more often. I'm retired so no work to return to. I'm still not able to do any activities as                                | Still exercising as much as I can. Stated to use a leg exercise machine to strengthen the muscles in the legs and thighs. But other than that still walking as | Exercising indoors this week as snow has put a dampener on exercising outdoors and safely. No work as I'm retired. | Pacing activities, awareness of timescale | Hinder            | Speed Movement | Awareness<br>Positive (+) | Positive (+) | Positive<br>Hinder<br>Awareness<br>Movement |

| Participant: P4                      | Entry                                                                                                                                                                                                                                                                                                                                                |                                                                                                      |                                |                                                                                                                           |                               | Categories/Themes |              |              |              |                              |
|--------------------------------------|------------------------------------------------------------------------------------------------------------------------------------------------------------------------------------------------------------------------------------------------------------------------------------------------------------------------------------------------------|------------------------------------------------------------------------------------------------------|--------------------------------|---------------------------------------------------------------------------------------------------------------------------|-------------------------------|-------------------|--------------|--------------|--------------|------------------------------|
| Prompt                               | Week 1                                                                                                                                                                                                                                                                                                                                               | Week 2                                                                                               | Week 3                         | Week 4                                                                                                                    | Summary                       | Week 1            | Week 2       | Week 3       | Week 4       | Combined themes              |
|                                      | keeping as mobile as I can.                                                                                                                                                                                                                                                                                                                          | they probably would be too strenuous and they involve lifting things.                                | much as I can.                 |                                                                                                                           |                               |                   |              |              |              |                              |
| <i>Positive thought(s) this week</i> | Motivation to get myself fully or as fully fit as I can for a family holiday at the end of April.                                                                                                                                                                                                                                                    | Looking forward to being able to drive my car at the end of this week or the beginning of next week. | Having a bath – what a luxury. | Being able to move the left foot and toe slightly better than previously. Some improvement is better than no improvement. | Motivated to get fully fit    | Motivation        | Positive (+) | Positive (+) | Movement     | Positive Movement Motivation |
| <i>Negative thought(s) this week</i> | Not many. My only concern is the slight differential pain between the left and the right foot. I have spoke to my consultant's secretary who has spoken to to my consultant who has reassured me at this stage as it's the very early recovery period, that this numbness that I have got is possibly down to parts of nerves still being trapped by | No negative thoughts.                                                                                | No negative thoughts.          | Nothing really apart from the snow putting a dampner on things.                                                           | Maintaining positive thoughts | Positive (+)      | Positive (+) | Positive (+) | Positive (+) | Positive                     |

| Participant: P4                                                                  | Entry                                                                                                                                                                                                |                                                                               |                                                                                                                             |                                                                                                                                  |                                                             | Categories/Themes    |              |              |                    |                                  |
|----------------------------------------------------------------------------------|------------------------------------------------------------------------------------------------------------------------------------------------------------------------------------------------------|-------------------------------------------------------------------------------|-----------------------------------------------------------------------------------------------------------------------------|----------------------------------------------------------------------------------------------------------------------------------|-------------------------------------------------------------|----------------------|--------------|--------------|--------------------|----------------------------------|
| Prompt                                                                           | Week 1                                                                                                                                                                                               | Week 2                                                                        | Week 3                                                                                                                      | Week 4                                                                                                                           | Summary                                                     | Week 1               | Week 2       | Week 3       | Week 4             | Combined themes                  |
|                                                                                  | the swollen area in the main back. Can't really say about any negative thoughts this week as its pointless being negative when you've got to look forward to the positive things                     |                                                                               |                                                                                                                             |                                                                                                                                  |                                                             |                      |              |              |                    |                                  |
| <i>Most significant/memorable moment this week (may be positive or negative)</i> | Was going out for a meal to a restaurant and feeling like I was being accepted back into the community. Silly thought but it was nice to get out.                                                    |                                                                               | Having a bath. Driving a short distance in the car. Obviously having my wife next to me in the passenger seat just in case. | Nothing really apart from the wife returning from holiday in 2 days' time.                                                       | Some normality                                              | Speed Support        | No data      | Reassurance  | Positive           | Positive<br>Speed<br>Reassurance |
| <i>Please describe how this week has been compared to last week</i>              | This week has been totally different to last week as I hadn't had the operation. I'm in pain, well was in pain so its hard to give feedback on this but hopefully next week once this first week has | This week has been an improvement on last week so again, onwards and upwards. | Good. Things seem to be going in the right direction which is good so onwards and upwards.                                  | Has been slightly better in some ways than last week as that has been to do with the progress made with regards to the toe/foot. | Feeling pain periodically. Acknowledged reasonable progress | Positive (+)<br>Pain | Positive (+) | Positive (+) | Progress<br>Energy | Energy<br>Positive (+)<br>Pain   |

| Participant: P4                                                                                                                  | Entry                                                                                                                                                                                                                                                                                                                       |        |        |        |         | Categories/Themes |        |        |        |                 |
|----------------------------------------------------------------------------------------------------------------------------------|-----------------------------------------------------------------------------------------------------------------------------------------------------------------------------------------------------------------------------------------------------------------------------------------------------------------------------|--------|--------|--------|---------|-------------------|--------|--------|--------|-----------------|
| Prompt                                                                                                                           | Week 1                                                                                                                                                                                                                                                                                                                      | Week 2 | Week 3 | Week 4 | Summary | Week 1            | Week 2 | Week 3 | Week 4 | Combined themes |
|                                                                                                                                  | settled down I'll be able to be positive on how the next week compared to this week.                                                                                                                                                                                                                                        |        |        |        |         |                   |        |        |        |                 |
| <i>Please record any other comments you may like to make regarding how you have felt or your experiences over the past week?</i> | The main thing at the moment is that its still hard to report but on what I can feel the pain I had before the operation is no longer present in the lower back and the legs. I still have pain obviously which is no the same sort of pain so I'm hoping that the problems I did have, have been rectified by the surgery. |        |        |        |         |                   |        |        |        | Positive Pain   |



**Diary entry: P5**

| Participant: P5                               | Entry                                                                                                                                                                                                                                       |                                                                                                                                                                                                                                                                                                       |                                                                                                                                                                                                                        |                                                                                                                                                                         |                 | Categories/Themes |              |                    |                 |                          |
|-----------------------------------------------|---------------------------------------------------------------------------------------------------------------------------------------------------------------------------------------------------------------------------------------------|-------------------------------------------------------------------------------------------------------------------------------------------------------------------------------------------------------------------------------------------------------------------------------------------------------|------------------------------------------------------------------------------------------------------------------------------------------------------------------------------------------------------------------------|-------------------------------------------------------------------------------------------------------------------------------------------------------------------------|-----------------|-------------------|--------------|--------------------|-----------------|--------------------------|
| Prompt                                        | Week 1                                                                                                                                                                                                                                      | Week 2                                                                                                                                                                                                                                                                                                | Week 3                                                                                                                                                                                                                 | Week 4                                                                                                                                                                  | Summary         | Week 1            | Week 2       | Week 3             | Week 4          | Combined themes          |
| <i>Feelings about your progress this week</i> | Mixture of emotions. Ranging from euphoria to anxiety. Lots of feelings about impact and outcomes of surgery on activities of daily living and work commitments                                                                             | Up and down. There have been some highs and lows but overall I am feeling positive with regard to the outcome of the surgery                                                                                                                                                                          | There is definite progress. I am still having good days and less good days in terms of how I feel physically and emotionally, but overall definite improvement in confidence with mobility and other daily activities. | Overall Good. Lots of milestones achieved,                                                                                                                              | Mixed feelings  | Happy Anxiety     | Positive (+) | Confident Movement | Energy          | Positive Energy Anxiety  |
| <i>Feelings about your recovery so far</i>    | Mainly positive with some caution due to changes in geography of pain and discomfort in the post operative period. Cautiously optimistic. I appreciate it is going to be a long rehabilitation process and I am slowly accepting that fact. | Recovery is slow and steady and I maybe hadn't quite prepared myself for that. However this week has resulted in me becoming much more independent with regard to the daily activities of living, with some obvious restrictions with regard to food preparation. I am assisting with daily household | Pleased and grateful and ready to keep working hard with the recovery phase.                                                                                                                                           | That hard work seems to be paying off. Gently increasing mobilisation and able to perform more household tasks but still some way to go yet. Still some residual issues | Steady recovery | Frustration       | Energy       | Energy             | Movement Energy | Energy Cautious Positive |

| Participant: P5            | Entry                                                                                                                                                                                                                          |                                                                                                                                                                                                                                                                                                                  |                                                                                                                                                                                                                                     |                                                                                                                                                                              |                               | Categories/Themes |              |                  |         |                                  |
|----------------------------|--------------------------------------------------------------------------------------------------------------------------------------------------------------------------------------------------------------------------------|------------------------------------------------------------------------------------------------------------------------------------------------------------------------------------------------------------------------------------------------------------------------------------------------------------------|-------------------------------------------------------------------------------------------------------------------------------------------------------------------------------------------------------------------------------------|------------------------------------------------------------------------------------------------------------------------------------------------------------------------------|-------------------------------|-------------------|--------------|------------------|---------|----------------------------------|
| Prompt                     | Week 1                                                                                                                                                                                                                         | Week 2                                                                                                                                                                                                                                                                                                           | Week 3                                                                                                                                                                                                                              | Week 4                                                                                                                                                                       | Summary                       | Week 1            | Week 2       | Week 3           | Week 4  | Combined themes                  |
|                            |                                                                                                                                                                                                                                | duties as far as my surgery currently allows, which in turn helps to foster feelings of positivity. Mild degree of frustration with regard to not feeling able to undertake household chores. I feel grateful and blessed that I have a fantastic family and friends who are on hand to assist me as necessary.. |                                                                                                                                                                                                                                     |                                                                                                                                                                              |                               |                   |              |                  |         |                                  |
| <i>Level of motivation</i> | I am a very motivated person ordinarily but symptoms such as post operative surgical pain, exhaustion and nausea can impact on that motivation. Trying to keep a bit of a routine with regard to ensuring adequate mobility is | My level of motivation is quite high. I am trying to establish some sort of routine to the day and ensure that the balance between mobilisation and rest periods is sensible to assist in the post operative recovery. I need to remind myself that it is still                                                  | Excellent this week. I had a goal to attend a work presentation for an award my team had achieved. It was the culmination of two years of my work life so I was determined to be there with my team. This involved me getting fully | Overall positive. Still experiencing marked fatigue one or two days in the week. As I've always been borderline anaemic with a lower blood pressure, it could be linked, but | Balancing mood and positivity | Mood Motivation   | Positive (+) | Goal Positive(+) | Fatigue | Goal Fatigue Positive Motivation |

| Participant: P5                                         | Entry                                                                                                                                                                                                                                                                |                                                                                                                                                                                                                                                                                                                                                                                  |                                                                                                                                                                                                                                                                                                                                                                       |                                                                                                                                                                                                                                                                     |                         | Categories/Themes |        |               |        |                 |
|---------------------------------------------------------|----------------------------------------------------------------------------------------------------------------------------------------------------------------------------------------------------------------------------------------------------------------------|----------------------------------------------------------------------------------------------------------------------------------------------------------------------------------------------------------------------------------------------------------------------------------------------------------------------------------------------------------------------------------|-----------------------------------------------------------------------------------------------------------------------------------------------------------------------------------------------------------------------------------------------------------------------------------------------------------------------------------------------------------------------|---------------------------------------------------------------------------------------------------------------------------------------------------------------------------------------------------------------------------------------------------------------------|-------------------------|-------------------|--------|---------------|--------|-----------------|
| Prompt                                                  | Week 1                                                                                                                                                                                                                                                               | Week 2                                                                                                                                                                                                                                                                                                                                                                           | Week 3                                                                                                                                                                                                                                                                                                                                                                | Week 4                                                                                                                                                                                                                                                              | Summary                 | Week 1            | Week 2 | Week 3        | Week 4 | Combined themes |
|                                                         | achieved whilst balancing against the fear of 'overdoing it' which could impact on healing process.                                                                                                                                                                  | 'early days'. I am using this time positively to undertake tasks that I have been putting off but am able to complete at this point in my recovery.                                                                                                                                                                                                                              | dressed, travelling in a car and waiting for the ceremony to start in a public place. (Slight feeling of vulnerability but glad to be outside and back in the real world).                                                                                                                                                                                            | not bad enough for me to see GP. I still feel very much in the ongoing recovery phase.                                                                                                                                                                              |                         |                   |        |               |        |                 |
| <i>Symptoms you have experienced over the past week</i> | Unusual geographical changes of areas of pain/discomfort in the right limb, groin and surgical site. There is obvious improvement, but localised tenderness makes it hard to assess. Vaso-vagal episode day 2, night sweats, nausea and general fatigue and weakness | The most notable and hideously painful full back spasm episode. This type of spasm has the ability to completely immobilise me and is quite frightening to be honest. I need to remember to rise slowly from the lying down position to standing. I continue to experience the lower limb lateral pain in the right leg which I experienced pre-operatively, but there is marked | Still having some degree of lower lateral right leg pain and a very odd 4th right toe pain. Similar to the dorsal skin soreness experienced early on. I don't think it is the anti embolism stockings as there is no redness, a superficial soreness all over the 4th toe for something so small is fairly sore. After standing for a long period at the presentation | As above-fatigue. In addition when mobilising over longer distance a bit foggy. Had a bit of a shock when I gently shook my head after a shower. I got a jolt of pain that reverberated down my spine which was very unpleasant. I won't be doing that again. Still | General feeling of pain | Pain              | Pain   | Pain<br>Sleep | Pain   | Pain<br>Sleep   |

| Participant: P5 | Entry  |                                                                                                                                                                                                                                                                                                                                                                                                                                                                                                                                                                                     |                                                                                                                                                                                                                                              |                                                                                                                                                   |         | Categories/Themes |        |        |        |                 |
|-----------------|--------|-------------------------------------------------------------------------------------------------------------------------------------------------------------------------------------------------------------------------------------------------------------------------------------------------------------------------------------------------------------------------------------------------------------------------------------------------------------------------------------------------------------------------------------------------------------------------------------|----------------------------------------------------------------------------------------------------------------------------------------------------------------------------------------------------------------------------------------------|---------------------------------------------------------------------------------------------------------------------------------------------------|---------|-------------------|--------|--------|--------|-----------------|
| Prompt          | Week 1 | Week 2                                                                                                                                                                                                                                                                                                                                                                                                                                                                                                                                                                              | Week 3                                                                                                                                                                                                                                       | Week 4                                                                                                                                            | Summary | Week 1            | Week 2 | Week 3 | Week 4 | Combined themes |
|                 |        | <p>improvement in the groin, knee and dorsal foot. I experienced some temporary slight numbness on the 2nd toe on the right foot which is now resolved, but had an odd almost sunburn like skin sensation over the right dorsal foot, there was no skin redness nor did I have a temperature, but not pleasant when covered by the anti embolism stockings and bedclothes etc. This seems also to be resolving. Some dull surgical site pain also being experienced but I very much expected this. The most overwhelming symptom this week I have experienced has probably been</p> | <p>I went to, I experienced the most horrid heavy leg pain bilaterally, posteriorly on both legs. This was a heavy feeling and my legs were restless all through the night. I therefore had a broken sleep and paid for it the next day.</p> | <p>have this weird 'sore 4th toe with some intermittent dorsal foot soreness' and the lower lateral right leg/ knee intermittent dull aching.</p> |         |                   |        |        |        |                 |

| Participant: P5                                                               | Entry                                                                                                                                 |                                                                                                                                                |                                                                                   |                                                                                                                                                                                                      |                                                | Categories/Themes |          |                           |                 |                          |
|-------------------------------------------------------------------------------|---------------------------------------------------------------------------------------------------------------------------------------|------------------------------------------------------------------------------------------------------------------------------------------------|-----------------------------------------------------------------------------------|------------------------------------------------------------------------------------------------------------------------------------------------------------------------------------------------------|------------------------------------------------|-------------------|----------|---------------------------|-----------------|--------------------------|
| Prompt                                                                        | Week 1                                                                                                                                | Week 2                                                                                                                                         | Week 3                                                                            | Week 4                                                                                                                                                                                               | Summary                                        | Week 1            | Week 2   | Week 3                    | Week 4          | Combined themes          |
|                                                                               |                                                                                                                                       | the general fatigue and weakness. I guess my body is working hard to repair itself after the surgery, as well as the effects of the medication |                                                                                   |                                                                                                                                                                                                      |                                                |                   |          |                           |                 |                          |
| <i>Medications you have taken this week</i>                                   | Tramadol, Paracetamol, Sumatriptan. Other narcotic analgesics, I/V antibiotics and anti-emetics given whilst in HDU. Senna, Lactulose | Tramadol, paracetamol, Senna, Lactulose.                                                                                                       | Mainly Tramadol. Small amount of paracetamol. Trying hard to reduce the Tramadol. | Decided to get off the Tramadol. Very unpleasant side effects resulted in intense abdominal cramping with some nausea and diarrhoea which seems to be improving now and I'm still taking paracetamol | As and when needed dependent on pain threshold | Adherence         | Manage   | Manage                    | Manage          | Adherence Management     |
| <i>Healthcare appointments this week</i>                                      | Nil                                                                                                                                   | Nil                                                                                                                                            | Wound check. Apparently the wound site has/is healing nicely.                     | Nil                                                                                                                                                                                                  | Attendance                                     | No data           | No data  | Access                    | No data         | Access                   |
| <i>Rehabilitation progress this week</i><br>- <i>Your ability to exercise</i> | Able to mobilise unaided for short walks. Able to ascend                                                                              | Able to check work emails, write a reference for an employee,                                                                                  | Physically trying to extend the walks, able to do more                            | Sorting cupboards, cooking, cleaning,                                                                                                                                                                | Restricted mobility, increased confidence      | Movement          | Movement | Positive (+)<br>Confident | Energy Positive | Energy Positive Movement |

| Participant: P5                                                                               | Entry                                                                                                                                                                                                                                                                      |                                                                                                                                                                                  |                                                                                                                                                                                                                                                  |                                                                                                                                          |                                        | Categories/Themes |          |         |              |                   |
|-----------------------------------------------------------------------------------------------|----------------------------------------------------------------------------------------------------------------------------------------------------------------------------------------------------------------------------------------------------------------------------|----------------------------------------------------------------------------------------------------------------------------------------------------------------------------------|--------------------------------------------------------------------------------------------------------------------------------------------------------------------------------------------------------------------------------------------------|------------------------------------------------------------------------------------------------------------------------------------------|----------------------------------------|-------------------|----------|---------|--------------|-------------------|
| Prompt                                                                                        | Week 1                                                                                                                                                                                                                                                                     | Week 2                                                                                                                                                                           | Week 3                                                                                                                                                                                                                                           | Week 4                                                                                                                                   | Summary                                | Week 1            | Week 2   | Week 3  | Week 4       | Combined themes   |
| <i>and do activity this week<br/>Return to work / activities / hobbies as relevant to you</i> | and descend stairs. Minimal assistance required with washing. Unable to complete any physical work but able to check and respond the work emails etc                                                                                                                       | watch TV, read, organise drawers, help keep the house tidy (with the assistance of my grabber). . Gentle mobilisation within personal limits. Enjoying catching up with visitors | household tasks and feeling I am contributing to the household. More confident with getting at lower level with good kneeling techniques to do extra household duties.                                                                           | many more household duties and still doing some work from home                                                                           |                                        |                   |          |         |              |                   |
| <i>Positive thought(s) this week</i>                                                          | The surgery has now been completed. Delighted that it is over. We are hopefully going to reacquire the ability to walk for long periods without agonising pain. My family and friends- I am blessed and thankful for them and my faith in God has also helped me this week | I am definitely improving with regard to mobilising and other daily activities. Nerves are slow to heal, but they can heal.                                                      | Time is passing very quickly. Since discharge I have only had 1 day where I haven't had any visitors. I am very blessed and grateful. And I need to get better to show my friends and family that their support has assisted me with the process | Very positive but remaining realistic. So much depends on the complete success of the operation and so far I'm very pleased and thankful | Family support, realism in achievement | Support           | Progress | Support | Positive (+) | Support Positive  |
| <i>Negative thought(s) this week</i>                                                          | Fears of reoccurrence of pre-surgery symptoms. Am I going to be able to do what I did before?                                                                                                                                                                              | Concerns with regard to the lower lateral discomfort in the right leg                                                                                                            | Is that lower lateral right leg pain / discomfort ever going to completely go so I can get on                                                                                                                                                    | Will this lower right lateral leg pain and sore toe ever go? Will I be able to                                                           | Adequate recovery                      | Fear              | Pain     | Hopeful | Fear Anxiety | Fear Hope Anxiety |

| Participant: P5                                                                  | Entry                                                                                                                                                                                                                                                                                                                       |                                                                                                                                                                                                                                                                                                  |                                                                                                                                                                                                                                                                             |                                                                                                                        |                                    | Categories/Themes |        |             |        |                               |
|----------------------------------------------------------------------------------|-----------------------------------------------------------------------------------------------------------------------------------------------------------------------------------------------------------------------------------------------------------------------------------------------------------------------------|--------------------------------------------------------------------------------------------------------------------------------------------------------------------------------------------------------------------------------------------------------------------------------------------------|-----------------------------------------------------------------------------------------------------------------------------------------------------------------------------------------------------------------------------------------------------------------------------|------------------------------------------------------------------------------------------------------------------------|------------------------------------|-------------------|--------|-------------|--------|-------------------------------|
| Prompt                                                                           | Week 1                                                                                                                                                                                                                                                                                                                      | Week 2                                                                                                                                                                                                                                                                                           | Week 3                                                                                                                                                                                                                                                                      | Week 4                                                                                                                 | Summary                            | Week 1            | Week 2 | Week 3      | Week 4 | Combined themes               |
|                                                                                  |                                                                                                                                                                                                                                                                                                                             |                                                                                                                                                                                                                                                                                                  | with my recovery? I'm aiming for 100% recovery, but I will be grateful for anything that allows me to walk/ exercise like I used to                                                                                                                                         | run again... What if unusual exercise affects my surgery. When will the vertebrae and bony fusion be solid and strong? |                                    |                   |        |             |        |                               |
| <i>Most significant/memorable moment this week (may be positive or negative)</i> | Seeing my family when I woke up in HDU. Appreciating the immediate benefit of pain relief was my most memorable moment. The realisation that a different type of pain / discomfort would need to be dealt with post operatively in order to continue making progress. Balancing pain medication relief is significant as it | Full back/ torso spasm (if that's what it was). I couldn't move or get comfortable for a few minutes which was very scary. The pain reduced me to tears, but this could have been coupled with anxiety. Luckily my husband was around- not that he could help in any way- it had to pass itself. | Going to my award ceremony in at the Council House with the Lord Mayor and also meeting with my researcher, as it was therapeutic talking about how my symptoms resulted in a surgical intervention and how that surgery now has the power to return me to my former health | Increasing independence- feeling I am contributing to the household / family activities again                          | Family support, encourage recovery | Support           | Pain   | Therapeutic | Energy | Energy<br>Pain<br>Therapeutic |

| Participant: P5                                                                                                                  | Entry                                                                                                                                                                                                                                                               |                                                                                                                                                                              |                                                                                                                                                                                                                                    |                                                                                                                                                                           |                                       | Categories/Themes |              |              |              |                     |
|----------------------------------------------------------------------------------------------------------------------------------|---------------------------------------------------------------------------------------------------------------------------------------------------------------------------------------------------------------------------------------------------------------------|------------------------------------------------------------------------------------------------------------------------------------------------------------------------------|------------------------------------------------------------------------------------------------------------------------------------------------------------------------------------------------------------------------------------|---------------------------------------------------------------------------------------------------------------------------------------------------------------------------|---------------------------------------|-------------------|--------------|--------------|--------------|---------------------|
| Prompt                                                                                                                           | Week 1                                                                                                                                                                                                                                                              | Week 2                                                                                                                                                                       | Week 3                                                                                                                                                                                                                             | Week 4                                                                                                                                                                    | Summary                               | Week 1            | Week 2       | Week 3       | Week 4       | Combined themes     |
|                                                                                                                                  | impacts on everything                                                                                                                                                                                                                                               |                                                                                                                                                                              |                                                                                                                                                                                                                                    |                                                                                                                                                                           |                                       |                   |              |              |              |                     |
| <i>Please describe how this week has been compared to last week</i>                                                              | I'm obviously less mobile. I was at my full time job last week and a busy mum. This week I have had to submit to being cared for by my Drs, Nurses, Physio and family and friends. Having to rely on others when I am normally fiercely independent has been tough. | Definite improvement. Managing to reduce analgesia slightly. I do feel that I have 'turned a corner' with regard to my progress. Hopefully the only way is up from here on.. | Improving, definite improvement generally physically and mentally                                                                                                                                                                  | Improved.                                                                                                                                                                 | Emotionally drained                   | Depression        | Positive (+) | Progress     | Positive (+) | Positive Depression |
| <i>Please record any other comments you may like to make regarding how you have felt or your experiences over the past week?</i> | I have moved from euphoria to feeling very low. Whether it is because I am also menopausal is difficult to know, but ultimately grateful to my surgeons and looking forward to getting on with working hard to get a good recovery and the best                     | Again thankful for the skill of the surgeons and the care of all allied health professionals. Overall this 2nd week has had both highs and lows                              | I know I must remain patient and not 'run before I can walk'. I know that nerves can take months to heal. There is definite improvement as my pre-operative groin and knee and dorsal right foot pain has virtually disappeared. I | Some frustrations with matters at work, but I must remember I am still on sick leave and I need to keep focused on my recovery. That must be priority. The wound site had | Staying hopeful, focussed on recovery | Positive (+)      | Energy       | Positive (+) | Frustration  | Positive Energy     |



| Participant: P5 | Entry            |        |                                                                                                                                                                     |                                                           |         | Categories/Themes |        |        |        |                 |
|-----------------|------------------|--------|---------------------------------------------------------------------------------------------------------------------------------------------------------------------|-----------------------------------------------------------|---------|-------------------|--------|--------|--------|-----------------|
| Prompt          | Week 1           | Week 2 | Week 3                                                                                                                                                              | Week 4                                                    | Summary | Week 1            | Week 2 | Week 3 | Week 4 | Combined themes |
|                 | possible outcome |        | must stay positive and be hopeful that the intermittent lower right lateral leg pain will eventually improve. Again so grateful for the skills of the medical team. | been a bit swollen one side but seems to be resolving now |         |                   |        |        |        |                 |

### Diary entry: P6

| Participant: P6                               | Entry                                                  |                                                                                    |                                                             |                                                                                          |                                          | Categories/Themes |              |              |              |                              |
|-----------------------------------------------|--------------------------------------------------------|------------------------------------------------------------------------------------|-------------------------------------------------------------|------------------------------------------------------------------------------------------|------------------------------------------|-------------------|--------------|--------------|--------------|------------------------------|
| Prompt                                        | Week 1                                                 | Week 2                                                                             | Week 3                                                      | Week 4                                                                                   | Summary                                  | Week 1            | Week 2       | Week 3       | Week 4       | Combined themes              |
| <i>Feelings about your progress this week</i> | Slow progress being made                               | Feeling progress is a little better this week but a long way to go                 | Progress slowly gathering momentum                          | Going for walks of 30 mins showing good progress now able to sit longer                  | Recognising that recovery may be lengthy | Anxiety           | Positive (+) | Speed        | Positive (+) | Speed<br>Positive<br>Anxiety |
| <i>Feelings about your recovery so far</i>    | Feeling quite weak suffering loose bowel movements     | Recovering is making slow progress though I am able to do more things and exercise | All positive now walking upright                            | Quite happy as now I think I have unearthed causes of feet problem due to fall last year | Slow progress but remain hopeful         | Fear              | Speed        | Positive (+) | Positive     | Positive<br>Speed            |
| <i>Level of motivation</i>                    | Feeling motivated but being patient as it will improve | I still have self motivation and even more after                                   | Motivation good. Am able to drive again and use the hot tub | Have good motivation to get back to as normal as possible                                | Reasonable level of motivation           | Hope              | Hope         | Positive     | Hope         | Hope<br>Positive             |

| <b>Participant: P6</b>                                                                                                                                                     | <b>Entry</b>                             |                                                                                                 |                                                                                                                      |                                                                      |                                                  | <b>Categories/Themes</b> |               |               |                          |                             |
|----------------------------------------------------------------------------------------------------------------------------------------------------------------------------|------------------------------------------|-------------------------------------------------------------------------------------------------|----------------------------------------------------------------------------------------------------------------------|----------------------------------------------------------------------|--------------------------------------------------|--------------------------|---------------|---------------|--------------------------|-----------------------------|
| <b>Prompt</b>                                                                                                                                                              | <b>Week 1</b>                            | <b>Week 2</b>                                                                                   | <b>Week 3</b>                                                                                                        | <b>Week 4</b>                                                        | <b>Summary</b>                                   | <b>Week 1</b>            | <b>Week 2</b> | <b>Week 3</b> | <b>Week 4</b>            | <b>Combined themes</b>      |
|                                                                                                                                                                            |                                          | talking to surgeon                                                                              |                                                                                                                      |                                                                      |                                                  |                          |               |               |                          |                             |
| <i>Symptoms you have experienced over the past week</i>                                                                                                                    | Loose bowel movements<br>dehydration     | Pullinh and slight pain in oeration area. Maybe due to late physio/scar tissue                  | Still minor pulling on back and buttocks                                                                             | Minor twinges in back and buttocks                                   | Pain at the wound site, irregular bowel movement | Movement                 | Pain          | Pain          | Pain                     | Pain<br>Movement            |
| <i>Medications you have taken this week</i>                                                                                                                                | Pain killers<br>senna,<br>dioralyte      | Folic acid prescribed by local doctor pain killers but only when absolutely required omeprazole | Folic acid daily, painkillers as and when omeprazole                                                                 | Folic acid daily less pain killers omeprazole                        | Managing medication according to pain threshold  | Management               | Management    | Awareness     | Management               | Management<br>Awareness     |
| <i>Healthcare appointments this week</i>                                                                                                                                   | In hospital overnight due to dehydration | Beginning of the week saw surgeon saw local doctor for results of blood test                    | Doctors to discuss effects of folic acid                                                                             | First visit to physio                                                | Access to healthcare                             | Access                   | Access        | Access        | Access                   | Access                      |
| <i>Rehabilitation progress this week</i><br>- <i>Your ability to exercise and do activity this week</i><br><i>Return to work / activities / hobbies as relevant to you</i> | Little exercise done<br>homebased        | Able to do exercises and slowly increasing activities did Xmas decorations on tree              | Able to carry out exercises and activities easier tidied out hypes and did a little cooking. Not yet back to hobbies | No problem with exercises and activities back to sewing short spells | Progressive with the ability to do some exercise | Speed                    | Movement      | Positive (+)  | Movement<br>Positive (+) | Movement<br>Positive        |
| <i>Positive thought(s) this week</i>                                                                                                                                       | Not much                                 | Not a great deal of positives except being able to use Jacuzzi                                  | Horay for my independence with driving and able to visit friends                                                     | Always positive and notice improvement                               | Adjusting to normal life, some positive          | Speed                    | Positive (-)  | Happy         | Positive<br>Energy       | Positive<br>Energy<br>Speed |

| <b>Participant: P6</b>                                                                                                           | <b>Entry</b>                      |                                                     |                             |                                                                          |                                            | <b>Categories/Themes</b> |               |               |               |                        |
|----------------------------------------------------------------------------------------------------------------------------------|-----------------------------------|-----------------------------------------------------|-----------------------------|--------------------------------------------------------------------------|--------------------------------------------|--------------------------|---------------|---------------|---------------|------------------------|
| <b>Prompt</b>                                                                                                                    | <b>Week 1</b>                     | <b>Week 2</b>                                       | <b>Week 3</b>               | <b>Week 4</b>                                                            | <b>Summary</b>                             | <b>Week 1</b>            | <b>Week 2</b> | <b>Week 3</b> | <b>Week 4</b> | <b>Combined themes</b> |
| <i>Negative thought(s) this week</i>                                                                                             | Feeling a little sorry for myself | Slow progress and still with slight pain very tired | None at moment              | None really                                                              | Emotionally drained due to slow progress   | Mood                     | Pain Anxiety  | Positive (+)  | Positive (+)  | Positive Mood Anxiety  |
| <i>Most significant/memorable moment this week (may be positive or negative)</i>                                                 | None                              | Being given the clearance to use hot tub            | Driving and hot tub         | Visit of granddaughter to cathedral to see trees xmas and just to see me | Good spirit due to support and reassurance | No data                  | Positive (+)  | Mood          | Support Mood  | Mood Support           |
| <i>Please describe how this week has been compared to last week</i>                                                              | Little improvement                | No data                                             | Progress is more pronounced | Each week is getting better                                              | Slow progress but showing improvement      | Slow                     | No data       | Speed         | Movement      | Slow Movement Speed    |
| <i>Please record any other comments you may like to make regarding how you have felt or your experiences over the past week?</i> | No data                           | Sleeping difficulty hence always tired              | Still sleeping problems     | Still sleeping problems                                                  | Sleep deprivation                          | Sleep Tiredness          | Sleep         | Sleep         | Sleep         | Sleep Tiredness        |

### Diary entry: P7

| <b>Participant: P7</b>                        | <b>Entry</b>                                         |                                                                                              |                                                                     |                                                                        |                                      | <b>Categories/Themes</b> |               |               |               |                        |
|-----------------------------------------------|------------------------------------------------------|----------------------------------------------------------------------------------------------|---------------------------------------------------------------------|------------------------------------------------------------------------|--------------------------------------|--------------------------|---------------|---------------|---------------|------------------------|
| <b>Prompt</b>                                 | <b>Week 1</b>                                        | <b>Week 2</b>                                                                                | <b>Week 3</b>                                                       | <b>Week 4</b>                                                          | <b>Summary</b>                       | <b>Week 1</b>            | <b>Week 2</b> | <b>Week 3</b> | <b>Week 4</b> | <b>Combined themes</b> |
| <i>Feelings about your progress this week</i> | Very positive about the way I feel real good         | I really feeling some pain. Painful whenever I lay down or try to get up back to do anything | When I wake up in the morning I still feeling pain in my lower back | Movement are much better. I still feeling a little pain inside my back | Positivity however slight discomfort | Positive (+)             | Pain          | Pain          | Movement      | Positive Pain Movement |
| <i>Feelings about your recovery so far</i>    | I'm better than before I know that I'm getting there | It really slow at this moment but I'm doing a lot of walking                                 | Has long as I do my exercise and walk thing will be ok              | Step by step. Better everyday                                          | Steady recovery, positive attitude   | Positive (+)             | Energy        | Energy        | Positive (+)  | Positive Energy        |

| <b>Participant: P7</b>                                                                                                                                                     | <b>Entry</b>                                                   |                                                   |                                                       |                                                   |                                     | <b>Categories/Themes</b> |               |               |               |                                  |
|----------------------------------------------------------------------------------------------------------------------------------------------------------------------------|----------------------------------------------------------------|---------------------------------------------------|-------------------------------------------------------|---------------------------------------------------|-------------------------------------|--------------------------|---------------|---------------|---------------|----------------------------------|
| <b>Prompt</b>                                                                                                                                                              | <b>Week 1</b>                                                  | <b>Week 2</b>                                     | <b>Week 3</b>                                         | <b>Week 4</b>                                     | <b>Summary</b>                      | <b>Week 1</b>            | <b>Week 2</b> | <b>Week 3</b> | <b>Week 4</b> | <b>Combined themes</b>           |
| <i>Level of motivation</i>                                                                                                                                                 | Feeling good                                                   | I'm feeling good with my legs each day as I go on | Everything I feel good within myself                  | Trying to do as much as possible. Is good         | Feeling better and well-motivated   | Positive (+)             | Movement      | Mood          | Energy        | Energy<br>Movement<br>Positive   |
| <i>Symptoms you have experienced over the past week</i>                                                                                                                    | None                                                           | None                                              | None                                                  | None                                              | No data                             | No data                  | No data       | No data       | No data       | No data                          |
| <i>Medications you have taken this week</i>                                                                                                                                | None                                                           | None                                              | None                                                  | None                                              | No data                             | No data                  | No data       | No data       | No data       | No data                          |
| <i>Healthcare appointments this week</i>                                                                                                                                   | It has been good news – 12/6/18 – 14/6/18                      | No                                                | No data                                               | None                                              | Acceptable access to healthcare     | Access                   | No data       | No data       | No data       | Access                           |
| <i>Rehabilitation progress this week</i><br>- <i>Your ability to exercise and do activity this week</i><br><i>Return to work / activities / hobbies as relevant to you</i> | Yes<br>Yes                                                     | I do my own exercise every day. I try to          | Yes<br>yes                                            | Fairly good<br><br>Not yet                        | Acceptable progress                 | Positive (+)             | Motivation    | Energy        | Energy        | Energy<br>Positive<br>Motivation |
| <i>Positive thought(s) this week</i>                                                                                                                                       | I try to do things that I feel that can help ne improve myself | Good                                              | I try to do more but it hurts if only I could do more | I'm happy so far to see how far I have come. Good | Self-motivation and driven          | Positive (+)             | Positive (+)  | Pain          | Positive (+)  | Positive<br>Pain                 |
| <i>Negative thought(s) this week</i>                                                                                                                                       | None                                                           | None                                              | None                                                  | None                                              | No data                             | No data                  | No data       | No data       | No data       | No data                          |
| <i>Most significant/memorable moment this week (may be positive or negative)</i>                                                                                           | Having fun exercising everyday                                 | I really don't have any but I try to be positive  | More positive to do things                            | When I'm trying to do more walking                | General feel good factor            | Positive (+)             | Positive      | Positive      | Energy        | Positive<br>Energy               |
| <i>Please describe how this week has been compared to last week</i>                                                                                                        | Each week I feel better than I do                              | Not bad 7/10                                      | I push myself to do more because I want               | Better than before and                            | Gradual improvement. Feeling better | Energy                   | Energy        | Energy        | Positive (+)  | Energy<br>Positive               |

| <b>Participant: P7</b>                                                                                                           | <b>Entry</b>                                                                                                                 |                                                                                     |                                                                                                                               |                                                                                         |                                  | <b>Categories/Themes</b> |               |               |               |                            |
|----------------------------------------------------------------------------------------------------------------------------------|------------------------------------------------------------------------------------------------------------------------------|-------------------------------------------------------------------------------------|-------------------------------------------------------------------------------------------------------------------------------|-----------------------------------------------------------------------------------------|----------------------------------|--------------------------|---------------|---------------|---------------|----------------------------|
| <b>Prompt</b>                                                                                                                    | <b>Week 1</b>                                                                                                                | <b>Week 2</b>                                                                       | <b>Week 3</b>                                                                                                                 | <b>Week 4</b>                                                                           | <b>Summary</b>                   | <b>Week 1</b>            | <b>Week 2</b> | <b>Week 3</b> | <b>Week 4</b> | <b>Combined themes</b>     |
|                                                                                                                                  | expect so my feel or good                                                                                                    |                                                                                     | to see how far I go. Try to it better                                                                                         | I'm happy. good                                                                         |                                  |                          |               |               |               |                            |
| <i>Please record any other comments you may like to make regarding how you have felt or your experiences over the past week?</i> | There are sometime I feel pain but I don't make it stop me do anything it's not easy but I have to keep it up no matter what | Just whenever I try to get up when I lay down at any time after walking or exercise | My experiences was great all feel well within my motivation of doing things and getting things done so that make me feel good | Everything that I have done I'm so please with my progress throughout this week so far. | Self-motivation, steady progress | Pain                     | Movement      | Energy        | Positive (+)  | Pain<br>Positive<br>Energy |

### Diary entry: P8

| <b>Participant: P8</b>                                  | <b>Entry</b>                                                                      |                                          |                                  |                                       |                                                           | <b>Categories/Themes</b> |               |               |               |                        |
|---------------------------------------------------------|-----------------------------------------------------------------------------------|------------------------------------------|----------------------------------|---------------------------------------|-----------------------------------------------------------|--------------------------|---------------|---------------|---------------|------------------------|
| <b>Prompt</b>                                           | <b>Week 1</b>                                                                     | <b>Week 2</b>                            | <b>Week 3</b>                    | <b>Week 4</b>                         | <b>Summary</b>                                            | <b>Week 1</b>            | <b>Week 2</b> | <b>Week 3</b> | <b>Week 4</b> | <b>Combined themes</b> |
| <i>Feelings about your progress this week</i>           | While in hospital I felt great On my return home I feel a little the disappointed | Up and down                              | Good                             | Great                                 | Generally good, but apprehensive coming home              | Anxiety                  | Positive (+)  | Positive (+)  | Positive (+)  | Anxiety<br>Positive    |
| <i>Feelings about your recovery so far</i>              | I feel optimistic no more sciatic pain bur still very sore                        | Good                                     | Good                             | Positive                              | Feeling optimistic and generally positive                 | Positive (+)             | Positive (+)  | Positive (+)  | Positive (+)  | Positive               |
| <i>Level of motivation</i>                              | High                                                                              | High                                     | High                             | Very High                             | Highly motivated                                          | Driven                   | Driven        | Driven        | Driven        | Driven                 |
| <i>Symptoms you have experienced over the past week</i> | Sharp Pain in my left side and buttock Bladder weakness and constipation          | Pain getting up and down in left buttock | Pain in my pelvis and right knee | Pain in my left knee and calf muscles | Sustained pain associated with surgery and other symptoms | Pain                     | Pain          | Pain          | Pain          | Pain                   |

| <b>Participant: P8</b>                                                                                                                                                     | <b>Entry</b>                                                                                                                                                                        |                                                                                       |                                                                                                                                                            |                                                                                        |                                          | <b>Categories/Themes</b> |               |               |                   |                                    |
|----------------------------------------------------------------------------------------------------------------------------------------------------------------------------|-------------------------------------------------------------------------------------------------------------------------------------------------------------------------------------|---------------------------------------------------------------------------------------|------------------------------------------------------------------------------------------------------------------------------------------------------------|----------------------------------------------------------------------------------------|------------------------------------------|--------------------------|---------------|---------------|-------------------|------------------------------------|
| <b>Prompt</b>                                                                                                                                                              | <b>Week 1</b>                                                                                                                                                                       | <b>Week 2</b>                                                                         | <b>Week 3</b>                                                                                                                                              | <b>Week 4</b>                                                                          | <b>Summary</b>                           | <b>Week 1</b>            | <b>Week 2</b> | <b>Week 3</b> | <b>Week 4</b>     | <b>Combined themes</b>             |
|                                                                                                                                                                            |                                                                                                                                                                                     |                                                                                       |                                                                                                                                                            |                                                                                        | linked to medication                     |                          |               |               |                   |                                    |
| <i>Medications you have taken this week</i>                                                                                                                                | 2xdaily tramadol100ml slow release<br>2x150ml daily pregabalin 4x 50ml tramadol daily                                                                                               | 2xdaily tramadol100ml slow release<br>2x150ml daily pregabalin 4x 50ml tramadol daily | Tramadol 100ml (both 2x daily tramadol 50ml)                                                                                                               | A few tramadol and ibuprofen                                                           | Awareness of how to manage medication    | Adherence Awareness      | Adherence     | Adherence     | Adherence         | Adherence                          |
| <i>Healthcare appointments this week</i>                                                                                                                                   | None                                                                                                                                                                                | Nurse and Physio                                                                      | Physio and nurse at practice                                                                                                                               | None                                                                                   | Access to healthcare                     | No data available        | Access        | Access        | Access            | Access                             |
| <i>Rehabilitation progress this week</i><br>- <i>Your ability to exercise and do activity this week</i><br><i>Return to work / activities / hobbies as relevant to you</i> | I have walked a little with the Physio team<br>I've exercised as shown in my post op guide<br>I've been given none of the second question                                           | As directed from hospital                                                             | I've been told to walk. I started with high goals. Which I have reduced a little                                                                           | I have walked 30 minutes each day tried to walk uphill to build up muscles and fitness | Sporadic follow-up and unstructured care | Access                   | Access        | Directed      | Energy Goal       | Energy Goal<br>Access              |
| <i>Positive thought(s) this week</i>                                                                                                                                       | This pain will get better day by day                                                                                                                                                | Had a big poo                                                                         | Stitches out and the wound is almost. Healed so no dressing. Needed                                                                                        | My back pain is beginning to be a memory                                               | Pathway to recovery under control        | Positive (+)             | Positive (+)  | Positive (+)  | Energy            | Energy<br>Positive (+)             |
| <i>Negative thought(s) this week</i>                                                                                                                                       | It hurts and I feel unsupported by the hospital now I'm home (i do the physio teams helpline to call if needed) Think I could do with a few aids at home to help e.g. The toilet is | Had to wait for the above until a toilet raiser was fitted 2 weeks post op            | I wish I had been informed I'd had a bone graft from my pelvis before my visit.to the Physio as I could not understand the pain I was getting in that area | None                                                                                   | Feeling unsupported by the system        | Pain<br>Unsupported      | Unsupported   | Information   | No data available | Unsupported<br>Information<br>Pain |

| Participant: P8                                                                                                                  | Entry                                                                                                                                                         |                                       |                                                                       |                                                                                                                           |                                    | Categories/Themes   |                     |                     |                     |                               |
|----------------------------------------------------------------------------------------------------------------------------------|---------------------------------------------------------------------------------------------------------------------------------------------------------------|---------------------------------------|-----------------------------------------------------------------------|---------------------------------------------------------------------------------------------------------------------------|------------------------------------|---------------------|---------------------|---------------------|---------------------|-------------------------------|
| Prompt                                                                                                                           | Week 1                                                                                                                                                        | Week 2                                | Week 3                                                                | Week 4                                                                                                                    | Summary                            | Week 1              | Week 2              | Week 3              | Week 4              | Combined themes               |
|                                                                                                                                  | too low and painful to sit down on. Also once I've got sat in bed I haven't anything to pull myself to standing position Which is also pay full and stressful |                                       |                                                                       |                                                                                                                           |                                    |                     |                     |                     |                     |                               |
| <i>Most significant/memorable moment this week (may be positive or negative)</i>                                                 | Walking for the first time without the sciatic pain Wonderful!!                                                                                               | Able to Use the toilet                | Walking home from the hospital.3 miles took me 2 hours but felt great | My birthday bbq ...I danced and felt full of fun and energy                                                               | Pain free and on tract to recovery | Energy Positive (+) | Positive (+) Energy | Positive (+) Mood   | Energy Positive (+) | Positive Mood Energy          |
| <i>Please describe how this week has been compared to last week</i>                                                              | I feel relief that I've finally had the op and it's a fresh start                                                                                             | Every day I feel better than the last | I've been able to do more and building.my muscles Back up             | I feel as though I am pain-free for the first time in 7 months                                                            | Improving and pain free            | Positive (+)        | Energy              | Energy              | Pain Hopeful        | Energy Positive (+) Hopeful   |
| <i>Please record any other comments you may like to make regarding how you have felt or your experiences over the past week?</i> | Staff have all been great ..food all nice                                                                                                                     | I hope you don't get 5 of this        | Enjoyed a bath and using public transport has been fun                | I have had so many compliments from friends and family who haven't seen me post op..10 years have been taken off my face. | Grateful for the support received  | Thankful            | Mood                | Energy Positive (+) | Thankful            | Thankful Energy Mood Positive |

**Diary entry: P9**

| <b>Participant: P9</b>                        | <b>Entry</b>                                                                                      |                                       |                                                                                |                                                                                                                                                                                                                                                                                                                                                                                                                                |                                             | <b>Categories/Themes</b> |                  |                |                   |                        |
|-----------------------------------------------|---------------------------------------------------------------------------------------------------|---------------------------------------|--------------------------------------------------------------------------------|--------------------------------------------------------------------------------------------------------------------------------------------------------------------------------------------------------------------------------------------------------------------------------------------------------------------------------------------------------------------------------------------------------------------------------|---------------------------------------------|--------------------------|------------------|----------------|-------------------|------------------------|
| <b>Prompt</b>                                 | <b>Week 1</b>                                                                                     | <b>Week 2</b>                         | <b>Week 3</b>                                                                  | <b>Week 4</b>                                                                                                                                                                                                                                                                                                                                                                                                                  | <b>Summary</b>                              | <b>Week 1</b>            | <b>Week 2</b>    | <b>Week 3</b>  | <b>Week 4</b>     | <b>Combined themes</b> |
| <i>Feelings about your progress this week</i> | Don't feel that much progress has been made pain is still a major factor in being able to do much | Things are much the same as last week | Progress is slow process which can be hard to see only little change at a time | Have had both good and bad feelings earlier on in the week I was questioning myself if I had done the right thing , but this passed after a few days once my pain had eased a little , I think I had been pushing myself thinking about the time that had passed and how I was still feeling. During the last few days I have been taking things a little slower but still getting small tasks completed such as ironing. This | Slow progress, anxious and mentally drained | Anxiety pain             | Anxiety Progress | Anxiety Energy | Pain Mood Anxiety | Anxiety Mood Pain      |



| <b>Participant: P9</b>                                  | <b>Entry</b>                                                    |                                                                                                        |                                                                                                                                                               |                                                                                                                    |                                                          | <b>Categories/Themes</b> |                    |                    |                      |                                            |
|---------------------------------------------------------|-----------------------------------------------------------------|--------------------------------------------------------------------------------------------------------|---------------------------------------------------------------------------------------------------------------------------------------------------------------|--------------------------------------------------------------------------------------------------------------------|----------------------------------------------------------|--------------------------|--------------------|--------------------|----------------------|--------------------------------------------|
| <b>Prompt</b>                                           | <b>Week 1</b>                                                   | <b>Week 2</b>                                                                                          | <b>Week 3</b>                                                                                                                                                 | <b>Week 4</b>                                                                                                      | <b>Summary</b>                                           | <b>Week 1</b>            | <b>Week 2</b>      | <b>Week 3</b>      | <b>Week 4</b>        | <b>Combined themes</b>                     |
|                                                         |                                                                 |                                                                                                        |                                                                                                                                                               | made my feelings on my progress more positive,                                                                     |                                                          |                          |                    |                    |                      |                                            |
| <i>Feelings about your recovery so far</i>              | Pain is limiting my ability to move forward as much as I like   | I have realised that its going to be a slow process                                                    | I feel that the recovery is slower than I thought it would be which can get you down some days                                                                | After speaking to family and friends I have come to see that my progress so far is positive                        | Acknowledgment that progress may be slow and progressive | Pain                     | Recognition        | Anxiety Awareness  | Positive (+) Support | Pain Recognition Anxiety Awareness Support |
| <i>Level of motivation</i>                              | Out of 10 level would be about 7                                | Out of 10, 7 again                                                                                     | Out of 10 : 6                                                                                                                                                 | Out of 10 : 6                                                                                                      | Adequate level of motivation                             | Positive (+)             | Positive (+)       | Positive (+)       | Positive (+)         | Positive                                   |
| <i>Symptoms you have experienced over the past week</i> | Pain in back pain in left leg only slight but feels much better | Back + leg pain weakness in legs continue                                                              | Back pain continues and depending on how much I have done I can also get burning down left leg into foot. At times left leg feels a bit weaker than the right | Still have lower back pain and pain in left leg and bottom that comes and goes depending on what I have been doing | General pain across back and leg                         | Pain                     | Pain               | Pain               | Pain                 | Pain                                       |
| <i>Medications you have taken this week</i>             | None                                                            | Gabapentine, paracetamol, zomorph, sertraline, lonzaprolol, epilim, mirabegren, diazepam, desmopressin | Gabapentin - 900mg Paracetamol Zomorph- 80mgs Sertraline 150mgs Lansprozol 15 mg Oxycodone as required                                                        | Gabapentin 900mgs Paracetamol Zomorph 80mgs Sertraline 150 MHz Lansprozol 15mgs Oxycodone as required              | Prescribed and as required                               | Adherence Required       | Adherence Required | Adherence Required | Adherence Required   | Adherence Required                         |

| <b>Participant: P9</b>                                                                                                                                                     | <b>Entry</b>                                                            |                                                                                                                        |                                                                                                          |                                                                                                                                           |                                                                                         | <b>Categories/Themes</b> |                |               |                   |                          |
|----------------------------------------------------------------------------------------------------------------------------------------------------------------------------|-------------------------------------------------------------------------|------------------------------------------------------------------------------------------------------------------------|----------------------------------------------------------------------------------------------------------|-------------------------------------------------------------------------------------------------------------------------------------------|-----------------------------------------------------------------------------------------|--------------------------|----------------|---------------|-------------------|--------------------------|
| <b>Prompt</b>                                                                                                                                                              | <b>Week 1</b>                                                           | <b>Week 2</b>                                                                                                          | <b>Week 3</b>                                                                                            | <b>Week 4</b>                                                                                                                             | <b>Summary</b>                                                                          | <b>Week 1</b>            | <b>Week 2</b>  | <b>Week 3</b> | <b>Week 4</b>     | <b>Combined themes</b>   |
| <i>Healthcare appointments this week</i>                                                                                                                                   | Practice nurse to remove dressing                                       | None                                                                                                                   | None                                                                                                     | None                                                                                                                                      | Appears inconsistent                                                                    | Access Limited           | No data        | No data       | No data           | No data                  |
| <i>Rehabilitation progress this week</i><br>- <i>Your ability to exercise and do activity this week</i><br><i>Return to work / activities / hobbies as relevant to you</i> | Limited to pain<br><br>Limited due to pain and medication concentration | Stayed in mostly but was more active in daily chores<br><br>Not at work and hobbies I do still not able to concentrate | Not yet back at work, I am able to do light house work and my body tells me when I need to stop and rest | No back at work Am trying to do things as my pain allows I feel that I am able to do more this week if take things slow                   | Affected by pain and medication                                                         | Pain reduce              | Mood           | Movement      | Pain Positive (+) | Mood Pain Positive       |
| <i>Positive thought(s) this week</i>                                                                                                                                       | Things can only get better I hope                                       | Can't believe how time goes quickly                                                                                    | I am able to move start to do more little things around the house                                        | That I can do things independently if I take it slowly having tests as required                                                           | Positive attitude and acknowledgement that progress is going to be progressive and slow | Positive (+)             | Positive (+)   | Movement      | Energy            | Positive Movement Energy |
| <i>Negative thought(s) this week</i>                                                                                                                                       | Confusion to why leg feels funny/weak                                   | Had a few days regretting having the operation due to pain                                                             | Thought that the recovery would be quicker and not as painful                                            | I want to be able to do more things like driving, but have been told to wait 6 weeks, and I don't feel ready yet anyway and is gets to me | Realisation that recovering is going to be slow and progressive                         | Anxiety                  | Pain           | Anxiety Mood  | Frustration       | Anxiety Mood Frustration |
| <i>Most significant/memorable moment this week (may be positive or negative)</i>                                                                                           | Returning home from hospital and being able to do small tasks           | The regret for having the operation done                                                                               | I am slowly starting to see little improvements                                                          | Talking to friends and family more about their thoughts on my progress so far, and getting                                                | Realisation recovery following surgery is mentally draining and frustrating at times    | Positive (+)             | Anxiety Regret | Positive      | Support           | Positive Anxiety Regret  |

| <b>Participant: P9</b>                                                                                                           | <b>Entry</b>              |                                                                           |                                                            |                                                                                                                           |                | <b>Categories/Themes</b> |               |               |               |                        |
|----------------------------------------------------------------------------------------------------------------------------------|---------------------------|---------------------------------------------------------------------------|------------------------------------------------------------|---------------------------------------------------------------------------------------------------------------------------|----------------|--------------------------|---------------|---------------|---------------|------------------------|
| <b>Prompt</b>                                                                                                                    | <b>Week 1</b>             | <b>Week 2</b>                                                             | <b>Week 3</b>                                              | <b>Week 4</b>                                                                                                             | <b>Summary</b> | <b>Week 1</b>            | <b>Week 2</b> | <b>Week 3</b> | <b>Week 4</b> | <b>Combined themes</b> |
|                                                                                                                                  |                           |                                                                           |                                                            | positive answers back , this lifted my mood and made me think that I am to hard on myself sometimes                       |                |                          |               |               |               |                        |
| <i>Please describe how this week has been compared to last week</i>                                                              | Was in hospital last week | Today I am slightly positive that all will go well and it just takes time | I can do more housework and small improvements can be seen | This week I have been able to do more things if I take my time , I have also realised more that I am making slow progress |                |                          |               |               |               |                        |
| <i>Please record any other comments you may like to make regarding how you have felt or your experiences over the past week?</i> | None                      | None                                                                      | None                                                       | None                                                                                                                      | No data        | No data                  | No data       | No data       | No data       | No data                |

**Diary entry: P10**

| <b>Participant: P10</b>                       | <b>Entry</b>                                                                                                                                                                                                                                               |                                                                                                                                                                                                                                                                               |                                                                                                                                                       |                                                                                                    |                                                                              | <b>Categories/Themes</b> |               |               |                 |                             |
|-----------------------------------------------|------------------------------------------------------------------------------------------------------------------------------------------------------------------------------------------------------------------------------------------------------------|-------------------------------------------------------------------------------------------------------------------------------------------------------------------------------------------------------------------------------------------------------------------------------|-------------------------------------------------------------------------------------------------------------------------------------------------------|----------------------------------------------------------------------------------------------------|------------------------------------------------------------------------------|--------------------------|---------------|---------------|-----------------|-----------------------------|
| <b>Prompt</b>                                 | <b>Week 1</b>                                                                                                                                                                                                                                              | <b>Week 2</b>                                                                                                                                                                                                                                                                 | <b>Week 3</b>                                                                                                                                         | <b>Week 4</b>                                                                                      | <b>Summary</b>                                                               | <b>Week 1</b>            | <b>Week 2</b> | <b>Week 3</b> | <b>Week 4</b>   | <b>Combined themes</b>      |
| <i>Feelings about your progress this week</i> | Very positive, awoke in recovery room immediately noticing that the underlying neuropathic pain down the back of my left leg had disappeared. First two days at home experienced mild to moderate pain around the base of my spine, but nothing excessive. | Not as good as the previous week, severe pain reaching a climax on Wednesday afternoon when the only position that I could get any degree of comfort was lying face down on the bed with a pillow supporting my stomach. Fortunately the pain started to recede from then on. | Much better than previous week, although still feeling original pain down the back of my left leg.                                                    | No progress from last week, still feeling original pain down the back of my left leg.              | Pathway to recovery appears to be slow and steady with period of severe pain | Positive (+)<br>Hopeful  | Pain          | Positive (+)  | Pain            | Pain<br>Positive<br>Hopeful |
| <i>Feelings about your recovery so far</i>    | I felt better than I had expected to at this point.                                                                                                                                                                                                        | Not so good, disappointingly the original pain down the back of my left leg started again on Thursday, not sure whether this is normal so a bit worried.                                                                                                                      | Still worried that the procedure may not have been a success as still having pain described above. Obtained an earlier appointment with my consultant | Still worried that the procedure may not have been a success as still having pain described above. | Mixed feeling about procedure and recovery                                   | Positive (+)             | Anxiety       | Anxiety       | Anxiety<br>Pain | Positive<br>Anxiety<br>Pain |
| <i>Level of motivation</i>                    | Very good, able to walk around the apartment with the aid of                                                                                                                                                                                               | Still good, able to walk around the apartment with the aid of                                                                                                                                                                                                                 | As last week still good, able to walk around the apartment                                                                                            | As last week still good, able to walk around the                                                   | Improved ability to walk                                                     | Movement                 | Positive (+)  | Positive (+)  | Pain            | Positive<br>Pain            |

| Participant: P10                                        | Entry                                                  |                                                                                                                                              |                                                                                                                                                                                                                                                 |                                                                                                                                                                                                                                                           |                                                                | Categories/Themes |        |        |              |                 |
|---------------------------------------------------------|--------------------------------------------------------|----------------------------------------------------------------------------------------------------------------------------------------------|-------------------------------------------------------------------------------------------------------------------------------------------------------------------------------------------------------------------------------------------------|-----------------------------------------------------------------------------------------------------------------------------------------------------------------------------------------------------------------------------------------------------------|----------------------------------------------------------------|-------------------|--------|--------|--------------|-----------------|
| Prompt                                                  | Week 1                                                 | Week 2                                                                                                                                       | Week 3                                                                                                                                                                                                                                          | Week 4                                                                                                                                                                                                                                                    | Summary                                                        | Week 1            | Week 2 | Week 3 | Week 4       | Combined themes |
|                                                         | crutches at frequent intervals.                        | one crutch at frequent intervals. Can't stay on my feet for more than 10 minutes or so due to pain building up down the back of my left leg. | with the aid of one crutch at frequent intervals. Can't stay on my feet for more than 10 minutes or so due to pain building up down the back of my left leg. Can walk without the aid of a crutch, but still using one in case of unsteadiness. | apartment with the aid of one crutch at frequent intervals. Can't stay on my feet for more than 10 minutes or so due to pain building up down the back of my left leg. Can walk without the aid of a crutch, but still using one in case of unsteadiness. |                                                                |                   |        |        |              |                 |
| <i>Symptoms you have experienced over the past week</i> | Mid to moderate pain around the site of the operation. | Severe to medium pain around the site of the operation. Painkillers appear to be keeping this at bay by the end of the week.                 | Mild pain around the site of the operation. Painkillers appear to be keeping this at bay                                                                                                                                                        | No pain around the site of the operation. Wound totally healed now, painless when touched. Amount of time that I can stay on my feet before recurrence of pain down the back of my left leg varies from day to day, would say 80/20 in favour of bad      | Varying degree of pain throughout especially around wound site | Pain              | Pain   | Pain   | Positive (+) | Positive Pain   |

| <b>Participant: P10</b>                                                                                                                                                    | <b>Entry</b>                                                       |                                                                                                                                                                                                         |                                                                                                                                                                        |                                                                                                        |                                     | <b>Categories/Themes</b> |                     |                     |                     |                        |
|----------------------------------------------------------------------------------------------------------------------------------------------------------------------------|--------------------------------------------------------------------|---------------------------------------------------------------------------------------------------------------------------------------------------------------------------------------------------------|------------------------------------------------------------------------------------------------------------------------------------------------------------------------|--------------------------------------------------------------------------------------------------------|-------------------------------------|--------------------------|---------------------|---------------------|---------------------|------------------------|
| <b>Prompt</b>                                                                                                                                                              | <b>Week 1</b>                                                      | <b>Week 2</b>                                                                                                                                                                                           | <b>Week 3</b>                                                                                                                                                          | <b>Week 4</b>                                                                                          | <b>Summary</b>                      | <b>Week 1</b>            | <b>Week 2</b>       | <b>Week 3</b>       | <b>Week 4</b>       | <b>Combined themes</b> |
|                                                                                                                                                                            |                                                                    |                                                                                                                                                                                                         |                                                                                                                                                                        | days.<br>Wednesday and Sunday were good days this week.                                                |                                     |                          |                     |                     |                     |                        |
| <i>Medications you have taken this week</i>                                                                                                                                | Amitriptylene, Toltoredine. Pregablin, Co-codamol and Oromorph     | Amitriptylene, Toltoredine. Pregablin, Co-codamol and Oromorph                                                                                                                                          | Amitriptylene, Toltoredine. Pregablin, Co-codamol and Oromorph                                                                                                         | Amitriptylene, Toltoredine. Pregablin, Co-codamol and Oramorph                                         | As prescribed                       | Adherence Awareness      | Adherence Awareness | Adherence Awareness | Adherence Awareness | Adherence Awareness    |
| <i>Healthcare appointments this week</i>                                                                                                                                   | none                                                               | District Nurse visited on Friday, says the wound is healing well with no sign of infection.                                                                                                             | District Nurse visited on Wednesday, says the wound is healing well with no sign of infection. Wound not requiring a dressing now. Signed off, no more visits planned. | None                                                                                                   | Access to health care professionals | No data                  | Access              | Access              | No data             | Access                 |
| <i>Rehabilitation progress this week</i><br>- <i>Your ability to exercise and do activity this week</i><br><i>Return to work / activities / hobbies as relevant to you</i> | Able to walk with the aid of crutches. Nothing else at this point. | Able to walk with the aid of one crutch. Doing exercises three times a day from Thursday onwards. Picked my guitar up a few times and played for five minutes or so during the latter part of the week. | Able to walk with the aid of one crutch. Doing exercises three times a day. Played guitar a few times.                                                                 | Able to walk with the aid of one crutch. Doing exercises three times a day. Played guitar a few times. | Ability to walk with crutches       | Movement                 | Movement            | Movement            | Movement            | Movement               |
| <i>Positive thought(s) this week</i>                                                                                                                                       |                                                                    | None                                                                                                                                                                                                    | Able to walk for longer periods.                                                                                                                                       | No problems with infection.                                                                            |                                     |                          |                     |                     |                     |                        |

| <b>Participant: P10</b>                                                                                                          | <b>Entry</b>                                                     |                                                                                                                                                           |                                                                              |                                                                              |                                               | <b>Categories/Themes</b> |               |               |               |                          |
|----------------------------------------------------------------------------------------------------------------------------------|------------------------------------------------------------------|-----------------------------------------------------------------------------------------------------------------------------------------------------------|------------------------------------------------------------------------------|------------------------------------------------------------------------------|-----------------------------------------------|--------------------------|---------------|---------------|---------------|--------------------------|
| <b>Prompt</b>                                                                                                                    | <b>Week 1</b>                                                    | <b>Week 2</b>                                                                                                                                             | <b>Week 3</b>                                                                | <b>Week 4</b>                                                                | <b>Summary</b>                                | <b>Week 1</b>            | <b>Week 2</b> | <b>Week 3</b> | <b>Week 4</b> | <b>Combined themes</b>   |
|                                                                                                                                  | Feeling optimistic about the outcome. Less pain than I expected. |                                                                                                                                                           | No problems with infection.                                                  | Wound completely healed.                                                     |                                               |                          |               |               |               |                          |
| <i>Negative thought(s) this week</i>                                                                                             | None                                                             | Feeling a bit down due to re-occurrence of original pain.                                                                                                 | As last week still feeling a bit down due to re-occurrence of original pain. | As last week still feeling a bit down due to re-occurrence of original pain. | Psychologically drained due to recurring pain | No data                  | Depression    | Depression    | Anxiety       | Anxiety<br>Depression    |
| <i>Most significant/memorable moment this week (may be positive or negative)</i>                                                 | Being discharged from hospital.                                  | Re-occurrence of original pain.                                                                                                                           | Re-occurrence of original pain still most significant problem.               | Re-occurrence of original pain still most significant problem.               | Recurring pain                                | Positive (+)             | Pain          | Pain          | Pain          | Pain                     |
| <i>Please describe how this week has been compared to last week</i>                                                              | N/A First week.                                                  | Much more painful than the previous week but subsided by the end of the week.                                                                             | Post-operative pain has receded from the previous week's level.              | No post-operative pain now.                                                  | Pain under control                            | No data                  | Pain          | Recede        | Energy        | Pain<br>Recede<br>Energy |
| <i>Please record any other comments you may like to make regarding how you have felt or your experiences over the past week?</i> | Discharged from Hospital so not much to report this week.        | The first few days after the operation were so good and free of severe pain that this week came as a big shock, I hadn't realized how painful it would be | None.                                                                        | None.                                                                        | Managing pain following surgery               | Positive (+)             | Pain          | No data       | No data       | Positive<br>Pain         |

## Diary entry: P11

| Participant: P11                                        | Entry                                            |                                                                               |                                                                              |                                                                                                                                                                                                                                                           |                                                     | Categories/Themes |        |              |                  |                                   |
|---------------------------------------------------------|--------------------------------------------------|-------------------------------------------------------------------------------|------------------------------------------------------------------------------|-----------------------------------------------------------------------------------------------------------------------------------------------------------------------------------------------------------------------------------------------------------|-----------------------------------------------------|-------------------|--------|--------------|------------------|-----------------------------------|
| Prompt                                                  | Week 1                                           | Week 2                                                                        | Week 3                                                                       | Week 4                                                                                                                                                                                                                                                    | Summary                                             | Week 1            | Week 2 | Week 3       | Week 4           | Combined themes                   |
| <i>Feelings about your progress this week</i>           | Slow but nice to be home                         | Slow but then I realised I could open a drawer which I couldn't do a week ago | Slow until I look bad and have achieved. No night light reduction in codeine | Slow - but I'm probably impatient                                                                                                                                                                                                                         | Slow progress                                       | Energy            | Energy | Positive (+) | Frustration      | Frustration<br>Energy<br>Positive |
| <i>Feelings about your recovery so far</i>              | Very slow                                        | Still got a long way to go                                                    | Slow                                                                         | Again slow - but as for last week until I look back. Achieved getting in my special sports car and a couple of run outs in it along with joining club members, who I've never met before, for breakfast. Still no desire to drive (or have any alcohol!!) | Slow recovery but hopeful with support from friends | Frustration       | Speed  | Speed        | Speed<br>Support | Speed<br>Support                  |
| <i>Level of motivation</i>                              | Got to carry on                                  | Slow and steady do what the body wants                                        | Must carry on I have no desire to remain incapacitated and rely on others    | I will continue to improve.                                                                                                                                                                                                                               | Slow recovery but desire to improve                 | Mood              | Energy | Mood         | Positive (+)     | Mood<br>Energy<br>Positive        |
| <i>Symptoms you have experienced over the past week</i> | Very limited bowel movement discomfort on peeing | Continued discomfort sore right calf lavatories problems continue             | Waking roughly every two hours in the night to wee                           | Reduction of pain. But 'night cramps' in right leg continue to make the                                                                                                                                                                                   | Symptoms include irregular bowel movement,          | Movement          | Pain   | Sleep        | Sleep<br>Pain    | Movement<br>Pain<br>Sleep         |



| Participant: P11                            | Entry   |                         |                                                                        |                                                                                                                                                                                                                                                                                                                                     |                       | Categories/Themes   |                     |                     |                     |                     |
|---------------------------------------------|---------|-------------------------|------------------------------------------------------------------------|-------------------------------------------------------------------------------------------------------------------------------------------------------------------------------------------------------------------------------------------------------------------------------------------------------------------------------------|-----------------------|---------------------|---------------------|---------------------|---------------------|---------------------|
| Prompt                                      | Week 1  | Week 2                  | Week 3                                                                 | Week 4                                                                                                                                                                                                                                                                                                                              | Summary               | Week 1              | Week 2              | Week 3              | Week 4              | Combined themes     |
|                                             |         |                         |                                                                        | stairs difficult (especially going down). Bowels can be reluctant to open and generally roughly every two hours I need a wee during the night, so sleep remains broken                                                                                                                                                              | disturb sleep pattern |                     |                     |                     |                     |                     |
| <i>Medications you have taken this week</i> | Codeine | Reducing codeine slowly | Paracetamol reducing codeine e.g. 2 on Saturday, 1 on Sunday, Movoicol | Stopped the dihydracodein. Only one or two paracetamol taken for bed. But taking supplements - fish oil as it can reduce inflammation and pills to increase gut bacteria which generally helps everything and zinc and copper - can't remember what the nutritionist says that helps, but I have seen it confirmed on the internet. | As prescribed         | Adherence Awareness | Adherence Awareness | Adherence Awareness | Adherence Awareness | Adherence Awareness |

| <b>Participant: P11</b>                                                                                                                                                    | <b>Entry</b>                                         |                                                                         |                                                                      |                                                                                                                                                                                                                                   |                            | <b>Categories/Themes</b> |               |               |                 |                              |
|----------------------------------------------------------------------------------------------------------------------------------------------------------------------------|------------------------------------------------------|-------------------------------------------------------------------------|----------------------------------------------------------------------|-----------------------------------------------------------------------------------------------------------------------------------------------------------------------------------------------------------------------------------|----------------------------|--------------------------|---------------|---------------|-----------------|------------------------------|
| <b>Prompt</b>                                                                                                                                                              | <b>Week 1</b>                                        | <b>Week 2</b>                                                           | <b>Week 3</b>                                                        | <b>Week 4</b>                                                                                                                                                                                                                     | <b>Summary</b>             | <b>Week 1</b>            | <b>Week 2</b> | <b>Week 3</b> | <b>Week 4</b>   | <b>Combined themes</b>       |
| <i>Healthcare appointments this week</i>                                                                                                                                   | Released from hospital on Thursday                   | Had clips removed from a lot larger than expected incision              | None                                                                 | None - although your researcher came to interview me and told me that my metal work is quite extensive - I had no idea and am looking forward, hopefully, to seeing the X-ray when I see the surgeon at the beginning of November | Healthcare access adequate | Positive (+)             | Access        | No data       | Access          | Access Positive              |
| <i>Rehabilitation progress this week</i><br>- <i>Your ability to exercise and do activity this week</i><br><i>Return to work / activities / hobbies as relevant to you</i> | All very limited just wait and managed stairs slowly | Aware that right leg is quite weak so concentrating on it on the stairs | Continue and extend walking do more chores around house e.g. laundry | Walking has improved - both in term of distance and speed, and, according to my neighbours, it no longer appears I am wearing a large nappy! No thoughts on returning to work or hobbies                                          | Making reasonable progress | Energy                   | Awareness     | Energy        | Speed<br>Energy | Energy<br>Awareness<br>Speed |
| <i>Positive thought(s) this week</i>                                                                                                                                       | None                                                 | 1/3 away through of coping with aeroplane socks                         | Nice to go out                                                       | Fantastic to be out in my beloved car                                                                                                                                                                                             | Managing recovery          | No data                  | Positive (+)  | Mood          | Mood            | Mood Positive                |

| <b>Participant: P11</b>                                                                          | <b>Entry</b>            |                                                                          |                                                                                 |                                                                                                                                                                                              |                                  | <b>Categories/Themes</b> |               |               |                  |                         |
|--------------------------------------------------------------------------------------------------|-------------------------|--------------------------------------------------------------------------|---------------------------------------------------------------------------------|----------------------------------------------------------------------------------------------------------------------------------------------------------------------------------------------|----------------------------------|--------------------------|---------------|---------------|------------------|-------------------------|
| <b>Prompt</b>                                                                                    | <b>Week 1</b>           | <b>Week 2</b>                                                            | <b>Week 3</b>                                                                   | <b>Week 4</b>                                                                                                                                                                                | <b>Summary</b>                   | <b>Week 1</b>            | <b>Week 2</b> | <b>Week 3</b> | <b>Week 4</b>    | <b>Combined themes</b>  |
| <i>Negative thought(s) this week</i>                                                             | None                    | none                                                                     | I hate being cold I got rather chilly on Saturday evening possibly did too much | I don't like being trapped beholden on others to take me out                                                                                                                                 | Unwilling to accept assistance   | No data                  | No data       | Energy        | Mood Frustration | Mood Frustration Energy |
| <i>Most significant/memorable moment this week (may be positive or negative)</i>                 | Getting out of hospital | Made soup and at in front of computer                                    | Going out for tea                                                               | Going out in my beloved car - with the extra bonus was that Saturday was a lovely sunny day                                                                                                  | Feeling independent              | Mood                     | Positive (+)  | Energy        | Energy Mood      | Mood Energy Positive    |
| <i>Please describe how this week has been compared to last week</i>                              | No data                 | Unaware of progress until think about it e.g. easier to access microwave | Can do more when looking for company. The same                                  | Further improvement when I look back, although I cannot really do any more tasks (all I really do is my own personal hygiene, the washing up and the laundry), those that I do I do quicker. | Good progress                    | No data                  | Positive (+)  | Positive (+)  | Speed            | Speed Positive          |
| <i>Please record any other comments you may like to make regarding how you have felt or your</i> | No data                 | No data                                                                  | More achievement. Can put on and take off compression stocking myself           | No data                                                                                                                                                                                      | Good progress and self-motivated | No data                  | No data       | Self-efficacy | No data          | Self-efficacy           |

| <b>Participant: P11</b>                | <b>Entry</b>  |               |                                                                                                                                                                                                                        |               |                | <b>Categories/Themes</b> |               |               |               |                        |
|----------------------------------------|---------------|---------------|------------------------------------------------------------------------------------------------------------------------------------------------------------------------------------------------------------------------|---------------|----------------|--------------------------|---------------|---------------|---------------|------------------------|
| <b>Prompt</b>                          | <b>Week 1</b> | <b>Week 2</b> | <b>Week 3</b>                                                                                                                                                                                                          | <b>Week 4</b> | <b>Summary</b> | <b>Week 1</b>            | <b>Week 2</b> | <b>Week 3</b> | <b>Week 4</b> | <b>Combined themes</b> |
| <i>experiences over the past week?</i> |               |               | so can have a shower whenever I want. Can load/unload hang out the washing without help. Wanted to be driver to town (1 mile) to do some shopping. Went to a farm shop for tea and had a nice drive round country side |               |                |                          |               |               |               |                        |

### Diary entry: P12

| <b>Participant: P12</b>                       | <b>Entry</b>                                                                   |                                                                                                                                        |                                                                                                                                                     |                                                                                                                                                              |                                           | <b>Categories/Themes</b> |               |               |                             |                                         |
|-----------------------------------------------|--------------------------------------------------------------------------------|----------------------------------------------------------------------------------------------------------------------------------------|-----------------------------------------------------------------------------------------------------------------------------------------------------|--------------------------------------------------------------------------------------------------------------------------------------------------------------|-------------------------------------------|--------------------------|---------------|---------------|-----------------------------|-----------------------------------------|
| <b>Prompt</b>                                 | <b>Week 1</b>                                                                  | <b>Week 2</b>                                                                                                                          | <b>Week 3</b>                                                                                                                                       | <b>Week 4</b>                                                                                                                                                | <b>Summary</b>                            | <b>Week 1</b>            | <b>Week 2</b> | <b>Week 3</b> | <b>Week 4</b>               | <b>Combined themes</b>                  |
| <i>Feelings about your progress this week</i> | Feel like I have not progressed that much, stood up and walked to the bathroom | Managed to walk upstairs prior to leaving hospital. Apart from walking up and down stairs I have walked outside the front of the house | Managed to sleep in bed. My Mom+Dad has given me their bed bars to assist in getting out of bed so I am a lot better but not feeling too daring yet | I am able to walk better this week. Managed to shop but was too far a struggled to get back. Slept for 2 hours when I got back, had to take more pain relief | Steady pace and cautious of not overdoing | Anxiety                  | Positive (+)  | Positive      | Fatigue<br>Anxiety<br>Sleep | Anxiety<br>Positive<br>Fatigue<br>Sleep |
| <i>Feelings about your recovery so far</i>    | Mentally pain and lack of sleep makes me feel I                                | Still only managing 1.5 hours sleep                                                                                                    | Much better walking better and a bit further                                                                                                        | Much better sleeping 3 hours up for                                                                                                                          | Slow and mentally draining.               | Mood<br>Sleep            | Sleep         | Positive (+)  | Sleep                       | Mood<br>Sleep<br>Positive               |

| <b>Participant: P12</b>                                 | <b>Entry</b>                                                      |                                                                                                                              |                                                                                                                                                                          |                                                                                                                                                                                         |                                            | <b>Categories/Themes</b> |               |               |               |                        |
|---------------------------------------------------------|-------------------------------------------------------------------|------------------------------------------------------------------------------------------------------------------------------|--------------------------------------------------------------------------------------------------------------------------------------------------------------------------|-----------------------------------------------------------------------------------------------------------------------------------------------------------------------------------------|--------------------------------------------|--------------------------|---------------|---------------|---------------|------------------------|
| <b>Prompt</b>                                           | <b>Week 1</b>                                                     | <b>Week 2</b>                                                                                                                | <b>Week 3</b>                                                                                                                                                            | <b>Week 4</b>                                                                                                                                                                           | <b>Summary</b>                             | <b>Week 1</b>            | <b>Week 2</b> | <b>Week 3</b> | <b>Week 4</b> | <b>Combined themes</b> |
|                                                         | have not started to recover                                       | before I wake up go to the toilet then 1.5 hours sleep. Sleeping on sofa                                                     |                                                                                                                                                                          | a toilet break, then 2 hours every night. Almost back to 7 hours a night                                                                                                                | Improved sleep patter                      |                          |               |               |               |                        |
| <i>Level of motivation</i>                              | No mention, I am tired of all pain and no sleep (-10)             | Due to no sleep I feel a lack of motivation. This got no better this week – 10 turned into a 0                               | As I can sit up without pain and can play games with the kids I am feeling happier probably up to a 4/5 from previous 0 score                                            | Motivation is ok. I want to get a routine going so I started to get up have breakfast and exercise then get showered light walk lunch sleep walk dinner bed for last 2 days of the week | Motivation affected by tiredness and pain. | Fatigue                  | Sleep         | Positive (+)  | Positive (+)  | Positive Sleep Fatigue |
| <i>Symptoms you have experienced over the past week</i> | Pain around area that was operated on, goes down leg in left side | Still pain in back and legs now are on fire. Can't feel the other parts on the top of thighs stinging/burning sensation only | Back pain severe when I relax lying down, aches and pains are constant but shooting pain down my left leg occurs I tense up and give myself a headache. Leg just as sore | Lower back pain is avoided by moving in ways to avoid it. Taking lower dose of aramorph 3mls twice a day                                                                                | Generalised pain around wound area         | Pain                     | Pain          | Pain          | Pain          | Pain                   |
| <i>Medications you have taken this week</i>             | Zomorph Oromorph Tramadol                                         | Zomorph Oromorph Senna                                                                                                       | Zomorph Oromorph Senna                                                                                                                                                   | All still being taken, 3 mls from                                                                                                                                                       | As prescribed                              | Adherence                | Adherence     | Adherence     | Adherence     | Adherence              |

| <b>Participant: P12</b>                                                                                                                                                    | <b>Entry</b>                                                                                                                 |                                                                                                                                 |                                                                                                                      |                                                                  |                                              | <b>Categories/Themes</b> |               |               |                         |                             |
|----------------------------------------------------------------------------------------------------------------------------------------------------------------------------|------------------------------------------------------------------------------------------------------------------------------|---------------------------------------------------------------------------------------------------------------------------------|----------------------------------------------------------------------------------------------------------------------|------------------------------------------------------------------|----------------------------------------------|--------------------------|---------------|---------------|-------------------------|-----------------------------|
| <b>Prompt</b>                                                                                                                                                              | <b>Week 1</b>                                                                                                                | <b>Week 2</b>                                                                                                                   | <b>Week 3</b>                                                                                                        | <b>Week 4</b>                                                    | <b>Summary</b>                               | <b>Week 1</b>            | <b>Week 2</b> | <b>Week 3</b> | <b>Week 4</b>           | <b>Combined themes</b>      |
|                                                                                                                                                                            | Paracetamol<br>Senna<br>Lactulose                                                                                            | Paracetamol<br>Osteocare<br>vitamin<br>Lactulose                                                                                | Paracetamol<br>Osteocare<br>vitamin<br>Lactulose<br>arnica                                                           | 5 mls of<br>oromorph<br>twice a day                              |                                              |                          |               |               |                         |                             |
| <i>Healthcare appointments this week</i>                                                                                                                                   | No data                                                                                                                      | No data                                                                                                                         | Doctors for wound dressing to be removed booked blood tests for Monday                                               | I had blood tests on Monday                                      | Appear to have limited access to health care | No data                  | No data       | Access        | Access                  | Access                      |
| <i>Rehabilitation progress this week</i><br>- <i>Your ability to exercise and do activity this week</i><br><i>Return to work / activities / hobbies as relevant to you</i> | Stood up day 1<br>Stood up and sat down and walked. Walked odd days. Sit down strengthen as I walked                         | Continue to walk out front of house. Tried a mobility electric chair to help me go up room. Sit down stretches as much as I can | Continuing to walk daily. Can't sit on floor yet to play with kids but close                                         | Walked further but went too far. Not sure what I should be doing | Motivation to stay mobile to aid recovery    | Movement                 | Movement      | Movement      | Movement<br>Frustration | Movement<br>Frustration     |
| <i>Positive thought(s) this week</i>                                                                                                                                       | Not had any.                                                                                                                 | Went to watch Layla swim, it was painful to sit but managed it                                                                  | Managing to sleep in won bed with my wife is great. Recently purchased the bed for £1,600 so sleeping in it is great | Thought about how I would be at work                             | Impact on psychological well-being           | Anxiety<br>Mood          | Positive (+)  | Mood          | Anxiety                 | Mood<br>Anxiety<br>Positive |
| <i>Negative thought(s) this week</i>                                                                                                                                       | Feel like it hasn't worked feel like I understand OP stressed just before OP as they said I wasn't going to have it. Then ok | Level of sleep is really manage it difficult I am pretty miserable                                                              | Confused to what I should/shouldn't be doing this is pissing me off at times as boredom has crept in massively       | Thought about how I would be at work                             | Cannot establish a proper plan of recovery   | Anxiety                  | Sleep         | Mood          | Anxiety                 | Anxiety<br>Sleep<br>Mood    |

| <b>Participant: P12</b>                                                                                                          | <b>Entry</b>                                                                                                                                                                                                                                                                                                                                                                                    |                                                                                                                             |                                                                                                                                                                                                                                                                                                                                                                                           |                                                                                                                                                        |                                     | <b>Categories/Themes</b> |               |                        |               |                                       |
|----------------------------------------------------------------------------------------------------------------------------------|-------------------------------------------------------------------------------------------------------------------------------------------------------------------------------------------------------------------------------------------------------------------------------------------------------------------------------------------------------------------------------------------------|-----------------------------------------------------------------------------------------------------------------------------|-------------------------------------------------------------------------------------------------------------------------------------------------------------------------------------------------------------------------------------------------------------------------------------------------------------------------------------------------------------------------------------------|--------------------------------------------------------------------------------------------------------------------------------------------------------|-------------------------------------|--------------------------|---------------|------------------------|---------------|---------------------------------------|
| <b>Prompt</b>                                                                                                                    | <b>Week 1</b>                                                                                                                                                                                                                                                                                                                                                                                   | <b>Week 2</b>                                                                                                               | <b>Week 3</b>                                                                                                                                                                                                                                                                                                                                                                             | <b>Week 4</b>                                                                                                                                          | <b>Summary</b>                      | <b>Week 1</b>            | <b>Week 2</b> | <b>Week 3</b>          | <b>Week 4</b> | <b>Combined themes</b>                |
| <i>Most significant/memorable moment this week (may be positive or negative)</i>                                                 | I walked                                                                                                                                                                                                                                                                                                                                                                                        | Got outside being very snappy to kids                                                                                       | Managing 3 hours un interrupted sleep was positive                                                                                                                                                                                                                                                                                                                                        | My stretching has allowed me to sit on floor to play with the kids                                                                                     | Psychologically challenging         | Movement                 | Mood          | Sleep                  | Positive (+)  | Movement<br>Mood<br>Sleep<br>Positive |
| <i>Please describe how this week has been compared to last week</i>                                                              | I could not compare                                                                                                                                                                                                                                                                                                                                                                             | A bit more mobile. Not where I want to be/expected to be                                                                    | Improved this week. To 40% to normal                                                                                                                                                                                                                                                                                                                                                      | Moved on 10% this week feel like I'm half way to recovery                                                                                              | Movement still restricted           | Frustration              | Movement      | Positive (+)           | Positive (+)  | Movement<br>Positive                  |
| <i>Please record any other comments you may like to make regarding how you have felt or your experiences over the past week?</i> | I severely underestimated this operation. I did not expect the operation to be 9 hours. I felt like I would be in pain but able to sleep and walk. I also was badly bruised on my head, chest, hip and feet. After being on the operating table this also hurts, is uncomfortable. Prior to the operation I was told I would need to quit smoking, to assist with recovery. So I slowed smoking | My level of expectation to walk I would be at able to walk was 60%/70% recovered. I am approximately half even less at 25%. | All operations, Dr at least big operations should come with a rough guide of what to expect on a weekly basis. Also the dos and dont's should be clear before being let out of hospital. I enjoyed my time in hospital as it gave me an insight to what nurses go through having only heard it from my wife but my discharge from hospital was like I was being kicked out. I didn't feel | I have concerns that my legs are not any different lump around my scar hurts when I lie on it. Where my drain was is sore and has gone into bum cheeks | Concern about the speed of recovery | Anxiety<br>Frustration   | Anxiety       | Anxiety<br>Frustration | Pain          | Anxiety<br>Frustration<br>Pain        |

| Participant: P12 | Entry                                                                                                                                                                                                                                                                                                                                  |        |                                                |        |         | Categories/Themes |        |        |        |                 |
|------------------|----------------------------------------------------------------------------------------------------------------------------------------------------------------------------------------------------------------------------------------------------------------------------------------------------------------------------------------|--------|------------------------------------------------|--------|---------|-------------------|--------|--------|--------|-----------------|
| Prompt           | Week 1                                                                                                                                                                                                                                                                                                                                 | Week 2 | Week 3                                         | Week 4 | Summary | Week 1            | Week 2 | Week 3 | Week 4 | Combined themes |
|                  | down and stopped prior to the operation. I was told on the day they would not do the operation. I was told on the day they would not do the operation due to me smoking still. I mix up in miscalculation almost cost me to not have the operation. If it was that important I would have quit when it was agreed to do the operation. |        | ready or clued up on what I had to when I left |        |         |                   |        |        |        |                 |

### Diary entry: P13

| Participant: P13                              | Entry                                                   |                                                                    |                                                                  |                                                                                                 |                                                                  | Categories/Themes |             |                 |              |                                            |
|-----------------------------------------------|---------------------------------------------------------|--------------------------------------------------------------------|------------------------------------------------------------------|-------------------------------------------------------------------------------------------------|------------------------------------------------------------------|-------------------|-------------|-----------------|--------------|--------------------------------------------|
| Prompt                                        | Week 1                                                  | Week 2                                                             | Week 3                                                           | Week 4                                                                                          | Summary                                                          | Week 1            | Week 2      | Week 3          | Week 4       | Combined themes                            |
| <i>Feelings about your progress this week</i> | Still having problems getting up from chair to standing | I feel I'm not making enough progress with regard to the back pain | Progress is very slow I need to sort my medication for back pain | I am not having pain down my left leg so feel the operation has done what it was supposed to do | Not enough progress has been achieved. Movement still restricted | Movement          | Frustration | Pain<br>Anxiety | Positive (+) | Movement<br>Frustration<br>Pain<br>Anxiety |



| <b>Participant: P13</b>                                 | <b>Entry</b>                                                                                                                                                                                                                                                                      |                                                                       |                                                                                             |                                                                        |                                                   | <b>Categories/Themes</b> |                     |                     |                     |                        |
|---------------------------------------------------------|-----------------------------------------------------------------------------------------------------------------------------------------------------------------------------------------------------------------------------------------------------------------------------------|-----------------------------------------------------------------------|---------------------------------------------------------------------------------------------|------------------------------------------------------------------------|---------------------------------------------------|--------------------------|---------------------|---------------------|---------------------|------------------------|
| <b>Prompt</b>                                           | <b>Week 1</b>                                                                                                                                                                                                                                                                     | <b>Week 2</b>                                                         | <b>Week 3</b>                                                                               | <b>Week 4</b>                                                          | <b>Summary</b>                                    | <b>Week 1</b>            | <b>Week 2</b>       | <b>Week 3</b>       | <b>Week 4</b>       | <b>Combined themes</b> |
| <i>Feelings about your recovery so far</i>              | I feel I need some physio                                                                                                                                                                                                                                                         | I haven't had pins and needles in my left leg as before the operation | I'm getting negative feelings about the pain                                                | No data                                                                | Feeling that follow-up care is inadequate         | Anxiety                  | Pain<br>Anxiety     | Anxiety             | No data             | Anxiety<br>Pain        |
| <i>Level of motivation</i>                              | Low                                                                                                                                                                                                                                                                               | Medium to low motivation                                              | Low                                                                                         | Low to medium                                                          | Motivation low throughout                         | Impetus (-)              | Impetus (-)         | Impetus (-)         | Impetus (-)         | Impetus                |
| <i>Symptoms you have experienced over the past week</i> | I seem to be leaning forward                                                                                                                                                                                                                                                      | Pain in my lower back                                                 | Back pain is my biggest problem                                                             | Back pain is no easier                                                 | General complain of back pain                     | Movement                 | Pain                | Pain                | Pain                | Movement<br>Pain       |
| <i>Medications you have taken this week</i>             | Aspirin 75mg daily, amitriptyline 10mg, 2xnight, adical 1500 mgx2 night, levothyroxine 100mg 1 daily vesicare 5mg 1 daily, Ramipril 1,25mg 1 daily, gabapentin 300mg 2x3 daily, arava 20mg 1 fdaily, bisoprolol 2.5mg 1 fdaily longtec 30mg, lansoprazole 30mg, atorvastatin 80mg | Same as before                                                        | As normal                                                                                   | Normal medication                                                      | As prescribed                                     | Adherence Awareness      | Adherence Awareness | Adherence Awareness | Adherence Awareness | Adherence Awareness    |
| <i>Healthcare appointments this week</i>                | No data                                                                                                                                                                                                                                                                           | Had the flu jab on the 10 <sup>th</sup> Nov                           | I saw my consultant he arranged for x rays on my spine. The x-ray shows that everything was | Spoke with my consultant about my arthritis and how much this is to do | Reassurance from Surgeon, other issues discussed. | No data                  | Access              | Access              | Access              | Access                 |

| <b>Participant: P13</b>                                                                                                                                                    | <b>Entry</b>                                               |                                                                            |                                                                   |                                                            |                                                            | <b>Categories/Themes</b> |                 |               |               |                             |
|----------------------------------------------------------------------------------------------------------------------------------------------------------------------------|------------------------------------------------------------|----------------------------------------------------------------------------|-------------------------------------------------------------------|------------------------------------------------------------|------------------------------------------------------------|--------------------------|-----------------|---------------|---------------|-----------------------------|
| <b>Prompt</b>                                                                                                                                                              | <b>Week 1</b>                                              | <b>Week 2</b>                                                              | <b>Week 3</b>                                                     | <b>Week 4</b>                                              | <b>Summary</b>                                             | <b>Week 1</b>            | <b>Week 2</b>   | <b>Week 3</b> | <b>Week 4</b> | <b>Combined themes</b>      |
|                                                                                                                                                                            |                                                            |                                                                            | normal regarding the operation                                    | with the back pain                                         |                                                            |                          |                 |               |               |                             |
| <i>Rehabilitation progress this week</i><br>- <i>Your ability to exercise and do activity this week</i><br><i>Return to work / activities / hobbies as relevant to you</i> | Still having pain on exercise                              | I am doing very little exercises due to back pain                          | No data                                                           | No data                                                    | Rehabilitation slow due to little activity                 | Pain                     | Anxiety         | No data       | No data       | Pain<br>Anxiety             |
| <i>Positive thought(s) this week</i>                                                                                                                                       | Hoping to improve                                          | Hoping to improve                                                          | My consultant said I was doing well and thought it was early days | Looking forward to Christmas with all the family           | Support from Surgeon appears to have a positive impact     | Positive (+)             | Positive (+)    | Support       | Mood          | Positive<br>Support         |
| <i>Negative thought(s) this week</i>                                                                                                                                       | Not getting any better                                     | Still having problems with mobility                                        | Still not improving enough                                        | Condition not getting any better                           | Recovery appears to be longer                              | Anxiety                  | Movement        | Anxiety       | Anxiety       | Movement<br>Anxiety         |
| <i>Most significant/memorable moment this week (may be positive or negative)</i>                                                                                           | Having to keep have a rest when walking                    | I managed to go up my daughters stairs with a little help                  | I managed to go to the hairdresser I sat for 2½ hours             | The pain in my lower back isn't improving                  | Pain is the main issue also related to level of energy     | Fatigue                  | Movement        | Movement      | Pain          | Fatigue<br>Pain<br>Movement |
| <i>Please describe how this week has been compared to last week</i>                                                                                                        | Mush the same                                              | Its still been the pain in the bottom of my back. Its shown no improvement | I am still struggling with pain the same                          | It's been about the same                                   | Sustained pain throughout                                  | Anxiety                  | Pain            | Pain          | Pain          | Pain<br>Anxiety             |
| <i>Please record any other comments you may like to make regarding how you have felt or your experiences over the past week?</i>                                           | I have pain in my left lower back so I can't walk very far | Nothing seem to be changing                                                | No data                                                           | The amount of pain I am still having is making my mood low | Mood and general psychological well-being affected by pain | Anxiety                  | Anxiety<br>Mood | No data       | Mood          | Mood<br>Anxiety             |

**Diary entry: P14**

| <b>Participant: P14</b>                       | <b>Entry</b>                                                                                                                                                                                                                                                                                                                                                                 |                                                                                                                                     |                                                                  |                                                |                    | <b>Categories/Themes</b>            |               |                     |               |                                 |
|-----------------------------------------------|------------------------------------------------------------------------------------------------------------------------------------------------------------------------------------------------------------------------------------------------------------------------------------------------------------------------------------------------------------------------------|-------------------------------------------------------------------------------------------------------------------------------------|------------------------------------------------------------------|------------------------------------------------|--------------------|-------------------------------------|---------------|---------------------|---------------|---------------------------------|
| <b>Prompt</b>                                 | <b>Week 1</b>                                                                                                                                                                                                                                                                                                                                                                | <b>Week 2</b>                                                                                                                       | <b>Week 3</b>                                                    | <b>Week 4</b>                                  | <b>Summary</b>     | <b>Week 1</b>                       | <b>Week 2</b> | <b>Week 3</b>       | <b>Week 4</b> | <b>Combined themes</b>          |
| <i>Feelings about your progress this week</i> | It was a very traumatic week as left hospital sooner than I thought as I was in only one night. I was walking very well when I left but the day after I could hardly walk or move. The effort to pull myself up the stairs and sit down on the toilet. The progress over the week since then has been very good as I can walk up the stairs without having to pull myself up | The week has been very up and down, some days good, not sure how much I can do so having to be really careful as not to overdue it. | I feel that my progress has slowed up after the initial healing. | Slow                                           | Mixed progress     | Movement<br>Anxiety<br>Positive (+) | Movement      | Movement<br>Anxiety | Movement      | Movement<br>Anxiety<br>Positive |
| <i>Feelings about your recovery so far</i>    | My recovery this first week after the op has been very up and down with the release of the sciatic nerve throwing up different problems. I am moving more freely than at the beginning of the                                                                                                                                                                                | Well I think that it's going alright at the moment but it's still early days.                                                       | It's felt like it's sort of levelled out                         | Still feels like it's not getting very far yet | Recovery very slow | Anxiety                             | Positive (+)  | Positive(+)         | Mood          | Anxiety<br>Positive<br>Mood     |

| Participant: P14                                        | Entry                                                                                                                                                                                                                                                                                                                                |                                                                                                                                                                                                 |                                                                                                                                                             |                                                                                                                                |                                                 | Categories/Themes   |              |         |             |                              |
|---------------------------------------------------------|--------------------------------------------------------------------------------------------------------------------------------------------------------------------------------------------------------------------------------------------------------------------------------------------------------------------------------------|-------------------------------------------------------------------------------------------------------------------------------------------------------------------------------------------------|-------------------------------------------------------------------------------------------------------------------------------------------------------------|--------------------------------------------------------------------------------------------------------------------------------|-------------------------------------------------|---------------------|--------------|---------|-------------|------------------------------|
| Prompt                                                  | Week 1                                                                                                                                                                                                                                                                                                                               | Week 2                                                                                                                                                                                          | Week 3                                                                                                                                                      | Week 4                                                                                                                         | Summary                                         | Week 1              | Week 2       | Week 3  | Week 4      | Combined themes              |
|                                                         | week. Not able to sleep up in bed no more than two hours at night before I have to come down and sleep in the recliner for the rest of the night                                                                                                                                                                                     |                                                                                                                                                                                                 |                                                                                                                                                             |                                                                                                                                |                                                 |                     |              |         |             |                              |
| <i>Level of motivation</i>                              | I would like to be able to do some of the simplest things for myself instead of relying on my wife to do as she suffers from Ankylosing Spondylitis. The extra things that she is having to do is tiring her out tremendously. To be able to do things for myself will make me feel better instead of having to rely on someone else | To be able to get back to do normal things                                                                                                                                                      | It's still to be able to help the wife and take some pressure off her with doing household things                                                           | It's still to be able to do more chores around the house to help the wife.                                                     | Emotionally drained, being unable to contribute | Anxiety Frustration | Positive (+) | Helpful | Frustration | Positive Anxiety Frustration |
| <i>Symptoms you have experienced over the past week</i> | Extreme pain in the lower back where I had the op. Agony in the left leg from the Sciatic nerve from when it was released by the op. Pain has subsided in the leg a lot since the                                                                                                                                                    | Had a lot of pain in the left leg and back earlier in the week. Left leg and hip aches a lot. Have found that I can't sleep in the bed yet for more than around 2 hours so have given up trying | Aching across the lower back and left hip. Stiffening up if I sit for too long and don't get up and move. Wound is still healing and the scabs are reducing | Aching in the muscles across the lower back and buttocks. Left hip aching. Scar tissue stings occasionally. Lower back and hip | General pain                                    | Pain                | Pain         | Pain    | Pain        | Pain                         |

| <b>Participant: P14</b>                                                                                 | <b>Entry</b>                                                                                                                                                                                                                     |                                                                                                             |                                                        |                                   |                                 | <b>Categories/Themes</b> |               |                         |               |                                              |
|---------------------------------------------------------------------------------------------------------|----------------------------------------------------------------------------------------------------------------------------------------------------------------------------------------------------------------------------------|-------------------------------------------------------------------------------------------------------------|--------------------------------------------------------|-----------------------------------|---------------------------------|--------------------------|---------------|-------------------------|---------------|----------------------------------------------|
| <b>Prompt</b>                                                                                           | <b>Week 1</b>                                                                                                                                                                                                                    | <b>Week 2</b>                                                                                               | <b>Week 3</b>                                          | <b>Week 4</b>                     | <b>Summary</b>                  | <b>Week 1</b>            | <b>Week 2</b> | <b>Week 3</b>           | <b>Week 4</b> | <b>Combined themes</b>                       |
|                                                                                                         | op. I've had a rash with peeling skin during the week which I had to have a home visit for. Had some side effects from the painkiller tablets I was prescribed from the hospital.                                                | and sleep in the recliner chair. Had one night where I couldn't sleep. I do get tired a lot during the day. |                                                        | stiffens up if I sit for too long |                                 |                          |               |                         |               |                                              |
| <i>Medications you have taken this week</i>                                                             | No data                                                                                                                                                                                                                          | Had an appointment with a nurse at the doctors on Thursday to check that the stitches had dissolved         | No data                                                | No data                           | No medication review            | No data                  | Review        | No data                 | No data       | Review                                       |
| <i>Healthcare appointments this week</i>                                                                | Had to get the wife to take my notes into the Doctors for more painkillers as not enough given to cover the first week. Had to have a home visit from the doctors to check out a rash with peeling skin. A cream was prescribed. | Getting up and walking about more to exercise the leg and hip and muscles in the lower back                 | None                                                   | None                              | Some but inadequate advice      | Frustration              | Movement      | No data                 | No data       | Frustration<br>Movement                      |
| <i>Rehabilitation progress this week</i><br>- <i>Your ability to exercise and do activity this week</i> | Wasn't given any exercises to do so not sure what is safe or not to do. I'm just walking, stretching my legs. Was told                                                                                                           | Getting up and walking about more to exercise the leg and hip and muscles in the lower back                 | Wasn't sure what I could do exercise or activity wise. | Standing and walking around more  | Inadequate instruction and help | Anxiety<br>Stress        | Movement      | Movement<br>Frustration | Movement      | Frustration<br>Anxiety<br>Stress<br>Movement |

| <b>Participant: P14</b>                                                          | <b>Entry</b>                                                                                                                                                                                                                                      |                                     |                                                                                       |                                              |                                                                      | <b>Categories/Themes</b> |                 |                       |               |                                |
|----------------------------------------------------------------------------------|---------------------------------------------------------------------------------------------------------------------------------------------------------------------------------------------------------------------------------------------------|-------------------------------------|---------------------------------------------------------------------------------------|----------------------------------------------|----------------------------------------------------------------------|--------------------------|-----------------|-----------------------|---------------|--------------------------------|
| <b>Prompt</b>                                                                    | <b>Week 1</b>                                                                                                                                                                                                                                     | <b>Week 2</b>                       | <b>Week 3</b>                                                                         | <b>Week 4</b>                                | <b>Summary</b>                                                       | <b>Week 1</b>            | <b>Week 2</b>   | <b>Week 3</b>         | <b>Week 4</b> | <b>Combined themes</b>         |
| <i>Return to work / activities / hobbies as relevant to you</i>                  | not to lift anything heavy but not sure what is actually heavy and for how long I'm not supposed to not lift. I've been doing little bits of things to keep myself occupied but I'm not supposed to lift up my laptop so have to rely on my wife. |                                     |                                                                                       |                                              |                                                                      |                          |                 |                       |               |                                |
| <i>Positive thought(s) this week</i>                                             | Not had any                                                                                                                                                                                                                                       | Moving a little better              | To achieve more by moving about                                                       | Went out the house twice this week on trips. | Speed up recovery and a return to normal activity                    | Positive (-)             | Movement        | Movement Positive (-) | Social        | Social Movement Positive       |
| <i>Negative thought(s) this week</i>                                             | Why did I do it.                                                                                                                                                                                                                                  | So unsure of what I can do safely   | Frustrated on the limitation on what I can do and still not able to sleep in the bed. | The trips really tired me out.               | Frustrated because of pain, discomfort and limitation due to surgery | Frustration              | Anxiety         | Frustration           | Fatigue       | Fatigue Frustration Anxiety    |
| <i>Most significant/memorable moment this week (may be positive or negative)</i> | Able to get down and up off the toilet easily. Climbed the stairs and walked down them without struggling                                                                                                                                         | Walking better                      | Had a friend visit                                                                    | Had my birthday and went out for the day     | Mobility improved and socialising                                    | Movement                 | Movement Energy | Support               | Social        | Movement Support Social Energy |
| <i>Please describe how this week has been compared to last week</i>              | Last week I hadn't had the op. This week very                                                                                                                                                                                                     | Less pain from the actual operation | Just a slight improvement on my movement                                              | A little improvement in movement,            | Slow improvement in mobility                                         | Pain Stress              | Positive (+)    | Anxiety               | Movement Slow | Pain Positive Movement Anxiety |

| <b>Participant: P14</b>                                                                                                          | <b>Entry</b>                                                                                                                                                                                                                                                                                                                              |                                                                                                          |                                                                         |                                                                                                                                                                   |                                  | <b>Categories/Themes</b> |               |               |                  |                                     |
|----------------------------------------------------------------------------------------------------------------------------------|-------------------------------------------------------------------------------------------------------------------------------------------------------------------------------------------------------------------------------------------------------------------------------------------------------------------------------------------|----------------------------------------------------------------------------------------------------------|-------------------------------------------------------------------------|-------------------------------------------------------------------------------------------------------------------------------------------------------------------|----------------------------------|--------------------------|---------------|---------------|------------------|-------------------------------------|
| <b>Prompt</b>                                                                                                                    | <b>Week 1</b>                                                                                                                                                                                                                                                                                                                             | <b>Week 2</b>                                                                                            | <b>Week 3</b>                                                           | <b>Week 4</b>                                                                                                                                                     | <b>Summary</b>                   | <b>Week 1</b>            | <b>Week 2</b> | <b>Week 3</b> | <b>Week 4</b>    | <b>Combined themes</b>              |
|                                                                                                                                  | painful and stressful                                                                                                                                                                                                                                                                                                                     |                                                                                                          | but not much else.                                                      | recovery has seemed too slowed up.                                                                                                                                |                                  |                          |               |               |                  |                                     |
| <i>Please record any other comments you may like to make regarding how you have felt or your experiences over the past week?</i> | Not enough information was forth coming about what aftercare would be needed or precisely what I could or could not do. The wife was getting stressed about that fact. I had to had a hand rail fitted to the toilet wall so that I could get up and down on the toilet. Felt very frustrated and down with the pain and the helplessness | Not felt so good in myself, a little down. Not liking seeing my wife having to struggle to do everything | Have felt very frustrated and low with not knowing my capability limits | It's been difficult to get a balance between sitting down and standing up and walking around. Too much of each can hurt. Kept falling asleep during the day a lot | Issues with follow-up healthcare | Inadequate               | Anxiety Mood  | Frustration   | Mood Frustration | Mood Frustration Anxiety Inadequate |

### Diary entry: P15

| <b>Participant: P15</b>                       | <b>Entry</b>                                             |                                                            |                           |               |                                   | <b>Categories/Themes</b> |                       |                       |               |                         |
|-----------------------------------------------|----------------------------------------------------------|------------------------------------------------------------|---------------------------|---------------|-----------------------------------|--------------------------|-----------------------|-----------------------|---------------|-------------------------|
| <b>Prompt</b>                                 | <b>Week 1</b>                                            | <b>Week 2</b>                                              | <b>Week 3</b>             | <b>Week 4</b> | <b>Summary</b>                    | <b>Week 1</b>            | <b>Week 2</b>         | <b>Week 3</b>         | <b>Week 4</b> | <b>Combined themes</b>  |
| <i>Feelings about your progress this week</i> | Great progress now mostly clear of pre-existing leg pain | Progress continues slowly following last week's great gain | Progress continues slowly | No data       | Steady progress                   | Movement                 | Movement Positive (+) | Movement Positive (+) | No data       | Movement Positive       |
| <i>Feelings about your recovery so far</i>    | Wound healed (finally)                                   | Happy but could do with more                               | Pleased with progress     | No data       | Reasonable progress with recovery | Movement Speed           | Movement Positive (-) | Positive (-)          | No data       | Positive Movement Speed |

| <b>Participant: P15</b>                                                                                                                                                    | <b>Entry</b>                                                                       |                                                                                               |                                                                                                                                                     |               |                                                    | <b>Categories/Themes</b> |                 |                     |               |                        |
|----------------------------------------------------------------------------------------------------------------------------------------------------------------------------|------------------------------------------------------------------------------------|-----------------------------------------------------------------------------------------------|-----------------------------------------------------------------------------------------------------------------------------------------------------|---------------|----------------------------------------------------|--------------------------|-----------------|---------------------|---------------|------------------------|
| <b>Prompt</b>                                                                                                                                                              | <b>Week 1</b>                                                                      | <b>Week 2</b>                                                                                 | <b>Week 3</b>                                                                                                                                       | <b>Week 4</b> | <b>Summary</b>                                     | <b>Week 1</b>            | <b>Week 2</b>   | <b>Week 3</b>       | <b>Week 4</b> | <b>Combined themes</b> |
|                                                                                                                                                                            | Was hoping for more progress with pre-existing pain                                | guidance on exercise.                                                                         |                                                                                                                                                     |               |                                                    |                          |                 |                     |               |                        |
| <i>Level of motivation</i>                                                                                                                                                 | OK. Wish I knew what exercise to take. I am frightened to do much without guidance | OK. Wish I knew what exercise to take. Seeing Consultant next week and will raise the subject | OK                                                                                                                                                  | No data       | Need some guidance to conduct exercise             | Anxiety                  | Anxiety         | Positive (-)        | No data       | Anxiety<br>Positive    |
| <i>Symptoms you have experienced over the past week</i>                                                                                                                    | General back pain.<br>Tiredness                                                    | General back pain.<br>Tiredness                                                               | General back pain.<br>Tiredness                                                                                                                     | No data       | Tiredness and pain                                 | Pain<br>Fatigue          | Pain<br>Fatigue | Pain<br>Fatigue     | No data       | Pain<br>Fatigue        |
| <i>Medications you have taken this week</i>                                                                                                                                | Paracetamol                                                                        | Paracetamol                                                                                   | Paracetamol                                                                                                                                         | No data       | As prescribed                                      | Awareness                | Awareness       | Awareness           | No data       | Awareness              |
| <i>Healthcare appointments this week</i>                                                                                                                                   | None                                                                               | None                                                                                          | Specialist 6 week follow up                                                                                                                         | No data       | Limited access                                     | No data                  | No data         | Access              | No data       | Access                 |
| <i>Rehabilitation progress this week</i><br>- <i>Your ability to exercise and do activity this week</i><br><i>Return to work / activities / hobbies as relevant to you</i> | Taking it easy with no lifting as directed                                         | Taking it easy with no lifting as directed                                                    | Taking it easy with no lifting as directed<br>I am advised to take no activity beyond walking and no physiotherapy before next appointment in June! | No data       | Advice and support given to exercise appropriately | Movement                 | Movement        | Movement<br>Support | No data       | Movement<br>Support    |
| <i>Positive thought(s) this week</i>                                                                                                                                       | Great relief to be making progress on sciatic pain at last                         | Great relief to be making progress on sciatic pain at last                                    | Great relief to be making progress on sciatic pain at last                                                                                          | No data       | Relief to be making progress                       | Positive (+)             | Positive (+)    | Positive (+)        | No data       | Positive               |



| <b>Participant: P15</b>                                                                                                          | <b>Entry</b>  |               |               |               |                | <b>Categories/Themes</b> |               |               |               |                        |
|----------------------------------------------------------------------------------------------------------------------------------|---------------|---------------|---------------|---------------|----------------|--------------------------|---------------|---------------|---------------|------------------------|
| <b>Prompt</b>                                                                                                                    | <b>Week 1</b> | <b>Week 2</b> | <b>Week 3</b> | <b>Week 4</b> | <b>Summary</b> | <b>Week 1</b>            | <b>Week 2</b> | <b>Week 3</b> | <b>Week 4</b> | <b>Combined themes</b> |
| <i>Negative thought(s) this week</i>                                                                                             | No data       | No data       | No data       | No data       | No data        | No data                  | No data       | No data       | No data       | No data                |
| <i>Most significant/memorable moment this week (may be positive or negative)</i>                                                 | No data       | No data       | No data       | No data       | No data        | No data                  | No data       | No data       | No data       | No data                |
| <i>Please describe how this week has been compared to last week</i>                                                              | Better        | No data       | No data       | No data       | Limited input  | Positive (-)             | No data       | No data       | No data       | Positive               |
| <i>Please record any other comments you may like to make regarding how you have felt or your experiences over the past week?</i> | No data       | No data       | No data       | No data       | No data        | No data                  | No data       | No data       | No data       | No data                |

### Diary entry: P16

| <b>Participant: P16</b>                       | <b>Entry</b>                                        |                        |                                                                   |               |                          | <b>Categories/Themes</b> |               |               |               |                           |
|-----------------------------------------------|-----------------------------------------------------|------------------------|-------------------------------------------------------------------|---------------|--------------------------|--------------------------|---------------|---------------|---------------|---------------------------|
| <b>Prompt</b>                                 | <b>Week 1</b>                                       | <b>Week 2</b>          | <b>Week 3</b>                                                     | <b>Week 4</b> | <b>Summary</b>           | <b>Week 1</b>            | <b>Week 2</b> | <b>Week 3</b> | <b>Week 4</b> | <b>Combined themes</b>    |
| <i>Feelings about your progress this week</i> | Steady progress over the last 4/5 weeks as expected | Still early days       | Still a lot of leg pain                                           | No data       | Steady progress          | Positive (+)             | Speed         | Pain          | No data       | Pain<br>Speed<br>Positive |
| <i>Feelings about your recovery so far</i>    | Still feels slow, but to be expected                | Slow but expected      | My consultant says it could have up to 4 months signs of recovery | No data       | Advice and encouragement | Speed                    | Speed         | Support       | No data       | Speed<br>Support          |
| <i>Level of motivation</i>                    | Good positive mental approach                       | Still feeling positive | Weather not helping                                               | No data       | Overall positive         | Positive (+)             | Positive (+)  | Mood          | No data       | Positive<br>Mood          |

| <b>Participant: P16</b>                                                                                                                                                    | <b>Entry</b>                                                          |                                                            |                           |               |                                                             | <b>Categories/Themes</b> |               |               |               |                        |
|----------------------------------------------------------------------------------------------------------------------------------------------------------------------------|-----------------------------------------------------------------------|------------------------------------------------------------|---------------------------|---------------|-------------------------------------------------------------|--------------------------|---------------|---------------|---------------|------------------------|
| <b>Prompt</b>                                                                                                                                                              | <b>Week 1</b>                                                         | <b>Week 2</b>                                              | <b>Week 3</b>             | <b>Week 4</b> | <b>Summary</b>                                              | <b>Week 1</b>            | <b>Week 2</b> | <b>Week 3</b> | <b>Week 4</b> | <b>Combined themes</b> |
|                                                                                                                                                                            |                                                                       |                                                            |                           |               | outlook to recovery                                         |                          |               |               |               |                        |
| <i>Symptoms you have experienced over the past week</i>                                                                                                                    | Unable to do much warm weather                                        | Back pain eased still leg pains                            | No data                   | No data       | Restricted movement due to inclement weather                | Movement                 | pain          | No data       | No data       | Movement Pain          |
| <i>Medications you have taken this week</i>                                                                                                                                | Painkiller – warfarin                                                 | Usual medication prescription enclosed                     | Usual                     | No data       | As prescribed                                               | Adherence                | Adherence     | No data       | No data       | Adherence              |
| <i>Healthcare appointments this week</i>                                                                                                                                   | Physio on 11.10.18. trying hand held crutches to keep me more upright | INR was 2.7-3mg by day. My consultant please with progress | None                      | No data       | Access to healthcare                                        | Access                   | Access        | No data       | No data       | Access                 |
| <i>Rehabilitation progress this week</i><br>- <i>Your ability to exercise and do activity this week</i><br><i>Return to work / activities / hobbies as relevant to you</i> | The weather has limited me for outside                                | Continuing with exercises                                  | No data                   | No data       | Continue with exercises but restricted by weather condition | Frustrated               | Positive (+)  | No data       | No data       | Frustrated Positive    |
| <i>Positive thought(s) this week</i>                                                                                                                                       | Still leg pain but different to back pain prior to operation          | Positivity from My consultant                              | No data                   | No data       | Staying positive because of advice from Surgeon             | Pain                     | Positive (+)  | No data       | No data       | Pain Positive          |
| <i>Negative thought(s) this week</i>                                                                                                                                       | No negative thoughts yet still early days                             | Seems slow                                                 | No data                   | No data       | Slow but positive thoughts                                  | Positive                 | Speed         | No data       | No data       | Positive Speed         |
| <i>Most significant/memorable moment this week (may be positive or negative)</i>                                                                                           | Physio supplies me with crutches to help with my posture              | No data                                                    | Walked around meadow hall | No data       | Support from healthcare professionals. Continue to walk     | Positive (+)             | No data       | Movement      | No data       | Positive Movement      |
| <i>Please describe how this week has been compared to last week</i>                                                                                                        | Steady progress                                                       | No data                                                    | No data                   | No data       | Steady progress                                             | Positive (+)             | No data       | No data       | No data       | Positive               |

| <b>Participant: P16</b>                                                                                                          | <b>Entry</b>  |               |               |               |                 | <b>Categories/Themes</b> |               |               |               |                        |
|----------------------------------------------------------------------------------------------------------------------------------|---------------|---------------|---------------|---------------|-----------------|--------------------------|---------------|---------------|---------------|------------------------|
| <b>Prompt</b>                                                                                                                    | <b>Week 1</b> | <b>Week 2</b> | <b>Week 3</b> | <b>Week 4</b> | <b>Summary</b>  | <b>Week 1</b>            | <b>Week 2</b> | <b>Week 3</b> | <b>Week 4</b> | <b>Combined themes</b> |
| <i>Please record any other comments you may like to make regarding how you have felt or your experiences over the past week?</i> | Early days    | No data       | No data       | No data       | Steady progress | Optimistic               | No data       | No data       | No data       | Optimistic             |

### Diary entry: P17

| <b>Participant: P17</b>                                 | <b>Entry</b>                                                     |                                                                                                                      |                                                                          |                                                                                    |                     | <b>Categories/Themes</b> |               |               |                 |                        |
|---------------------------------------------------------|------------------------------------------------------------------|----------------------------------------------------------------------------------------------------------------------|--------------------------------------------------------------------------|------------------------------------------------------------------------------------|---------------------|--------------------------|---------------|---------------|-----------------|------------------------|
| <b>Prompt</b>                                           | <b>Week 1</b>                                                    | <b>Week 2</b>                                                                                                        | <b>Week 3</b>                                                            | <b>Week 4</b>                                                                      | <b>Summary</b>      | <b>Week 1</b>            | <b>Week 2</b> | <b>Week 3</b> | <b>Week 4</b>   | <b>Combined themes</b> |
| <i>Feelings about your progress this week</i>           | I am feeling pain in my back                                     | The pain is getting worse every day                                                                                  | The pain is still very bad and painful                                   | The pain is still on my back and both legs                                         | Experiencing pain   | Pain                     | Pain          | Pain          | Movement Pain   | Pain Movement          |
| <i>Feelings about your recovery so far</i>              | Very bad unable to walk properly and both feet are still swollen | None- still feeling pain on my bottoms, cannot sit down or lie down on the bed it is very painful                    | Still very weak                                                          | Feeling weak                                                                       | Very slow recovery  | Anxiety                  | Pain          | Movement (-)  | Movement (-)    | Movement Pain Anxiety  |
| <i>Level of motivation</i>                              | None                                                             | Very weak not much feeling, both legs are weak                                                                       | None                                                                     | None                                                                               | Low motivation      | Anxiety                  | Movement (-)  | Anxiety       | Anxiety         | Anxiety Movement       |
| <i>Symptoms you have experienced over the past week</i> | Not much without a stick                                         | When going out I have to use the stick and my body is bending down look like my head and body is going down. My body | Walking outside with the help of a stick but today is going down forward | Still have to use a stick to walk- the body is bending feel like I am falling down | Restricted movement | Pain                     | Pain          | Pain          | Pain discomfort | Pain Discomfort        |

| Participant: P17                                                                                                                                                           | Entry                                                             |                                                          |                                                 |                                          | Summary                      | Categories/Themes   |                     |                     |                     | Combined themes     |
|----------------------------------------------------------------------------------------------------------------------------------------------------------------------------|-------------------------------------------------------------------|----------------------------------------------------------|-------------------------------------------------|------------------------------------------|------------------------------|---------------------|---------------------|---------------------|---------------------|---------------------|
|                                                                                                                                                                            | Week 1                                                            | Week 2                                                   | Week 3                                          | Week 4                                   |                              | Week 1              | Week 2              | Week 3              | Week 4              |                     |
|                                                                                                                                                                            |                                                                   | is bend down all the time                                |                                                 |                                          |                              |                     |                     |                     |                     |                     |
| <i>Medications you have taken this week</i>                                                                                                                                | Paracetamol 500mg, 2x3 a day, Senna 300mg 1 three times a day     | Paracetamol 500mg 2x3 a day, Gabapentine 300mg 1x3 a day | Paracetamol, Gabapentine                        | Paracetamol, Gabapentine                 | As prescribed                | Adherence Awareness | Adherence Awareness | Adherence Awareness | Adherence Awareness | Adherence Awareness |
| <i>Healthcare appointments this week</i>                                                                                                                                   | Very painful and feeling weak and terrible in the morning (shaky) | Very bad experience and suffering                        | Very bad                                        | Still the same pain                      | Limited as required          | No data             | No data             | Access              | Access              | Access              |
| <i>Rehabilitation progress this week</i><br>- <i>Your ability to exercise and do activity this week</i><br><i>Return to work / activities / hobbies as relevant to you</i> | None                                                              | None                                                     | None                                            | None                                     | Walking at a reasonable pace | Anxiety             | Positive (+)        | Positive (+)        | Positive (+)        | Anxiety Positive    |
| <i>Positive thought(s) this week</i>                                                                                                                                       | None, doing exercise everyday don't work                          | None, doing exercise everyday don't work                 | None, doing exercise everyday don't work        | None, doing exercise everyday don't work | Frustration, anxiety         | Anxiety             | Anxiety             | Anxiety             | Anxiety             | Anxiety             |
| <i>Negative thought(s) this week</i>                                                                                                                                       | Negative                                                          | Negative                                                 | Negative                                        | Negative                                 | Negative                     | Anxiety             | Anxiety             | Anxiety             | Anxiety             | Anxiety             |
| <i>Most significant/memorable moment this week (may be positive or negative)</i>                                                                                           | None                                                              | None                                                     | None                                            | None                                     | None                         | Anxiety             | Anxiety             | Anxiety             | Anxiety             | Anxiety             |
| <i>Please describe how this week has been compared to last week</i>                                                                                                        | Negative                                                          | Negative                                                 | Negative                                        | Negative                                 | Anxiety                      | Anxiety             | Anxiety             | Anxiety             | Anxiety             | Anxiety             |
| <i>Please record any other comments you may like to make</i>                                                                                                               | Getting worse                                                     | Still feeling weak and pain like some metal part         | Still unable to go out alone but have to go out | Still unable to walk I got feeling I am  | Overall related to pain      | Mood                | Pain                | Pain                | Support             | Mood Pain Support   |

| Participant: P17                                                           | Entry  |                        |                                                                                                                               |                                                                    |                | Categories/Themes |        |        |        |                 |
|----------------------------------------------------------------------------|--------|------------------------|-------------------------------------------------------------------------------------------------------------------------------|--------------------------------------------------------------------|----------------|-------------------|--------|--------|--------|-----------------|
| Prompt                                                                     | Week 1 | Week 2                 | Week 3                                                                                                                        | Week 4                                                             | Summary        | Week 1            | Week 2 | Week 3 | Week 4 | Combined themes |
| <i>regarding how you have felt or your experiences over the past week?</i> |        | hurting me and I can't | with my wife and walk with a stick after a couple of sheet. My body bending down and I cannot walk straight as I used to walk | falling down on my face the last time I had physio was in Nov 2018 | and discomfort |                   |        |        |        |                 |

### Diary entry: P18

| Participant: P18                                        | Entry                                                                         |                                                                                        |          |                                |                                      | Categories/Themes   |                     |                     |                     |                       |
|---------------------------------------------------------|-------------------------------------------------------------------------------|----------------------------------------------------------------------------------------|----------|--------------------------------|--------------------------------------|---------------------|---------------------|---------------------|---------------------|-----------------------|
| Prompt                                                  | Week 1                                                                        | Week 2                                                                                 | Week 3   | Week 4                         | Summary                              | Week 1              | Week 2              | Week 3              | Week 4              | Combined themes       |
| <i>Feelings about your progress this week</i>           | Very happy with progress                                                      | Happy with my progress                                                                 | No entry | Still the same                 | Good progress                        | Positive (+)        | Positive (+)        | No entry            | Positive (+)        | Positive Movement     |
| <i>Feelings about your recovery so far</i>              | I still have good and bad times. I'm getting frustrated that I cannot do more | A little frustrated when trying to out sock and shoes as I can't bend but otherwise ok | No entry | New year slow down as expected | Recovery going well and at time slow | Anxiety             | Frustrated          | No entry            | Movement            | Anxiety Pain Movement |
| <i>Level of motivation</i>                              | Good hence I 'm enjoying walking even in the rain                             | Still walking but got bump on Thursday and didn't do anything                          | No entry | Difficult                      | Motivation appears to be good        | Positive (+)        | Positive (+)        | No entry            | Anxiety             | Positive Anxiety      |
| <i>Symptoms you have experienced over the past week</i> | Ache in my back this week and tightness around stomach incision site          | Back ache sat down let leg pain                                                        | No entry | No entry                       | Pain in back and leg                 | Pain                | Pain                | No entry            | No entry            | Pain                  |
| <i>Medications you have taken this week</i>             | Paracetamol, diazepam                                                         | Paracetamol, diazepam                                                                  | No entry | Same                           | As prescribed                        | Adherence Awareness | Adherence Awareness | Adherence Awareness | Adherence Awareness | Adherence Awareness   |

| Participant: P18                                                                                                                                                           | Entry                                                                                                    |                                                                                    |          |                                         |                                        | Summary      | Categories/Themes |          |              |                                    | Combined themes |
|----------------------------------------------------------------------------------------------------------------------------------------------------------------------------|----------------------------------------------------------------------------------------------------------|------------------------------------------------------------------------------------|----------|-----------------------------------------|----------------------------------------|--------------|-------------------|----------|--------------|------------------------------------|-----------------|
|                                                                                                                                                                            | Week 1                                                                                                   | Week 2                                                                             | Week 3   | Week 4                                  | Week 1                                 |              | Week 2            | Week 3   | Week 4       |                                    |                 |
| <i>Healthcare appointments this week</i>                                                                                                                                   | None                                                                                                     | None                                                                               | No entry | Physio                                  | Limited                                | No data      | No data           | No data  | Access       | Access                             |                 |
| <i>Rehabilitation progress this week</i><br>- <i>Your ability to exercise and do activity this week</i><br><i>Return to work / activities / hobbies as relevant to you</i> | Walk twice a day need to stand up a lot this week did some drawing                                       | Walk everyday twice a day walking faster each day                                  | No entry | New exercises from physio               | Walking at a reasonable pace           | Positive (+) | Positive (+)      | No data  | Positive (+) | Anxiety<br>Positive                |                 |
| <i>Positive thought(s) this week</i>                                                                                                                                       | Improving walking well                                                                                   | Walked to park and back nice to hear birds                                         | No entry | Decided to book a cruise                | Walking better                         | Movement     | Positive (+)      | No entry | Positive(+)  | Positive (+)                       |                 |
| <i>Negative thought(s) this week</i>                                                                                                                                       | Painful to sit down hard to get to sleep                                                                 | Bing bumped into the blame by old women and jamming my back                        | No entry | No entry                                | Disturbed sleep pattern caused by pain | Pain         | Frustration       | No data  | No data      | Frustration<br>Sleep<br>Irritation |                 |
| <i>Most significant/memorable moment this week (may be positive or negative)</i>                                                                                           | Being able to move up and down stairs very well                                                          | Being able to cook properly now without a stool                                    | No entry | Hoping the prospect of cruise will help | Able to engage in activities           | Positive     | Positive (+)      | No data  | Positive     | Mood<br>Positive                   |                 |
| <i>Please describe how this week has been compared to last week</i>                                                                                                        | Improvement again good in a positive way                                                                 | Getting better when I feel good I walk more which makes me feel less bad days      | No entry | Slow must get back into a routine       | Managing pain throughout               | Improvement  | Positive (+)      | No entry | Positive (+) | Positive<br>Pain                   |                 |
| <i>Please record any other comments you may like to make regarding how you have felt or your experiences over the past week?</i>                                           | I'm struggling with socks and shoes. I have to sit up straight or feel pain in back. I've had one moment | Someone needs to design a sock put a device which works! Incision is healing well, | No entry | No entry                                | Struggling with routine activities     | Frustrated   | Frustrated        | No entry | No entry     | Frustrated                         |                 |

| Participant: P18 | Entry                                          |                       |        |        |         | Categories/Themes |        |        |        |                 |
|------------------|------------------------------------------------|-----------------------|--------|--------|---------|-------------------|--------|--------|--------|-----------------|
| Prompt           | Week 1                                         | Week 2                | Week 3 | Week 4 | Summary | Week 1            | Week 2 | Week 3 | Week 4 | Combined themes |
|                  | crying not sure why but felt much better after | using bio oil to help |        |        |         |                   |        |        |        |                 |

### Diary entry: P19

| Participant: P19                                        | Entry                  |                                   |                                                          |                                                                                                         |                                                         | Categories/Themes |              |              |                 |                                        |
|---------------------------------------------------------|------------------------|-----------------------------------|----------------------------------------------------------|---------------------------------------------------------------------------------------------------------|---------------------------------------------------------|-------------------|--------------|--------------|-----------------|----------------------------------------|
| Prompt                                                  | Week 1                 | Week 2                            | Week 3                                                   | Week 4                                                                                                  | Summary                                                 | Week 1            | Week 2       | Week 3       | Week 4          | Combined themes                        |
| <i>Feelings about your progress this week</i>           | Out of hospital 2 days | Progress slow and uncomfortable   | Doing a bit more walking round garden                    | Positive – had a day out in Broadway                                                                    | Progress slow and uncomfortable at times                | Positive (+)      | Anxiety      | Movement     | Positive (+)    | Positive<br>Movement<br>Anxiety        |
| <i>Feelings about your recovery so far</i>              | Slow each day          | Can do little bit more now        | Good – wound healing well but uncomfortable lying in bed | Good – had the dressing changed and the wound is clean and healing. Dressing came off on Thursday       | Recovery going well and at time slow                    | Anxiety           | Positive (+) | Positive (+) | Positive (+)    | Anxiety<br>Pain<br>Anxiety<br>Movement |
| <i>Level of motivation</i>                              | good                   | Good                              | Good                                                     | Good – did some Tesco shopping (v. tiring!)                                                             | Motivation appears to be good                           | Positive (+)      | Positive (+) | Positive (+) | Positive (+)    | Positive                               |
| <i>Symptoms you have experienced over the past week</i> | Soreness lump in back  | V sore stretch skin round op site | V sore back pain in legs                                 | Soreness; pain in legs from thigh to ankle in bed; back feels like stiff cardboard that doesn't want to | Generalised pain and soreness in legs and surgical site | Pain              | Pain         | Pain         | Pain discomfort | Pain<br>Discomfort                     |

| <b>Participant: P19</b>                                                                                                                                                    | <b>Entry</b>                                                      |                                                          |                                                            |                                                                                                                                                   |                                                            | <b>Categories/Themes</b> |                     |                     |                     |                                               |
|----------------------------------------------------------------------------------------------------------------------------------------------------------------------------|-------------------------------------------------------------------|----------------------------------------------------------|------------------------------------------------------------|---------------------------------------------------------------------------------------------------------------------------------------------------|------------------------------------------------------------|--------------------------|---------------------|---------------------|---------------------|-----------------------------------------------|
| <b>Prompt</b>                                                                                                                                                              | <b>Week 1</b>                                                     | <b>Week 2</b>                                            | <b>Week 3</b>                                              | <b>Week 4</b>                                                                                                                                     | <b>Summary</b>                                             | <b>Week 1</b>            | <b>Week 2</b>       | <b>Week 3</b>       | <b>Week 4</b>       | <b>Combined themes</b>                        |
|                                                                                                                                                                            |                                                                   |                                                          |                                                            | bend when getting into bed!                                                                                                                       |                                                            |                          |                     |                     |                     |                                               |
| <i>Medications you have taken this week</i>                                                                                                                                | Lactose, dehydrocodeine, paracetamol, bisoprolol, apixabin, senna | paracetamol, senna, dehydrocodeine, bisoprolol, lactose  | Senna, lactu;lose, paracetamol, dehydrocodeine bisoprolol, | Cocodamol; paracetamol, Apixaban; bisoprolol                                                                                                      | As prescribed                                              | Adherence Awareness      | Adherence Awareness | Adherence Awareness | Adherence Awareness | Adherence Awareness                           |
| <i>Healthcare appointments this week</i>                                                                                                                                   | None                                                              | None                                                     | Dressing changed by nurse on Tuesday                       | GP's nurse on Tuesday to have dressing replaced. Said it could come off after a couple of days.                                                   | Limited as required                                        | No data                  | No data             | Access              | Access              | Access                                        |
| <i>Rehabilitation progress this week</i><br>- <i>Your ability to exercise and do activity this week</i><br><i>Return to work / activities / hobbies as relevant to you</i> | v-little                                                          | Gentle walk and garden two/three times a day<br><br>none | Doing more walking                                         | Improving – did some walking round Broadway on Monday; quite a bit round Tesco on Wednesday; attended an evening meeting of Arts Centre on Monday | Walking at a reasonable pace                               | Anxiety                  | Positive (+)        | Positive (+)        | Positive (+)        | Anxiety Positive                              |
| <i>Positive thought(s) this week</i>                                                                                                                                       | Good care in hospital                                             | No data                                                  | Please it is healing well                                  | Had some nice visitors and good weather                                                                                                           |                                                            |                          |                     |                     |                     |                                               |
| <i>Negative thought(s) this week</i>                                                                                                                                       | Catheter an drain a nuisance                                      | Hate the surgeon word!!! (his not mine)                  | Pain in legs up-setting                                    | Slight depression at level of discomfort at night –                                                                                               | Slight psychological issues related to pain and discomfort | Irritation               | Frustration         | Pain                | Sleep Anxiety       | Frustration<br>Sleep<br>Anxiety<br>Irritation |



| Participant: P19                                                                                                                 | Entry                                                    |                                                                                      |                                                                                                                                          |                                                   | Summary                                | Categories/Themes |         |              |              | Combined themes         |
|----------------------------------------------------------------------------------------------------------------------------------|----------------------------------------------------------|--------------------------------------------------------------------------------------|------------------------------------------------------------------------------------------------------------------------------------------|---------------------------------------------------|----------------------------------------|-------------------|---------|--------------|--------------|-------------------------|
|                                                                                                                                  | Week 1                                                   | Week 2                                                                               | Week 3                                                                                                                                   | Week 4                                            |                                        | Week 1            | Week 2  | Week 3       | Week 4       |                         |
|                                                                                                                                  |                                                          |                                                                                      |                                                                                                                                          | interrupting sleep                                | detrimental to sleep pattern           |                   |         |              |              |                         |
| <i>Most significant/memorable moment this week (may be positive or negative)</i>                                                 | Coming home                                              | Can journey to Bromsgrove to visit friends- went well more comfortable than expected | None                                                                                                                                     | Taking off the dressing – for good                | Socialising and dressing removed       | Positive          | Mood    | No data      | Positive     | Mood<br>Positive        |
| <i>Please describe how this week has been compared to last week</i>                                                              | n/a                                                      | Probably more painful as I have to cope with normal life                             | On the whole a slight improvement                                                                                                        | Not a lot of difference – just a little less sore | Managing pain throughout               | No data           | Pain    | Positive (+) | Positive (+) | Positive<br>Pain        |
| <i>Please record any other comments you may like to make regarding how you have felt or your experiences over the past week?</i> | This was the period of the operation and home for 2 days | No data                                                                              | Seem to have developed a pain in both legs when in bed which wakes me up and keeps me awake for a while. Goes from my hips to me ankles. | Had a nice chat with you!                         | Overall related to pain and discomfort | Mood              | No data | Pain         | Support      | Mood<br>Pain<br>Support |

## Diary entry: P20

| Participant: P20                                        | Entry                                                                                                                    |                                                                                                                            |                                                                                                                                            |         |                                                    | Categories/Themes     |              |               |         |                           |
|---------------------------------------------------------|--------------------------------------------------------------------------------------------------------------------------|----------------------------------------------------------------------------------------------------------------------------|--------------------------------------------------------------------------------------------------------------------------------------------|---------|----------------------------------------------------|-----------------------|--------------|---------------|---------|---------------------------|
| Prompt                                                  | Week 1                                                                                                                   | Week 2                                                                                                                     | Week 3                                                                                                                                     | Week 4  | Summary                                            | Week 1                | Week 2       | Week 3        | Week 4  | Combined themes           |
| <i>Feelings about your progress this week</i>           | Better and quicker than expected. I had expected to be more restricted in movement                                       | Initially this week feeling were good but as I have begun to have some leg pain this has resulted in apprehension and fear | A rollercoaster of a week and a real lack of energy initially, demotivated still frightened leg pain but relief when this began to subside | No data | Steady recovery and anxious of recurring pain      | Movement              | Anxiety Pain | Energy        | No data | Energy Pain Anxiety       |
| <i>Feelings about your recovery so far</i>              | Happy with progress so far. Although when pain sets it when waiting for meds in hospital it was a bit of a rollercoaster | Started the week well, mobility increased very well but later in the week have started to have some leg pain               | No data                                                                                                                                    | No data | Steady progress over the week                      | Positive (+)          | Pain Anxiety | No data       | No data | Positive Anxiety          |
| <i>Level of motivation</i>                              | I have been keen to get up and get moving                                                                                | Still keen to try and get a balance between doing light work and walking and resting                                       | Poor initially until Thursday- no energy but this changed overnight got up caught a bus and went into town                                 | No data | Feeling energised and keen to engage in activities | Positive (+) Movement | Fluctuate    | Energy        | No data | Positive Energy Fluctuate |
| <i>Symptoms you have experienced over the past week</i> | Pain, tiredness poor memory, irritability, emotional                                                                     | Decrease in back pain better mobility increased leg pain                                                                   | Leg pain initially but began to subside after couple of days – soreness is back                                                            | No data | Sustained pain over the next couple of weeks       | Pain Fatigue          | Movement     | Pain Positive | No data | Pain Positive Movement    |
| <i>Medications you have taken this week</i>             | Paracetamol, dihydrocodeine, lactose, senna, oramorph, amitriptyline, omeprazole, vit D, Gabatenpin, naproxen            | Paracetamol, dihydrocodeine, lactulose, oramorph, amitriptyline, omeprazole, gaberpentine, naproxen,                       | Paracetamol, dihydrocodeine, lactulose, oramorph, amitriptyline, omeprazole, gaberpentine, naproxen,                                       | No data | As prescribed                                      | Adherence             | Adherence    | Adherence     | No data | Adherence                 |

| <b>Participant: P20</b>                                                                                                                                                    | <b>Entry</b>                                                                                               |                                                                                                                           |                                                                                                                     |               |                                                                         | <b>Categories/Themes</b> |                |               |               |                        |
|----------------------------------------------------------------------------------------------------------------------------------------------------------------------------|------------------------------------------------------------------------------------------------------------|---------------------------------------------------------------------------------------------------------------------------|---------------------------------------------------------------------------------------------------------------------|---------------|-------------------------------------------------------------------------|--------------------------|----------------|---------------|---------------|------------------------|
| <b>Prompt</b>                                                                                                                                                              | <b>Week 1</b>                                                                                              | <b>Week 2</b>                                                                                                             | <b>Week 3</b>                                                                                                       | <b>Week 4</b> | <b>Summary</b>                                                          | <b>Week 1</b>            | <b>Week 2</b>  | <b>Week 3</b> | <b>Week 4</b> | <b>Combined themes</b> |
| <i>Healthcare appointments this week</i>                                                                                                                                   | None                                                                                                       | None                                                                                                                      | Nurse appointment at GP surgery to remove dressing and check wound – Monday.                                        | No data       | Limited health care access                                              | No data                  | No data        | Access        | No data       | Access                 |
| <i>Rehabilitation progress this week</i><br>- <i>Your ability to exercise and do activity this week</i><br><i>Return to work / activities / hobbies as relevant to you</i> | Moving around better than expected- ability to turn over in bed by the end of this week.                   | Able to walk much further this week and feeling more agile generally day out in western-super-mare.                       | Real lack of energy initially but when this increased caught bus walked around supermarket                          | No data       | Steady recovery, better movement                                        | Movement                 | Movement Speed | Energy        | No data       | Energy Movement Speed  |
| <i>Positive thought(s) this week</i>                                                                                                                                       | I am happy with my progress – no leg pain                                                                  | Initially in the week feeling positive, happy relieved                                                                    | Relief that leg pain subsided                                                                                       | No data       | Recovery going well                                                     | Positive (+)             | Positive (+)   | Mood          | No data       | Positive Mood          |
| <i>Negative thought(s) this week</i>                                                                                                                                       | Upset when I was waiting for medication in hospital and not feeling like I could stand the pain any longer | Later in the week feeling of concern and being frightened that leg pain is returning                                      | Low mood and not being able to get motivated due to lack of energy                                                  | No data       | Feeling upset and deflated because of the thought of leg pain returning | Anxiety                  | Anxiety Mood   | Mood          | No data       | Anxiety Mood           |
| <i>Most significant/memorable moment this week (may be positive or negative)</i>                                                                                           | Being home makes so much difference no leg pain!!!                                                         | Leg pain occurring                                                                                                        | Leg pain went away                                                                                                  | No data       | Managing pain                                                           | Pain                     | Pain           | Pain          | No data       | Pain                   |
| <i>Please describe how this week has been compared to last week</i>                                                                                                        | N/A                                                                                                        | Although I was less mobile and agile last week I feel more positive about last week as this week has been overshadowed by | A week of 2 halves – however because the leg pain has gone away I feel more positive and hopeful of a good recovery | No data       | Pain impacting recovery                                                 | No data                  | Movement Pain  | Positive (+)  | No data       | Movement Pain          |

| <b>Participant: P20</b>                                                                                                          | <b>Entry</b>                                                                                                                       |                                                                                                                                                                                                                                                          |                                                        |               |                                                                             | <b>Categories/Themes</b> |                  |               |               |                           |
|----------------------------------------------------------------------------------------------------------------------------------|------------------------------------------------------------------------------------------------------------------------------------|----------------------------------------------------------------------------------------------------------------------------------------------------------------------------------------------------------------------------------------------------------|--------------------------------------------------------|---------------|-----------------------------------------------------------------------------|--------------------------|------------------|---------------|---------------|---------------------------|
| <b>Prompt</b>                                                                                                                    | <b>Week 1</b>                                                                                                                      | <b>Week 2</b>                                                                                                                                                                                                                                            | <b>Week 3</b>                                          | <b>Week 4</b> | <b>Summary</b>                                                              | <b>Week 1</b>            | <b>Week 2</b>    | <b>Week 3</b> | <b>Week 4</b> | <b>Combined themes</b>    |
|                                                                                                                                  |                                                                                                                                    | returning of some leg pain                                                                                                                                                                                                                               |                                                        |               |                                                                             |                          |                  |               |               |                           |
| <i>Please record any other comments you may like to make regarding how you have felt or your experiences over the past week?</i> | I have ended the week feeling positive however the week has been a rollercoaster of emotion pain and varying degrees of positivity | Returning leg pain has caused a dilemma... is this the norm for this operation? Will it go away? Is it going to get worse? Should I contact anyone for advice? Who should I contact? Will I look a fool if I do? I'm frightened and not sure what to do! | Can't wait to be able to drive and get out a bit more! | No data       | Overall progressive recovery but frustrated with the lack of follow-up care | Positive (+)             | Pain Frustration | Positive (+)  | No data       | Pain Positive Frustration |

### Diary entry: P21

| <b>Participant: P21</b>                       | <b>Entry</b>                                                       |                                                            |                                                              |               |                                          | <b>Categories/Themes</b> |               |               |               |                        |
|-----------------------------------------------|--------------------------------------------------------------------|------------------------------------------------------------|--------------------------------------------------------------|---------------|------------------------------------------|--------------------------|---------------|---------------|---------------|------------------------|
| <b>Prompt</b>                                 | <b>Week 1</b>                                                      | <b>Week 2</b>                                              | <b>Week 3</b>                                                | <b>Week 4</b> | <b>Summary</b>                           | <b>Week 1</b>            | <b>Week 2</b> | <b>Week 3</b> | <b>Week 4</b> | <b>Combined themes</b> |
| <i>Feelings about your progress this week</i> | Feeling good at moving around. Very worried about my wound leaking | Mobility not an issue                                      | Wound now closed so v pleased                                | No data       | Positive about recovery                  | Positive (+)             | Movement      | Positive (+)  | No data       | Positive Movement      |
| <i>Feelings about your recovery so far</i>    | I'm worried and unsure of wound healing                            | Still in hospital and now IV antibiotics                   | Still in limbo v. upset as no news not been referred to BIU! | No data       | Frustration about recovery and referral  | Anxiety                  | Frustration   | Frustration   | No data       | Anxiety Frustration    |
| <i>Level of motivation</i>                    | Good                                                               | Very low. Awaiting return to surgery tomorrow for wash out | Bad                                                          | No data       | Wound affecting psychological well-being | Positive (+)             | Frustration   | Frustration   | No data       | Positive Frustration   |

| <b>Participant: P21</b>                                                                                                                                                    | <b>Entry</b>                                                       |                                                       |                                     |               |                                            | <b>Categories/Themes</b> |               |               |               |                        |
|----------------------------------------------------------------------------------------------------------------------------------------------------------------------------|--------------------------------------------------------------------|-------------------------------------------------------|-------------------------------------|---------------|--------------------------------------------|--------------------------|---------------|---------------|---------------|------------------------|
| <b>Prompt</b>                                                                                                                                                              | <b>Week 1</b>                                                      | <b>Week 2</b>                                         | <b>Week 3</b>                       | <b>Week 4</b> | <b>Summary</b>                             | <b>Week 1</b>            | <b>Week 2</b> | <b>Week 3</b> | <b>Week 4</b> | <b>Combined themes</b> |
| <i>Symptoms you have experienced over the past week</i>                                                                                                                    | Spine is v. painful wound leaking continually                      | Wound v sore with vacuum on it                        | pain                                | No data       | Painful wound                              | Pain                     | Pain          | Pain          | No data       | Pain                   |
| <i>Medications you have taken this week</i>                                                                                                                                | Oxynorm, dihydrocodeine, paracetamol, antibiotics                  | IV antibiotics, oxynorm, dihydrocodeine, paracetamol  | Oxynorm, dihydrocodeine paracetamol | No data       | As prescribed                              | Adherence                | Adherence     | Adherence     | No data       | Adherence              |
| <i>Healthcare appointments this week</i>                                                                                                                                   | In hospital                                                        | Return to surgery 14/5 for wash out and sealing wound | In hospital                         | No data       | In hospital stay                           | Access                   | Access        | Access        | No data       | Access                 |
| <i>Rehabilitation progress this week</i><br>- <i>Your ability to exercise and do activity this week</i><br><i>Return to work / activities / hobbies as relevant to you</i> | Wondering about room as isolated                                   | No data                                               | No data                             | No data       | Anxious about infection and being isolated | Anxiety                  | No data       | No data       | No data       | Anxiety                |
| <i>Positive thought(s) this week</i>                                                                                                                                       | Glad I'm in hospital so infection can be treated                   | Hope this is over soon                                | No data                             | No data       | Relieved and positive                      | Mood                     | Positive (+)  | No data       | No data       | Mood Positive          |
| <i>Negative thought(s) this week</i>                                                                                                                                       | Anxious and worried about how long I'll be in hospital (5-6 weeks) | How much longer                                       | When this will end                  | No data       | Worried about length of hospital stay      | Anxiety                  | Anxiety       | Depression    | No data       | Anxiety Mood           |
| <i>Most significant/memorable moment this week (may be positive or negative)</i>                                                                                           | Returning to surgery for wash out and vacuum fitted                | No data                                               | No data                             | No data       | Access to health care                      | Access                   | No data       | No data       | No data       | Access                 |
| <i>Please describe how this week has been compared to last week</i>                                                                                                        | Very bad lots of worry about the level of infection                | No data                                               | v. bad , v. emotional               | No data       | Emotionally draining, worried about        | Anxiety                  | No data       | Frustration   | No data       | Anxiety Frustration    |

| <b>Participant: P21</b>                                                                                                          | <b>Entry</b>               |               |                                                                                   |               |                        | <b>Categories/Themes</b> |               |               |               |                        |
|----------------------------------------------------------------------------------------------------------------------------------|----------------------------|---------------|-----------------------------------------------------------------------------------|---------------|------------------------|--------------------------|---------------|---------------|---------------|------------------------|
| <b>Prompt</b>                                                                                                                    | <b>Week 1</b>              | <b>Week 2</b> | <b>Week 3</b>                                                                     | <b>Week 4</b> | <b>Summary</b>         | <b>Week 1</b>            | <b>Week 2</b> | <b>Week 3</b> | <b>Week 4</b> | <b>Combined themes</b> |
|                                                                                                                                  | and how it could affect me |               |                                                                                   |               | wound getting infected |                          |               |               |               |                        |
| <i>Please record any other comments you may like to make regarding how you have felt or your experiences over the past week?</i> | No data                    | No data       | So upset with lack of communication no referral made to BIU so another week delay | No data       | No clear care pathway  | No data                  | No data       | Frustration   | No data       | Frustration            |

### Diary entry: P22

| <b>Participant: P22</b>                                 | <b>Entry</b>                                                         |                                                         |                                                         |               |                                                 | <b>Categories/Themes</b> |                     |                     |               |                        |
|---------------------------------------------------------|----------------------------------------------------------------------|---------------------------------------------------------|---------------------------------------------------------|---------------|-------------------------------------------------|--------------------------|---------------------|---------------------|---------------|------------------------|
| <b>Prompt</b>                                           | <b>Week 1</b>                                                        | <b>Week 2</b>                                           | <b>Week 3</b>                                           | <b>Week 4</b> | <b>Summary</b>                                  | <b>Week 1</b>            | <b>Week 2</b>       | <b>Week 3</b>       | <b>Week 4</b> | <b>Combined themes</b> |
| <i>Feelings about your progress this week</i>           | Early days yet, still experiencing pain from initial surgery.        | Positive, making progress in moving around at home.     | Positive, now moving around at home without crutches.   | No data       | Making positive progress and mobility improving | Pain                     | Movement            | Movement            | No data       | Pain<br>Movement       |
| <i>Feelings about your recovery so far</i>              | Short term pain, long term gain!!                                    | Positive.                                               | Very positive                                           | No data       | Feeling positive                                | Positive (+)             | Positive (+)        | Positive (+)        | No data       | Positive               |
| <i>Level of motivation</i>                              | Good, with the exception of Sunday when suffering a migraine attack. | Good, was able to leave hospital on Monday 5th          | Remains good on a day to day basis                      | No data       | Reasonable level of motivation                  | Positive (+)             | Positive (+)        | Positive (+)        | No data       | Positive               |
| <i>Symptoms you have experienced over the past week</i> | Pain at wound site. Left sided back pain (into buttock)              | Pain at wound site. Left sided back pain (into buttock) | Pain at wound site. Left sided back pain (into buttock) | No data       | Consistent pain around wound site               | Pain                     | Pain                | Pain                | No data       | Pain                   |
| <i>Medications you have taken this week</i>             | Morphine (weaned off mid-week)<br>Oxycodone Hydrochloride            | Oxycodone Hydrochloride<br>Tramadol<br>Paracetamol      | Oxycodone Hydrochloride<br>Tramadol<br>Paracetamol      | No data       | As prescribed and managing as appropriate       | Adherence Awareness      | Adherence Awareness | Adherence Awareness | No data       | Adherence Awareness    |

| <b>Participant: P22</b>                                                                                                                                                    | <b>Entry</b>                                                                                                             |                                                                                                                                                   |                                                                                                                                                                                                              |               |                                 | <b>Categories/Themes</b> |                |                |               |                        |
|----------------------------------------------------------------------------------------------------------------------------------------------------------------------------|--------------------------------------------------------------------------------------------------------------------------|---------------------------------------------------------------------------------------------------------------------------------------------------|--------------------------------------------------------------------------------------------------------------------------------------------------------------------------------------------------------------|---------------|---------------------------------|--------------------------|----------------|----------------|---------------|------------------------|
| <b>Prompt</b>                                                                                                                                                              | <b>Week 1</b>                                                                                                            | <b>Week 2</b>                                                                                                                                     | <b>Week 3</b>                                                                                                                                                                                                | <b>Week 4</b> | <b>Summary</b>                  | <b>Week 1</b>            | <b>Week 2</b>  | <b>Week 3</b>  | <b>Week 4</b> | <b>Combined themes</b> |
|                                                                                                                                                                            | Tramadol<br>Paracetamol<br>Meloxicam<br>Lansoprazole<br>Candesarten<br>Fluoxetine<br>Sumatriptan                         | Meloxicam<br>Lansoprazole<br>Candesarten<br>Fluoxetine<br>Sumatriptan                                                                             | Meloxicam<br>Lansoprazole<br>Candesarten<br>Fluoxetine<br>Sumatriptan                                                                                                                                        |               |                                 |                          |                |                |               |                        |
| <i>Healthcare appointments this week</i>                                                                                                                                   | Physiotherapist in hospital                                                                                              | Physiotherapist in hospital                                                                                                                       | Physiotherapist – xxx<br>General Hospital<br>Nurse - xxx Clinic (wound check)                                                                                                                                | No data       | Adequate access to health care  | Access                   | Access         | Access         | No data       | Access                 |
| <i>Rehabilitation progress this week</i><br>- <i>Your ability to exercise and do activity this week</i><br><i>Return to work / activities / hobbies as relevant to you</i> | Mobilised from bed to bathroom on ward, using frame & toilet riser.<br>Able to shower independently in bathroom on ward. | Mobilised to be able to slowly walk length of the ward.<br>Discharged from hospital to home address, moving around with crutches within the home. | Able to walk around at home without the aid of crutches<br>2 trips out in car with partner – on both occasions, had meal out (unable to sit for entire duration of these, necessary to get up & move around) | No data       | Reasonably mobile               | Movement                 | Movement Speed | Movement Speed | No data       | Movement Speed         |
| <i>Positive thought(s) this week</i>                                                                                                                                       | I WILL be out of hospital by Wednesday 7 <sup>th</sup> !                                                                 | Made it home 2 days before I originally expected                                                                                                  | Progress has been good, planning other short trips out. Looking forward to building up to unaccompanied walks for a short distance.                                                                          | No data       | Home comfort and planning trips | Positive (+)             | Speed          | Positive (+)   | No data       | Positive Speed         |

| <b>Participant: P22</b>                                                                          | <b>Entry</b>                                                                                                                                   |                                                                                                                                  |                                                                                                                                                                                                                                                                  |               |                                                                       | <b>Categories/Themes</b> |               |                       |               |                            |
|--------------------------------------------------------------------------------------------------|------------------------------------------------------------------------------------------------------------------------------------------------|----------------------------------------------------------------------------------------------------------------------------------|------------------------------------------------------------------------------------------------------------------------------------------------------------------------------------------------------------------------------------------------------------------|---------------|-----------------------------------------------------------------------|--------------------------|---------------|-----------------------|---------------|----------------------------|
| <b>Prompt</b>                                                                                    | <b>Week 1</b>                                                                                                                                  | <b>Week 2</b>                                                                                                                    | <b>Week 3</b>                                                                                                                                                                                                                                                    | <b>Week 4</b> | <b>Summary</b>                                                        | <b>Week 1</b>            | <b>Week 2</b> | <b>Week 3</b>         | <b>Week 4</b> | <b>Combined themes</b>     |
| <i>Negative thought(s) this week</i>                                                             | Lack of sleep/ level of noise on ward. Nothing negative regarding procedure or progress/ rehab.                                                | Lack of sleep/ disturbed due to pain when turning over in bed at night. Nothing negative regarding procedure or progress/ rehab. | Still lack of sleep/ disturbed due to wound pain when turning over in bed at night, although this has reduced from previous week.                                                                                                                                | No data       | Disturbed sleep pattern                                               | Sleep                    | Sleep         | Sleep                 | No data       | Sleep                      |
| <i>Most significant/memorable moment this week (may be positive or negative)</i>                 | Showering independently (Sat 3 <sup>rd</sup> )                                                                                                 | Walked downstairs without crutches.                                                                                              |                                                                                                                                                                                                                                                                  | No data       | Independent                                                           | Movement                 | Movement      | Movement Positive (+) | No data       | Movement                   |
| <i>Please describe how this week has been compared to last week</i>                              | First week post surgery, no real comparison. Feeling very positive as no longer feeling leg pain post op which was significant problem pre-op. | Difference in mood being at home rather than in hospital – feeling much more positive being back in home environment.            | Pain & stiffness in back has significantly reduced since last week, much easier to move around especially from sitting to standing. Use of crutches outside the home has primarily been to aid balance rather than needing to lean on for support as previously. | No data       | Adequate recovery following surgery                                   | Positive (+)             | Mood          | Pain                  | No data       | Pain<br>Mood<br>Positive   |
| <i>Please record any other comments you may like to make regarding how you have felt or your</i> | Mood took a significant dip on Sunday a.m. with suffering migraine attack & mobilizing very                                                    | I feel that it has been important now at home, to make sure that I keep some                                                     | Still maintaining structure to my day & ensured I have got up & dressed. Bath                                                                                                                                                                                    | No data       | Adapting following surgery, activities of daily living affected as is | Mood                     | Positive (+)  | Mood<br>Energy        | No data       | Positive<br>Energy<br>Mood |



| <b>Participant: P22</b>                | <b>Entry</b>                                                                                                                                                                                                                                                                                                                             |                                                                                                                                                                                                                                                                                                                                                                                                                                                                                     |                                                                                                                                                                                                                                                                                                                                                                    |               |                         | <b>Categories/Themes</b> |               |               |               |                        |
|----------------------------------------|------------------------------------------------------------------------------------------------------------------------------------------------------------------------------------------------------------------------------------------------------------------------------------------------------------------------------------------|-------------------------------------------------------------------------------------------------------------------------------------------------------------------------------------------------------------------------------------------------------------------------------------------------------------------------------------------------------------------------------------------------------------------------------------------------------------------------------------|--------------------------------------------------------------------------------------------------------------------------------------------------------------------------------------------------------------------------------------------------------------------------------------------------------------------------------------------------------------------|---------------|-------------------------|--------------------------|---------------|---------------|---------------|------------------------|
| <b>Prompt</b>                          | <b>Week 1</b>                                                                                                                                                                                                                                                                                                                            | <b>Week 2</b>                                                                                                                                                                                                                                                                                                                                                                                                                                                                       | <b>Week 3</b>                                                                                                                                                                                                                                                                                                                                                      | <b>Week 4</b> | <b>Summary</b>          | <b>Week 1</b>            | <b>Week 2</b> | <b>Week 3</b> | <b>Week 4</b> | <b>Combined themes</b> |
| <i>experiences over the past week?</i> | little during the day. However, physio attended Sunday also, since I was determined to get moving. Tried crutches & able to walk the length of the ward. Also stair assessment to evaluate mobility pre discharge. Experienced additional pain & stiffness overnight, either due to lack of movement in a.m. or additional movement p.m. | structure to my day. There have been varying times when I have woken/got out of bed, but have ensured that I freshened up & got dressed rather than sit in pyjamas all day. (Unable to shower as still waiting for bath board to be delivered by equipment services. I also feel it's important to vary where I sit/ lie/ move - I have 3 main positions – upright in easy chair/ slightly reclined in easy chair/ horizontal on sofa & make sure I get up & move around regularly. | board arrived from equipment services which made quite a difference - such a mood boost to be able to get showered properly. Main achievement of the week was being able to prepare a light meal with no assistance. It might have taken nearly 3 hrs. to prep & cook but the sense of satisfaction afterwards was brilliant, despite being very tired afterwards. |               | psychological wellbeing |                          |               |               |               |                        |

Non-consecutive week – (26/08/18 – 23/09/18) – 2 weeks difference between wk1 and wk2

Diary entry: P23

| Participant: P23                                        | Entry                                                  |                                      |                                                                                                                                               |                                                                                                                       |                                                        | Summary          | Categories/Themes |              |              |                                       | Combined themes |
|---------------------------------------------------------|--------------------------------------------------------|--------------------------------------|-----------------------------------------------------------------------------------------------------------------------------------------------|-----------------------------------------------------------------------------------------------------------------------|--------------------------------------------------------|------------------|-------------------|--------------|--------------|---------------------------------------|-----------------|
|                                                         | Week 1                                                 | Week 2                               | Week 3                                                                                                                                        | Week 4                                                                                                                | Week 1                                                 |                  | Week 2            | Week 3       | Week 4       |                                       |                 |
| <i>Feelings about your progress this week</i>           | If progress is pain relief then its good               | Slow                                 | No progress and back to frustration                                                                                                           | More positive after physio appointment                                                                                | Steady progress                                        | Pain<br>Anxiety  | Energy            | Anxiety      | Positive (+) | Anxiety<br>Pain<br>Energy<br>Positive |                 |
| <i>Feelings about your recovery so far</i>              | Pain has eased and mobility has improved               | positive                             | Delay in recovery                                                                                                                             | Better                                                                                                                | Steady recovery                                        | Movement<br>Pain | Positive (+)      | Anxiety      | Positive (+) | Positive<br>Pain                      |                 |
| <i>Level of motivation</i>                              | high                                                   | High but tested                      | High but tested                                                                                                                               | High but tested                                                                                                       | High level of motivation                               | Positive (+)     | Positive (+)      | Positive (+) | Positive (+) | Positive                              |                 |
| <i>Symptoms you have experienced over the past week</i> | Continued lower back pain but greatly reduced leg pain | Bleeding from area of incision       | Realistic pain levels due to personal decision to reduce medication with extra pain being introduced since new exercises have been introduced | Continued realistic pain levels due to personal decision to reduce medication but mainly in the area of the procedure | Managing pain by controlling and reducing pain killers | Pain             | Anxiety           | Pain         | Pain         | Pain<br>Anxiety                       |                 |
| <i>Medications you have taken this week</i>             | Co-codamol, Ibuprofen, gabapentin and bisacodyl        | Co-Codamol, Ibuprofen and Gabapentin | Co-codamol                                                                                                                                    | Co-codamol                                                                                                            | As prescribed                                          | Adherence        | Adherence         | Adherence    | Adherence    | Adherence                             |                 |

| Participant: P23                                                                                                                                                           | Entry                                                                         |                                                                           |                                                                               |                                                                   |                                                  | Summary      | Categories/Themes    |              |              |                         | Combined themes |
|----------------------------------------------------------------------------------------------------------------------------------------------------------------------------|-------------------------------------------------------------------------------|---------------------------------------------------------------------------|-------------------------------------------------------------------------------|-------------------------------------------------------------------|--------------------------------------------------|--------------|----------------------|--------------|--------------|-------------------------|-----------------|
|                                                                                                                                                                            | Prompt                                                                        | Week 1                                                                    | Week 2                                                                        | Week 3                                                            | Week 4                                           |              | Week 1               | Week 2       | Week 3       | Week 4                  |                 |
| <i>Healthcare appointments this week</i>                                                                                                                                   | GP for pain relief                                                            | A&E for attention to bleeding<br>G P for trimming of stitches             | None                                                                          | Physio                                                            | Adequate access to health care                   | Access       | Access               | No data      | Access       | Access                  |                 |
| <i>Rehabilitation progress this week</i><br>- <i>Your ability to exercise and do activity this week</i><br><i>Return to work / activities / hobbies as relevant to you</i> | Am able to carry out all advised exercise but a feeling i could be doing more | Exercise as advised in booklet from hospital                              | None                                                                          | slight                                                            | Following advice and adhering to exercise regime | Speed        | Movement             | No data      | Positive (+) | Positive Speed Movement |                 |
| <i>Positive thought(s) this week</i>                                                                                                                                       | Its getting better                                                            | The future                                                                | None                                                                          | More hopeful                                                      | Hopeful for the future                           | Positive (+) | Positive (+)         | No data      | Positive (+) | Positive                |                 |
| <i>Negative thought(s) this week</i>                                                                                                                                       | frustration                                                                   | Frustration                                                               | Lack of support                                                               | Lack of support                                                   | General lack of support                          | Frustration  | Frustration          | Support (-)  | Support (-)  | Frustration Support     |                 |
| <i>Most significant/memorable moment this week (may be positive or negative)</i>                                                                                           | Had my longest walk                                                           | Bleeding from incision left me feeling more frustrated over slow progress | Having to stop home exercise and walking because of extra pain it has induced | Having to stop home exercise because of extra pain it has induced | Setting goals and achieving milestones           | Speed        | Frustrated           | Pain Anxiety | Pain Anxiety | Speed Pain Anxiety      |                 |
| <i>Please describe how this week has been compared to last week</i>                                                                                                        | Much better                                                                   | A little more mobility otherwise about the same                           | Total reverse as everything has gone backwards                                | Minimal change                                                    | Good progress and mobility improving             | Positive (+) | Movement Frustration | Speed        | Positive (+) | Positive Speed          |                 |

| <b>Participant: P23</b>                                                                                                          | <b>Entry</b>                                                                                                                                                                                                                                                                                                                                                                                                                                                                                                                                       |               |                                                                                                                                                                                                                                  |                                                                                                                                   |                                 | <b>Categories/Themes</b> |               |               |               |                        |
|----------------------------------------------------------------------------------------------------------------------------------|----------------------------------------------------------------------------------------------------------------------------------------------------------------------------------------------------------------------------------------------------------------------------------------------------------------------------------------------------------------------------------------------------------------------------------------------------------------------------------------------------------------------------------------------------|---------------|----------------------------------------------------------------------------------------------------------------------------------------------------------------------------------------------------------------------------------|-----------------------------------------------------------------------------------------------------------------------------------|---------------------------------|--------------------------|---------------|---------------|---------------|------------------------|
| <b>Prompt</b>                                                                                                                    | <b>Week 1</b>                                                                                                                                                                                                                                                                                                                                                                                                                                                                                                                                      | <b>Week 2</b> | <b>Week 3</b>                                                                                                                                                                                                                    | <b>Week 4</b>                                                                                                                     | <b>Summary</b>                  | <b>Week 1</b>            | <b>Week 2</b> | <b>Week 3</b> | <b>Week 4</b> | <b>Combined themes</b> |
|                                                                                                                                  |                                                                                                                                                                                                                                                                                                                                                                                                                                                                                                                                                    |               |                                                                                                                                                                                                                                  |                                                                                                                                   |                                 |                          |               |               |               |                        |
| <i>Please record any other comments you may like to make regarding how you have felt or your experiences over the past week?</i> | Continued gradual progress mixed with frustration over how to progress when i have been told not to sit for long periods stand for long periods lift, bend, twist, pull, push or drive. What am I supposed to do for 16 hours a day to assist improvement (lack of post op advice)<br>No diary was recorded after hospital discharge last Friday evening, as lack of medication left me with severe pain and extreme constipation until after GP visit on Monday Please advise if more detailed responses are required on answers to diary prompts | No data       | As in the past the lack of a specific person to contact means that with a physio/exercise problem I must wait 2 weeks for a resolution and as such this relates to 2 weeks lost recovery and an increase in personal frustration | As in the past the lack of a specific person of contact means that with a physio/exercise problem I must wait weeks for a resolve | Lack of structured care pathway | Anxiety<br>Frustration   | No data       | Frustration   | Frustration   | Anxiety<br>Frustration |

Non-consecutive week – (12/09/18 – 30/12/18) – 2 weeks difference between wk1 and wk2

Diary entry: P24

| Participant: P24                                        | Entry                                                                                                                                                                                                                                                |                                               |                                                                                                                      |                                                                     |                                                         | Categories/Themes |              |               |              |                     |
|---------------------------------------------------------|------------------------------------------------------------------------------------------------------------------------------------------------------------------------------------------------------------------------------------------------------|-----------------------------------------------|----------------------------------------------------------------------------------------------------------------------|---------------------------------------------------------------------|---------------------------------------------------------|-------------------|--------------|---------------|--------------|---------------------|
| Prompt                                                  | Week 1                                                                                                                                                                                                                                               | Week 2                                        | Week 3                                                                                                               | Week 4                                                              | Summary                                                 | Week 1            | Week 2       | Week 3        | Week 4       | Combined themes     |
| <i>Feelings about your progress this week</i>           | Good progress. Have struggled more with the after effects of surgery and taking Medication than the surgery. Had the best result I could have had, the surgery has left me leg pain free and has corrected some posture/stature problems as a bonus. | Very positive, every day is a better day.     | Good progress, some days I push more to walk further other days I rest quite a bit so hopefully I don't do too much. | Good progress again with everything getting easier.                 | Steady progress and hopeful recovery will be successful | Positive (+)      | Positive (+) | Energy        | Positive (+) | Positive Energy     |
| <i>Feelings about your recovery so far</i>              | Very, very good.                                                                                                                                                                                                                                     | Excellent, no problems.                       | All positive.                                                                                                        | Brilliant recovery, particularly considering it is 4 weeks post op. | Positive attitude to recovery                           | Positive (+)      | Energy       | Positive (+)  | Positive (+) | Positive Energy     |
| <i>Level of motivation</i>                              | High. Being leg pain free gives you a huge amount of motivation to now make the best of each day and hence your recovery.                                                                                                                            | Very high.                                    | Still high due to being pain free.                                                                                   | Still really good.                                                  | Energy                                                  | Positive (+)      | Positive (+) | Positive (+)  | Positive (+) | Positive            |
| <i>Symptoms you have experienced over the past week</i> | Sore wound, painful to lie on.                                                                                                                                                                                                                       | Aching in my back which very slight, not even | Wound is getting better, still gets a little                                                                         | Slight back ache. Numbness in                                       | Pain and discomfort associated                          | Pain              | Pain         | Pain Positive | Speed        | Pain Positive Speed |

| <b>Participant: P24</b>                                                                                                                                                    | <b>Entry</b>                                                                                                    |                                                                                                                                                                                                                                                                                                                                                                |                                                                                                     |                                                                                                                                                                  |                                          | <b>Categories/Themes</b> |               |               |                  |                        |
|----------------------------------------------------------------------------------------------------------------------------------------------------------------------------|-----------------------------------------------------------------------------------------------------------------|----------------------------------------------------------------------------------------------------------------------------------------------------------------------------------------------------------------------------------------------------------------------------------------------------------------------------------------------------------------|-----------------------------------------------------------------------------------------------------|------------------------------------------------------------------------------------------------------------------------------------------------------------------|------------------------------------------|--------------------------|---------------|---------------|------------------|------------------------|
| <b>Prompt</b>                                                                                                                                                              | <b>Week 1</b>                                                                                                   | <b>Week 2</b>                                                                                                                                                                                                                                                                                                                                                  | <b>Week 3</b>                                                                                       | <b>Week 4</b>                                                                                                                                                    | <b>Summary</b>                           | <b>Week 1</b>            | <b>Week 2</b> | <b>Week 3</b> | <b>Week 4</b>    | <b>Combined themes</b> |
|                                                                                                                                                                            | Headaches - gradually getting less.<br>Constipation.<br>Minor pain around the bone areas that have had surgery. | requiring pain killers. Slight numbness remains in lower RH leg, nothing to complain about                                                                                                                                                                                                                                                                     | swollen but responds well to icing. Have some aching in my back but I do feel it is to be expected. | lower leg. Feeling of back being uncomfortable which I can't say is pain, I just may be doing a little too much.                                                 | with surgery and medication              |                          |               |               |                  |                        |
| <i>Medications you have taken this week</i>                                                                                                                                | Paracetamol<br>Lactulose<br>Senna                                                                               | Nil                                                                                                                                                                                                                                                                                                                                                            | Occasional paracetamol and Naproxen.                                                                | Paracetamol<br>Naproxen                                                                                                                                          | As prescribed                            | Awareness                | No data       | Awareness     | Awareness        | Awareness              |
| <i>Healthcare appointments this week</i>                                                                                                                                   | None                                                                                                            | Nurse to check wound and change dressing. All good.                                                                                                                                                                                                                                                                                                            | None                                                                                                | None                                                                                                                                                             | Some health care intervention            | Access                   | No data       | No data       | No data          | Limited access         |
| <i>Rehabilitation progress this week</i><br>- <i>Your ability to exercise and do activity this week</i><br><i>Return to work / activities / hobbies as relevant to you</i> | Short walks - total around 3000 steps a day                                                                     | Really good, have been increasing walking distance week each day with no effect on leg pain which is still zero. Longest walk about 2 miles. Total you this week for that day close to 4 miles. I love cooking and am now back in the kitchen and enjoying it. Couldn't stand and cook even a simple meal pre op. Going to the shops and being able to browse. | Walking further when I feel up to it. Keep having rest days.                                        | Walking further, one day it was 5 miles over the course of the day. I get tired but think that's because it's a long time since I could walk anything like that. | Willingness to improve and help recovery | Speed                    | Speed         | Speed         | Speed<br>Fatigue | Speed<br>Fatigue       |

| <b>Participant: P24</b>                                                          | <b>Entry</b>                                                                                                                                                       |                                                                                     |                                                                                                                     |                                                                                                          |                                                       | <b>Categories/Themes</b> |               |                      |               |                             |
|----------------------------------------------------------------------------------|--------------------------------------------------------------------------------------------------------------------------------------------------------------------|-------------------------------------------------------------------------------------|---------------------------------------------------------------------------------------------------------------------|----------------------------------------------------------------------------------------------------------|-------------------------------------------------------|--------------------------|---------------|----------------------|---------------|-----------------------------|
| <b>Prompt</b>                                                                    | <b>Week 1</b>                                                                                                                                                      | <b>Week 2</b>                                                                       | <b>Week 3</b>                                                                                                       | <b>Week 4</b>                                                                                            | <b>Summary</b>                                        | <b>Week 1</b>            | <b>Week 2</b> | <b>Week 3</b>        | <b>Week 4</b> | <b>Combined themes</b>      |
| <i>Positive thought(s) this week</i>                                             | I am blessed to have such a good result and living without leg pain is the best thing ever. Other pain is incidental and easy to live with compared.               | Life is great without pain! :-)                                                     | Life without leg pain is great!                                                                                     | Everything is going swimmingly well!                                                                     | Managing pain and generally feeling good              | Mood                     | Mood          | Energy               | Energy        | Mood<br>Energy              |
| <i>Negative thought(s) this week</i>                                             | Nothing really negative, you can't get over having no leg pain. Constipation was the worst thing.                                                                  | None                                                                                | Numbness in leg has increased a little which has disappointed me a little. Not enough to get upset about it though! | None.                                                                                                    | Staying positive                                      | Positive (+)             | No data       | Pain<br>Positive (+) | No data       | Positive<br>Pain            |
| <i>Most significant/memorable moment this week (may be positive or negative)</i> | Realising that the leg pain has gone - Mission Accomplished                                                                                                        | Walking without pain, being able to stand up straight. Getting back in the kitchen! | Have reached nearly 4 miles walking a day pain free. Maximum before was 1.75 miles all in increasing pain.          | Walking with friends and family with a smile on my face. It's been over ten years since I could do that! | Setting milestones and satisfaction in achieving them | Positive (+)<br>Mood     | Movement      | Speed                | Energy        | Energy<br>Speed<br>Movement |
| <i>Please describe how this week has been compared to last week</i>              | This week is heaven, last week was hell. Last week everything was a struggle, this week anything is achievable, within the constraints of recovering from surgery! | Last week was good, this week even better                                           | A better week, wound is getting easier so must be getting better.                                                   | Even better, doing what I like when I want to without strategic planning makes you feel good about life. | Remarkable progress                                   | Positive (++)            | Energy        | Positive (+)         | Mood          | Energy<br>Mood<br>Positive  |
| <i>Please record any other comments you</i>                                      | Being in hospital is one of the                                                                                                                                    | Everything is a pleasure again -                                                    | Enjoying pushing myself                                                                                             | All positive looking                                                                                     | Pleasant recovery                                     | Positive (+)             | Positive (+)  | Positive (+)         | Positive (+)  | Positive                    |

| Participant: P24                                                                            | Entry                                                                                                                                                                                     |                                                                                                                                |                                                    |                                                        |         | Categories/Themes |        |        |        |                 |
|---------------------------------------------------------------------------------------------|-------------------------------------------------------------------------------------------------------------------------------------------------------------------------------------------|--------------------------------------------------------------------------------------------------------------------------------|----------------------------------------------------|--------------------------------------------------------|---------|-------------------|--------|--------|--------|-----------------|
| Prompt                                                                                      | Week 1                                                                                                                                                                                    | Week 2                                                                                                                         | Week 3                                             | Week 4                                                 | Summary | Week 1            | Week 2 | Week 3 | Week 4 | Combined themes |
| <i>may like to make regarding how you have felt or your experiences over the past week?</i> | worst experience I have ever had, I feel for the poor people in there who are poorly. Once discharged, I have put that behind me to concentrate on my recovery. It shouldn't be that way. | even grocery shopping! Really surprised at how little pain I have had in my back, I'd been warned I would experience back pain | a bit further each, just trying not to go too far. | forward to doing so much more than I have been able to |         |                   |        |        |        |                 |

**Non-consecutive week – (16/09/18 – 07/10/18) – 2 weeks difference between wk1 and wk2**

**Diary entry: P25**

| Participant: P25                              | Entry      |                                                                                                                                                               |                                                                                                                                    |         |                                     | Categories/Themes |        |             |         |                  |
|-----------------------------------------------|------------|---------------------------------------------------------------------------------------------------------------------------------------------------------------|------------------------------------------------------------------------------------------------------------------------------------|---------|-------------------------------------|-------------------|--------|-------------|---------|------------------|
| Prompt                                        | Week 1     | Week 2                                                                                                                                                        | Week 3                                                                                                                             | Week 4  | Summary                             | Week 1            | Week 2 | Week 3      | Week 4  | Combined themes  |
| <i>Feelings about your progress this week</i> | Frustrated | It has been a difficult week in regards to progress made. I am still suffering with nerve pain in the foot and leg. this has resulted in a trip to the doctor | It has been a difficult week with the nerve pain overshadowing every thing                                                         | No data | Frustrated because of constant pain | Frustrated        | Pain   | Pain        | No data | Pain Frustration |
| <i>Feelings about your recovery so far</i>    | good       | As above with regards to the nerve pain. The pain round the back and wound has eased                                                                          | Still hopeful of a full recovery, there has been slight improvement in my symptoms. feeling frustrated as was hoping to be further | No data | Hopeful of a full recovery          | Positive (+)      | Pain   | Frustration | No data | Positive Pain    |



| <b>Participant: P25</b>                                 | <b>Entry</b>                            |                                                                                                                                                                                                                                                                                                                                                                                                                                                                                                 |                                                                                                                                                                                                                                                                                                                                                                                                   |               |                                                           | <b>Categories/Themes</b> |                     |                     |               |                           |
|---------------------------------------------------------|-----------------------------------------|-------------------------------------------------------------------------------------------------------------------------------------------------------------------------------------------------------------------------------------------------------------------------------------------------------------------------------------------------------------------------------------------------------------------------------------------------------------------------------------------------|---------------------------------------------------------------------------------------------------------------------------------------------------------------------------------------------------------------------------------------------------------------------------------------------------------------------------------------------------------------------------------------------------|---------------|-----------------------------------------------------------|--------------------------|---------------------|---------------------|---------------|---------------------------|
| <b>Prompt</b>                                           | <b>Week 1</b>                           | <b>Week 2</b>                                                                                                                                                                                                                                                                                                                                                                                                                                                                                   | <b>Week 3</b>                                                                                                                                                                                                                                                                                                                                                                                     | <b>Week 4</b> | <b>Summary</b>                                            | <b>Week 1</b>            | <b>Week 2</b>       | <b>Week 3</b>       | <b>Week 4</b> | <b>Combined themes</b>    |
|                                                         |                                         |                                                                                                                                                                                                                                                                                                                                                                                                                                                                                                 | down the recovery road                                                                                                                                                                                                                                                                                                                                                                            |               |                                                           |                          |                     |                     |               |                           |
| <i>Level of motivation</i>                              | High                                    | Low, tired due to not sleeping during the week.                                                                                                                                                                                                                                                                                                                                                                                                                                                 | . Feeling pretty flat. As frustration seems to be driving everything.                                                                                                                                                                                                                                                                                                                             | No data       | Frustrated by lack of progress                            | Mood                     | Positive (-)        | Frustration         | No data       | Positive Frustration      |
| <i>Symptoms you have experienced over the past week</i> | Back and knee pain                      | Tender feeling in my foot with increased nerve pain in the foot and leg. It has resulted in my mobility being restricted. At times it has resulted in me not being able to tolerate a shoe on the foot.                                                                                                                                                                                                                                                                                         | Back pain seems to be under control with symptoms being stiff back. Nerve pain is still the main issue for me. This goes from the right outer leg into the foot                                                                                                                                                                                                                                   | No data       | Recurrent pain and activities of daily living restricted  | Pain                     | Pain Frustration    | Positive (+)        | No data       | Pain Positive Frustration |
| <i>Medications you have taken this week</i>             | Paracetamol and ibuprofen for knee pain | Amitriptyline 25mg*2 tablets daily<br>Amlodipine 10mg daily<br>Atorstatin 20mg daily<br>Bendroflumethiaide 2.5mgdaily<br>Doxazosin 2mg daily<br>Folic acid 5mg daily except day of injection<br>Hydroxychloroquine 200mg * 2 daiy<br>Naproxen 500mg * 2 daily<br>Pantaprazole 20mg daily<br>Pitzotifen 1.5mg daily<br>Pregablin 75mg *4 twice daily ( increased this week)<br>Ramipril 10mg daily<br>Sulfasalazine 500mg * 3 twice daily<br>Tramadol 50mg *2 three times a day ( increased this | Amitriptyline 25mg*2 tablets daily<br>Amlodipine 10mg daily<br>Atorstatin 20mg daily<br>Bendroflumethiaide 2.5mgdaily<br>Doxazosin 2mg daily<br>Folic acid 5mg daily except day of injection<br>Hydroxychloroquine 200mg * 2 daiy<br>Naproxen 500mg * 2 daily<br>Pantaprazole 20mg daily<br>Pitzotifen 1.5mg daily<br>Pregablin 75mg *4 twice daily ( increased this week)<br>Ramipril 10mg daily | No data       | As prescribed and when needed according to pain threshold | Adherence Awareness      | Adherence Awareness | Adherence Awareness | No data       | Adherence Awareness       |

| Participant: P25                                                                                                                                                           | Entry                                                                                                                   |                                                                                                                                     |                                                                                                                                                                                                                                     |         |                                          | Categories/Themes |          |              |         |                                |
|----------------------------------------------------------------------------------------------------------------------------------------------------------------------------|-------------------------------------------------------------------------------------------------------------------------|-------------------------------------------------------------------------------------------------------------------------------------|-------------------------------------------------------------------------------------------------------------------------------------------------------------------------------------------------------------------------------------|---------|------------------------------------------|-------------------|----------|--------------|---------|--------------------------------|
| Prompt                                                                                                                                                                     | Week 1                                                                                                                  | Week 2                                                                                                                              | Week 3                                                                                                                                                                                                                              | Week 4  | Summary                                  | Week 1            | Week 2   | Week 3       | Week 4  | Combined themes                |
|                                                                                                                                                                            |                                                                                                                         | week) Mirtazapine 15mg daily<br>Methotrexate 20mg inject once per week<br>Oramorph                                                  | Sulfasalazine 500mg * 3 twice daily<br>Tramadol 50mg *2 three times a day ( increased this week)<br>Mirtazapine 15mg daily<br>Methotrexate 20mg inject once per week<br>Oramorph                                                    |         |                                          |                   |          |              |         |                                |
| <i>Healthcare appointments this week</i>                                                                                                                                   | None                                                                                                                    | Appointment at doctors due to nerve pain in foot. Increased tramadol and oramorph. Doctor is ringing in two weeks to check progress | I was due to see the consultant, however two letters came with different dates on, I picked the last one received and it was the wrong one. Took me two hours to get there and the same back. Another appointment has been received | No data | Fragmented follow-up care                | No data           | Access   | Restricted   | No data | Access<br>Restricted           |
| <i>Rehabilitation progress this week</i><br>- <i>Your ability to exercise and do activity this week</i><br><i>Return to work / activities / hobbies as relevant to you</i> | It has been our sale and change over from summer to winter wear which has been a challenge both physically and mentally | Still absent from work. I have tried to mobilise by walking as directed by physio. Last appointment they advised walking only       | Sticking with walking as advised by physio. They advised me to keep my back stiff to allow the plates to set and fuse                                                                                                               | No data | Steady progress                          | Mood              | Anxiety  | Positive (+) | No data | Mood<br>Anxiety<br>Positive    |
| <i>Positive thought(s) this week</i>                                                                                                                                       | Did it                                                                                                                  | That there is a little more feeling in my right foot on three of my toes                                                            | Booked a week away, so depart on 14th October                                                                                                                                                                                       | No data | Steady progress and improved social life | Positive (+)      | Movement | Social       | No data | Positive<br>Movement<br>Social |
| <i>Negative thought(s) this week</i>                                                                                                                                       | But it was too much for me                                                                                              | Although there is feeling in part of the foot, the rest of the foot                                                                 | The feeling of being a failure and a burden, as still not driving. Suffer from                                                                                                                                                      | No data | Surgery and recovery period has had a    | Energy            | Pain     | Emotion      | No data | Energy<br>Pain<br>Emotion      |

| Participant: P25                                                                 | Entry                 |                                                                                                       |                                                                                                                                                                                                                                                                                                                                                                                                       |         |                                               | Categories/Themes      |         |            |         |                 |
|----------------------------------------------------------------------------------|-----------------------|-------------------------------------------------------------------------------------------------------|-------------------------------------------------------------------------------------------------------------------------------------------------------------------------------------------------------------------------------------------------------------------------------------------------------------------------------------------------------------------------------------------------------|---------|-----------------------------------------------|------------------------|---------|------------|---------|-----------------|
| Prompt                                                                           | Week 1                | Week 2                                                                                                | Week 3                                                                                                                                                                                                                                                                                                                                                                                                | Week 4  | Summary                                       | Week 1                 | Week 2  | Week 3     | Week 4  | Combined themes |
|                                                                                  |                       | is feeling more tender and sore.                                                                      | depression and have been in a black hole. It doesn't help as my work friend is away on holiday. Since being off usually phone or call for a coffee with him. The holiday is a lift, however usually book a villa or go to my sister in laws villa, but with me not driving wasn't feasible. Managed to find some nice apartments in a great location. Got to rely on people to take me to the airport |         | negative impact on psychological well-being   |                        |         |            |         |                 |
| <i>Most significant/memorable moment this week (may be positive or negative)</i> | Doing the change over | None                                                                                                  | Improvement in the nerve pain in my foot. The area affected is getting smaller. Think that the oromorph is helping to control this. I have been using morphine just at night. Also been sleeping for longer periods, however still up a big part of the night                                                                                                                                         | No data | Adjusting following surgery and managing pain | Mood                   | No data | Sleep Pain | No data | Sleep Pain      |
| <i>Please describe how this week has been compared to last week</i>              | A lot of challenges   | Difficult to say as there is more feeling in part of the foot, but the rest of the foot is a lot more | Being able to do things without having to think about whether me                                                                                                                                                                                                                                                                                                                                      | No data | Recovery appears to be a challenge            | Depression Frustration | Pain    | Pain       | No data | Pain Emotion    |

| <b>Participant: P25</b>                                                                                                          | <b>Entry</b>  |                                                              |                                                                                               |               |                | <b>Categories/Themes</b> |               |               |               |                        |
|----------------------------------------------------------------------------------------------------------------------------------|---------------|--------------------------------------------------------------|-----------------------------------------------------------------------------------------------|---------------|----------------|--------------------------|---------------|---------------|---------------|------------------------|
| <b>Prompt</b>                                                                                                                    | <b>Week 1</b> | <b>Week 2</b>                                                | <b>Week 3</b>                                                                                 | <b>Week 4</b> | <b>Summary</b> | <b>Week 1</b>            | <b>Week 2</b> | <b>Week 3</b> | <b>Week 4</b> | <b>Combined themes</b> |
|                                                                                                                                  |               | tender. The back area and around the wound is healing nicely | leg's going to be right, or have I got it, have I just twisted it the wrong way or – you know |               |                |                          |               |               |               |                        |
| <i>Please record any other comments you may like to make regarding how you have felt or your experiences over the past week?</i> | None          | None                                                         | None                                                                                          | No data       | No data        | No data                  | No data       | No data       | No data       | No data                |

Non-consecutive week – (14/10/18 – 04/11/18) – 2 weeks difference between wk1 and wk2

Diary entry: P26

| Participant: P26                              | Entry                                                                                                                                                                                                                                                                                                                                                      |                                                                                                                                                                                                                                                                                                                              |         |         | Summary                                                                                                                                  | Categories/Themes |                           |         |         | Combined themes                   |
|-----------------------------------------------|------------------------------------------------------------------------------------------------------------------------------------------------------------------------------------------------------------------------------------------------------------------------------------------------------------------------------------------------------------|------------------------------------------------------------------------------------------------------------------------------------------------------------------------------------------------------------------------------------------------------------------------------------------------------------------------------|---------|---------|------------------------------------------------------------------------------------------------------------------------------------------|-------------------|---------------------------|---------|---------|-----------------------------------|
| Prompt                                        | Week 1                                                                                                                                                                                                                                                                                                                                                     | Week 2                                                                                                                                                                                                                                                                                                                       | Week 3  | Week 4  |                                                                                                                                          | Week 1            | Week 2                    | Week 3  | Week 4  |                                   |
| <i>Feelings about your progress this week</i> | Definitely frustrated. I know this is going to take a long time to recover from, but I'm an active guy and not being able to do the most basic things like do the washing up, or shower without excruciating pain is infuriating. Weirdly it doesn't make me mad or angry                                                                                  | On the whole, I don't really feel like I've changed much since last week. I went to go watch my home town football team on Saturday and that was tough. I wasn't in agony or anything like that, but the driving there, the walking to the stadium and the sitting in the cold for two hours just meant that I was exhausted | No data | No data | Trying to lead a normal life but impeded by constant pain                                                                                | Pain              | Pain<br>Fatigue           | No data | No data | Pain<br>Fatigue                   |
| <i>Feelings about your recovery so far</i>    | My body feels totally different. I worry that what's been done to correct my problem has caused issues with my legs because of the constantly fluctuating pain. I can handle having to walk like an old man for a while, but shaking with pain while I go to the loo is a new experience for me. I hope this gets better quickly. I do drink a lot of tea. | It is what it is. The drugs regime my doctor has me on helps numb the constant pain. I'm mobile enough to go get a pint of milk from the local shop, but I get tired walking up the slight hill. Little things like that mean I'm a bit down about how long this is going to take to be relatively normal,                   | No data | No data | Anxious about procedure and the unintended damage this may have caused. The pain and expected length of time until recovery is stressful | Anxiety<br>Pain   | Stress<br>Anxiety<br>Mood | No data | No data | Stress<br>Anxiety<br>Pain<br>Mood |

| Participant: P26                                        | Entry                                                                                                                                                                                                                                                                                                                                                                                                    |                                                                                                                                                                                                                                                                              |         |         |                                                                                                                                                | Categories/Themes          |              |         |         |                                 |
|---------------------------------------------------------|----------------------------------------------------------------------------------------------------------------------------------------------------------------------------------------------------------------------------------------------------------------------------------------------------------------------------------------------------------------------------------------------------------|------------------------------------------------------------------------------------------------------------------------------------------------------------------------------------------------------------------------------------------------------------------------------|---------|---------|------------------------------------------------------------------------------------------------------------------------------------------------|----------------------------|--------------|---------|---------|---------------------------------|
| Prompt                                                  | Week 1                                                                                                                                                                                                                                                                                                                                                                                                   | Week 2                                                                                                                                                                                                                                                                       | Week 3  | Week 4  | Summary                                                                                                                                        | Week 1                     | Week 2       | Week 3  | Week 4  | Combined themes                 |
|                                                         |                                                                                                                                                                                                                                                                                                                                                                                                          | never mind going back to work.                                                                                                                                                                                                                                               |         |         |                                                                                                                                                |                            |              |         |         |                                 |
| <i>Level of motivation</i>                              | I'm obviously up and down. Better since I ran out of drugs the hospital gave me though. I didn't like how they made me mentally. I'm a fairly positive and determined person in general but like I mentioned before, I'm worried. Will I ever be able to do the things I love again...who knows? My family have been very supportive, and I've suddenly gotten much better at Call of Duty. Every cloud. | It hasn't been as crazy up and down since I changed medication. I've had a lot of visitors this week so it's been largely positive.                                                                                                                                          | No data | No data | Family/friend support, however level of anxiety has not subsided and psychological wellbeing is largely affected by uncertainty about recovery | Anxiety Stress             | Support      | No data | No data | Anxiety Support Stress          |
| <i>Symptoms you have experienced over the past week</i> | I struggle to stand still. I've got a fairly high tolerance for pain and I only managed 13 seconds when I challenged myself in the middle of last week. It takes my breath away. Showering and going to the loo entails some sort of dance. I can imagine it would be quite funny for people to watch. Walking doesn't cause me pain, but my mobility is clearly                                         | I've had a runny nose, a sore throat and general lethargy. That's the cold I got from my little nephew. The sneezing part of it is painful. Suddenly jerking around uncontrollably is not good for my core. In general, the pain is managed by the drugs and it changes from | No data | No data | Generally feeling low in energy and disturbed sleep pattern. Aware of the pain that might be cause by sudden movement                          | Sleep Anxiety Fatigue Mood | Fatigue Pain | No data | No data | Pain Fatigue Anxiety Sleep Mood |

| Participant: P26                            | Entry                                                                                                                                                                                                                                                                                                                                                                                                                                                        |                                                                   |         |         |                                                              | Categories/Themes |                     |         |         |                     |
|---------------------------------------------|--------------------------------------------------------------------------------------------------------------------------------------------------------------------------------------------------------------------------------------------------------------------------------------------------------------------------------------------------------------------------------------------------------------------------------------------------------------|-------------------------------------------------------------------|---------|---------|--------------------------------------------------------------|-------------------|---------------------|---------|---------|---------------------|
| Prompt                                      | Week 1                                                                                                                                                                                                                                                                                                                                                                                                                                                       | Week 2                                                            | Week 3  | Week 4  | Summary                                                      | Week 1            | Week 2              | Week 3  | Week 4  | Combined themes     |
|                                             | limited. It'll take me a while to get used to my new configuration. Sleeping is a nightmare. It always was but now I can't take enough pain relief to get me through the night and I don't have a handy morphine button like post-op. So if I get 3-4 hours in before I'm woken up with fire down my legs then I'm doing well. Which means I'm exhausted throughout the day and with it costing me so much more energy to do anything, I'm simply knackered. | being a nerve pain to being a hip pain.                           |         |         |                                                              |                   |                     |         |         |                     |
| <i>Medications you have taken this week</i> | Tramadol, Gabapentin, Solpadeine, Co-codamol, Codeine, Paracetamol I'm down to just the Solpadeine now. The others I found to be less effective. I mean what's the point of Gabapentin?                                                                                                                                                                                                                                                                      | Solpadeine, Co-codamol, Gabapentin. That's it. Three times a day. | No data | No data | Dependent of the level of pain                               | Awareness         | Awareness Adherence | No data | No data | Awareness Adherence |
| <i>Healthcare appointments this week</i>    | I've had to re-register at the practice I had in Scotland upon my return home. So I won't get to see a                                                                                                                                                                                                                                                                                                                                                       | I've had a repeat prescription made for me over the phone.        | No data | No data | Access to healthcare services is available but this needs to | Anxiety Access    | Access              | No data | No data | Anxiety Access      |

| Participant: P26                                                                                                                                                           | Entry                                                                                                                                                                                                                                                                                                                                                                                                                                                                                                                              |                                                                                                                                                                                                                                                                                                                                                                                                                                                                                                |         |         |                                                    | Categories/Themes            |              |         |         |                              |
|----------------------------------------------------------------------------------------------------------------------------------------------------------------------------|------------------------------------------------------------------------------------------------------------------------------------------------------------------------------------------------------------------------------------------------------------------------------------------------------------------------------------------------------------------------------------------------------------------------------------------------------------------------------------------------------------------------------------|------------------------------------------------------------------------------------------------------------------------------------------------------------------------------------------------------------------------------------------------------------------------------------------------------------------------------------------------------------------------------------------------------------------------------------------------------------------------------------------------|---------|---------|----------------------------------------------------|------------------------------|--------------|---------|---------|------------------------------|
| Prompt                                                                                                                                                                     | Week 1                                                                                                                                                                                                                                                                                                                                                                                                                                                                                                                             | Week 2                                                                                                                                                                                                                                                                                                                                                                                                                                                                                         | Week 3  | Week 4  | Summary                                            | Week 1                       | Week 2       | Week 3  | Week 4  | Combined themes              |
|                                                                                                                                                                            | doctor until next week at the earliest. That'll be fun explaining all of this to the GP                                                                                                                                                                                                                                                                                                                                                                                                                                            |                                                                                                                                                                                                                                                                                                                                                                                                                                                                                                |         |         | be arranged by patients no clear treatment pathway |                              |              |         |         |                              |
| <i>Rehabilitation progress this week</i><br>- <i>Your ability to exercise and do activity this week</i><br><i>Return to work / activities / hobbies as relevant to you</i> | I can walk well enough. Uphill puts me down into first gear, but to the casual observer I think I hide my lack of mobility well. I've been stretching my leg muscles, and trying to relieve nerve tension down my thighs. Playing with my young niece and nephews has been fun, testing and tiring. I've managed to do some basic research and presenting of findings for work. But again, sitting for a long spell with a laptop is a tough ask. I'm a million miles away from being able to do anything physical related to work | Like I said, I've pushed myself with the walking longer distances, and driving. It frustrates me that I get tired so quickly. I work in outdoors/adventure sports, so there is no way I'd be able to return to work or do any of the things I enjoy. Currently my life is:- wake up, eat, watch TV, play playstation, maybe go for a walk, eat, play PlayStation, eat... etc. etc. I'm sure that'll change in the next month or so. Oh I forgot to mention drinking tea. I drink a lot of tea. | No data | No data | Stress<br>Anxiety<br>Mood                          | Stress<br>Anxiety<br>Fatigue |              | No data | No data | Stress<br>Anxiety<br>Fatigue |
| <i>Positive thought(s) this week</i>                                                                                                                                       | I'm walking, and I'm not on so many drugs. That has improved my mood dramatically. I was able to take the kids to the park yesterday. I sat on a bench for                                                                                                                                                                                                                                                                                                                                                                         | I've been fit enough to host friends and play with my niece and nephews. I'm tired. To the bone tired. But it was worth it for all the positive                                                                                                                                                                                                                                                                                                                                                | No data | No data | Some positive and improved psychological wellbeing | Positive (+)                 | Support Mood | No data | No data | Support Mood<br>Positive     |



| <b>Participant: P26</b>                                                          | <b>Entry</b>                                                                                                                                                                                                                 |                                                                                                                                                                                                                                                          |               |               |                                                                             | <b>Categories/Themes</b> |                    |               |               |                         |
|----------------------------------------------------------------------------------|------------------------------------------------------------------------------------------------------------------------------------------------------------------------------------------------------------------------------|----------------------------------------------------------------------------------------------------------------------------------------------------------------------------------------------------------------------------------------------------------|---------------|---------------|-----------------------------------------------------------------------------|--------------------------|--------------------|---------------|---------------|-------------------------|
| <b>Prompt</b>                                                                    | <b>Week 1</b>                                                                                                                                                                                                                | <b>Week 2</b>                                                                                                                                                                                                                                            | <b>Week 3</b> | <b>Week 4</b> | <b>Summary</b>                                                              | <b>Week 1</b>            | <b>Week 2</b>      | <b>Week 3</b> | <b>Week 4</b> | <b>Combined themes</b>  |
|                                                                                  | most of it, but I got myself there and back. Small victories.                                                                                                                                                                | vibes and fun. Plus I got to see my mighty Raith Rovers play for the first time in well over a year.                                                                                                                                                     |               |               |                                                                             |                          |                    |               |               |                         |
| <i>Negative thought(s) this week</i>                                             | When I woke up on Saturday I just wanted to scream and let all the frustration out. I think I was trying to tidy up my bedroom, but in the end I needed to call a friend and she stopped me from spiralling down into tears. | Just that the pain isn't subsiding, and the strength in my core is so pathetic I can't put socks on without some weird Pilates manoeuvre.                                                                                                                | No data       | No data       | Pain and recovery is having a detrimental effect on psychological wellbeing | Mood Frustration         | Pain Energy        | No data       | No data       | Mood Pain Energy        |
| <i>Most significant/memorable moment this week (may be positive or negative)</i> | Trying to stand while making tea. 13 seconds. I was shaking in pain and dizzy from it. But I made that cuppa, and I rewarded myself with a Hob-Nob!                                                                          | I was able to play with my 1 year old nephew for a long time without me being sore or , more importantly, him not crying. That was the breakthrough moment for him and I. Living and working away from them is one of the hardest parts of my lifestyle. | No data       | No data       | Adjusting to life following surgery                                         | Pain Anxiety             | Positive (+)       | No data       | No data       | Positive Anxiety Pain   |
| <i>Please describe how this week has been compared to last week</i>              | Well last week I was mostly off my head on drugs, so ... clearer is the word I would use.                                                                                                                                    | Much the same to be honest. Infinitely better than the week before due to the drugs mostly. They do make the                                                                                                                                             | No data       | No data       | Better management of pain although the drugs are causing side effects such  | Mood Pain                | Pain Fatigue Sleep | No data       | No data       | Mood Pain Fatigue Sleep |

| <b>Participant: P26</b>                                                                                                          | <b>Entry</b>                                                                                                                                       |                                                                                                                                                                                                                                                                                                         |               |               |                                | <b>Categories/Themes</b> |                  |               |               |                                  |
|----------------------------------------------------------------------------------------------------------------------------------|----------------------------------------------------------------------------------------------------------------------------------------------------|---------------------------------------------------------------------------------------------------------------------------------------------------------------------------------------------------------------------------------------------------------------------------------------------------------|---------------|---------------|--------------------------------|--------------------------|------------------|---------------|---------------|----------------------------------|
| <b>Prompt</b>                                                                                                                    | <b>Week 1</b>                                                                                                                                      | <b>Week 2</b>                                                                                                                                                                                                                                                                                           | <b>Week 3</b> | <b>Week 4</b> | <b>Summary</b>                 | <b>Week 1</b>            | <b>Week 2</b>    | <b>Week 3</b> | <b>Week 4</b> | <b>Combined themes</b>           |
|                                                                                                                                  |                                                                                                                                                    | pain manageable, but they also make me quite drowsy. I feel like I could fall asleep at any point in the day.                                                                                                                                                                                           |               |               | as fatigue, drowsiness         |                          |                  |               |               |                                  |
| <i>Please record any other comments you may like to make regarding how you have felt or your experiences over the past week?</i> | You guys doing this survey are the only folks who have checked up on me since I was unceremoniously booted out of the hospital nearly 2 weeks ago. | Overall, this week was a good week. Not because I got any better, but other factors brought happiness and fun to my life. I do wonder every day how long it's going to be before I get to go sailing again, and whether I'll ever be able to snowboard. It's going to be a long old slog of a recovery. | No data       | No data       | Non-existent treatment pathway | Access Frustration       | Positive Anxiety | No data       | No data       | Frustration<br>Access<br>Anxiety |

**Non-consecutive week – (27/01/19 – 24/02/19) – 1-week difference between the two entries**

**Diary entry: P27**

| Participant: P27<br>Prompt                              | Entry                                                                                                                                                                                            |                                                                          |         |         | Summary                                                            | Categories/Themes |           |         |         | Combined themes |
|---------------------------------------------------------|--------------------------------------------------------------------------------------------------------------------------------------------------------------------------------------------------|--------------------------------------------------------------------------|---------|---------|--------------------------------------------------------------------|-------------------|-----------|---------|---------|-----------------|
|                                                         | Week 1                                                                                                                                                                                           | Week 2                                                                   | Week 3  | Week 4  |                                                                    | Week 1            | Week 2    | Week 3  | Week 4  |                 |
| <i>Feelings about your progress this week</i>           | A little. Still taking pain killers for post op pain                                                                                                                                             | Not a lot. Still ache quite a bit and still doing exercises daily        | No data | No data | Pain and trying to cope                                            | Pain              | Pain      | No data | No data | Pain            |
| <i>Feelings about your recovery so far</i>              | Overall very good. I have post op pain but the original symptoms have been dealt with                                                                                                            | Good. The operation worked on the original pain but still hurt every day | No data | No data | Feeling better and pain is gradually subsiding                     | Positive (+)      | Pain      | No data | No data | Positive Pain   |
| <i>Level of motivation</i>                              | 7/10                                                                                                                                                                                             | High                                                                     | No data | No data | High level of motivation                                           | Energy            | Energy    | No data | No data | Energy          |
| <i>Symptoms you have experienced over the past week</i> | Lower back pain when the pain relief wears off and if i walk or stand for too long. Certain very flat shoes make it hurt more. Still wake up during the night in pain when pain relief wears off | Lower rear back pain. Particularly by end of day                         | No data | No data | Managing pain but at times, particularly at night it's distressing | Pain              | Pain      | No data | No data | Pain            |
| <i>Medications you have taken this week</i>             | Cocodamol 30/500 × 1.5 every 6 hours                                                                                                                                                             | Cocodamol 30/500 × 1 4 times a day                                       | No data | No data | As prescribed and dependent on pain threshold                      | Adherence         | Adherence | No data | No data | Adherence       |

| <b>Participant: P27</b>                                                                                                                                                    | <b>Entry</b>                                                                                                                                            |                                                                                                                        |               |               |                                                                                            | <b>Categories/Themes</b> |               |               |               |                        |
|----------------------------------------------------------------------------------------------------------------------------------------------------------------------------|---------------------------------------------------------------------------------------------------------------------------------------------------------|------------------------------------------------------------------------------------------------------------------------|---------------|---------------|--------------------------------------------------------------------------------------------|--------------------------|---------------|---------------|---------------|------------------------|
| <b>Prompt</b>                                                                                                                                                              | <b>Week 1</b>                                                                                                                                           | <b>Week 2</b>                                                                                                          | <b>Week 3</b> | <b>Week 4</b> | <b>Summary</b>                                                                             | <b>Week 1</b>            | <b>Week 2</b> | <b>Week 3</b> | <b>Week 4</b> | <b>Combined themes</b> |
| <i>Healthcare appointments this week</i>                                                                                                                                   | None                                                                                                                                                    | Physio for shoulder and review of back pain. Have said I'll give it a couple more months                               | No data       | No data       | Access to healthcare                                                                       | No data                  | Access        | No data       | No data       | Access                 |
| <i>Rehabilitation progress this week</i><br>- <i>Your ability to exercise and do activity this week</i><br><i>Return to work / activities / hobbies as relevant to you</i> | I continue to do a form of pilates for 20- 25 mins Daily and stretches before work. They are getting easier but I have to be mindful not to overdo them | Back still clicks with exercises. Walking more but still pain                                                          | No data       | No data       | Engaged into structured exercises but conscious of limitation                              | Mobility                 | Pain          | No data       | No data       | Mobility<br>Pain       |
| <i>Positive thought(s) this week</i>                                                                                                                                       | Thinking about a summer holiday and have bought some sturdy walking boots to take                                                                       | Happier life/work balance. Nice new relationship. Booked a week's holiday in June                                      | No data       | No data       | Support from inner circle, feeling psychologically better                                  | Mood                     | Positive (+)  | No data       | No data       | Mood<br>Positive       |
| <i>Negative thought(s) this week</i>                                                                                                                                       | How long will it take before I am pain free and don't have to do daily stretches. Would I undo any of the surgery if I slipped on ice?                  | Why is it still clicking- feels like a ratchet in my lower back. Worried plates/screws are loose. Want to be pain free | No data       | No data       | Still struggling with pain and may have some detrimental effect on psychological wellbeing | Anxiety                  | Anxiety       | No data       | No data       | Anxiety                |
| <i>Most significant/memorable moment this week (may be positive or negative)</i>                                                                                           | My daughter's wedding                                                                                                                                   | Walked 5 KMs                                                                                                           | No data       | No data       | Setting goals and awaiting happy events                                                    | Energy                   | Energy        | No data       | No data       | Energy                 |

| <b>Participant: P27</b>                                                                                                          | <b>Entry</b>                                                                                                                                                                                                                           |               |               |               |                                       | <b>Categories/Themes</b> |               |               |               |                        |
|----------------------------------------------------------------------------------------------------------------------------------|----------------------------------------------------------------------------------------------------------------------------------------------------------------------------------------------------------------------------------------|---------------|---------------|---------------|---------------------------------------|--------------------------|---------------|---------------|---------------|------------------------|
| <b>Prompt</b>                                                                                                                    | <b>Week 1</b>                                                                                                                                                                                                                          | <b>Week 2</b> | <b>Week 3</b> | <b>Week 4</b> | <b>Summary</b>                        | <b>Week 1</b>            | <b>Week 2</b> | <b>Week 3</b> | <b>Week 4</b> | <b>Combined themes</b> |
| <i>Please describe how this week has been compared to last week</i>                                                              | About the same                                                                                                                                                                                                                         | Same          | No data       | No data       | Appears to be getting back to normal  | Positive (+)             | Positive (+)  | No data       | No data       | Positive               |
| <i>Please record any other comments you may like to make regarding how you have felt or your experiences over the past week?</i> | My job is a driving examiner and my employer has kindly bought me a back support to take on tests. Unfortunately i have wrenched my shoulder to avoid an accident on test so finding some exercises difficult – i.e. No weight bearing | No data       | No data       | No data       | Support from workplace is appreciated | Support                  | No data       | No data       | No data       | Support                |

**Diary entry: P28**

| <b>Participant: P28</b>                                 | <b>Entry</b>                    |                                                                                               |                                           |                                               |                                                | <b>Categories/Themes</b> |               |               |               |                        |
|---------------------------------------------------------|---------------------------------|-----------------------------------------------------------------------------------------------|-------------------------------------------|-----------------------------------------------|------------------------------------------------|--------------------------|---------------|---------------|---------------|------------------------|
| <b>Prompt</b>                                           | <b>Week 1</b>                   | <b>Week 2</b>                                                                                 | <b>Week 3</b>                             | <b>Week 4</b>                                 | <b>Summary</b>                                 | <b>Week 1</b>            | <b>Week 2</b> | <b>Week 3</b> | <b>Week 4</b> | <b>Combined themes</b> |
| <i>Feelings about your progress this week</i>           | Progress continues slowly       | Progress continues slowly following last weeks great gain                                     | Slow progress, better than last week      | Feeling better less pain                      | Good progress but feels need more information  | Slow                     | Progress      | Progress      | Feel better   | Slow progress          |
| <i>Feelings about your recovery so far</i>              | Pleased with progress           | Happy but could do with more guidance on exercise.                                            | Please with progress, doing some exercise | Continue to do some exercise, but cautious    | Feeling better and pain is gradually subsiding | Positive (+)             | Pain          | Progress      | Progress      | Positive               |
| <i>Level of motivation</i>                              | OK                              | OK. Wish I knew what exercise to take. Seeing Consultant next week and will raise the subject | Feel better but need some more info       | Better after I have spoken with my consultant | High level of motivation                       | Energy                   | Energy        | Energy        | Energy        | Energy                 |
| <i>Symptoms you have experienced over the past week</i> | General back pain.<br>Tiredness | General back pain.<br>Tiredness                                                               | Persistent pain                           | Pain easing                                   | Managing pain but at times, quite awful        | Pain                     | Pain          | Pain          | Pain          | Pain                   |
| <i>Medications you have taken this week</i>             | Paracetamol                     | Paracetamol                                                                                   | Paracetamol                               | Paracetamol                                   | As prescribed and dependent on pain threshold  | Adherence                | Adherence     | Adherence     | Adherence     | Adherence              |

| <b>Participant: P28</b>                                                                                                                                                    | <b>Entry</b>                                                                                                                                            |                                                            |                             |                        |                                                                                            | <b>Categories/Themes</b> |               |               |               |                        |
|----------------------------------------------------------------------------------------------------------------------------------------------------------------------------|---------------------------------------------------------------------------------------------------------------------------------------------------------|------------------------------------------------------------|-----------------------------|------------------------|--------------------------------------------------------------------------------------------|--------------------------|---------------|---------------|---------------|------------------------|
| <b>Prompt</b>                                                                                                                                                              | <b>Week 1</b>                                                                                                                                           | <b>Week 2</b>                                              | <b>Week 3</b>               | <b>Week 4</b>          | <b>Summary</b>                                                                             | <b>Week 1</b>            | <b>Week 2</b> | <b>Week 3</b> | <b>Week 4</b> | <b>Combined themes</b> |
| <i>Healthcare appointments this week</i>                                                                                                                                   | Specialist 6 week follow up                                                                                                                             | None                                                       | None                        | None                   | Access to healthcare                                                                       | Follow-up                | No access     | No access     | No access     | Access                 |
| <i>Rehabilitation progress this week</i><br>- <i>Your ability to exercise and do activity this week</i><br><i>Return to work / activities / hobbies as relevant to you</i> | Taking it easy with no lifting as directed<br><br>I am advised to take no activity beyond walking and no physiotherapy before next appointment in June! | Taking it easy with no lifting as directed                 | Active but cautious         | Managing better        | Engaged into structured exercises but conscious of limitation                              | Mobility                 | Pain          | Active        | Active        | Mobility<br>Pain       |
| <i>Positive thought(s) this week</i>                                                                                                                                       | Great relief to be making progress on sciatic pain at last                                                                                              | Great relief to be making progress on sciatic pain at last | Slow progress               | Happy with progress    | Support from inner circle, feeling psychologically better                                  | Mood                     | Positive (+)  | Positive (+)  | No data       | Mood<br>Positive       |
| <i>Negative thought(s) this week</i>                                                                                                                                       | Slow progress                                                                                                                                           | When will I return to some normality                       | Getting there but slow      | Will I fully recover   | Still struggling with pain and may have some detrimental effect on psychological wellbeing | Anxiety                  | Anxiety       | Distress      | Distress      | Anxiety<br>Distress    |
| <i>Most significant/memorable moment this week (may be positive or negative)</i>                                                                                           | Less pain I suppose                                                                                                                                     | Engaging better with family                                | Made a cuppa and pot around | Tried flight of stairs | Setting goals and awaiting happy events                                                    | Energy                   | Energy        | Positive (+)  | Energy        | Energy                 |
|                                                                                                                                                                            |                                                                                                                                                         |                                                            |                             |                        |                                                                                            |                          |               |               |               |                        |

| <b>Participant: P28</b>                                                                                                          | <b>Entry</b>                             |                                   |                                    |                                              |                                                | <b>Categories/Themes</b> |               |               |               |                        |
|----------------------------------------------------------------------------------------------------------------------------------|------------------------------------------|-----------------------------------|------------------------------------|----------------------------------------------|------------------------------------------------|--------------------------|---------------|---------------|---------------|------------------------|
| <b>Prompt</b>                                                                                                                    | <b>Week 1</b>                            | <b>Week 2</b>                     | <b>Week 3</b>                      | <b>Week 4</b>                                | <b>Summary</b>                                 | <b>Week 1</b>            | <b>Week 2</b> | <b>Week 3</b> | <b>Week 4</b> | <b>Combined themes</b> |
| <i>Please describe how this week has been compared to last week</i>                                                              | Better                                   | Better than last                  | Getting there I believe            | Lot better                                   | Appears to be getting back to normal           | Positive (+)             | Positive (+)  | Positive (+)  | Positive (+)  | Positive               |
| <i>Please record any other comments you may like to make regarding how you have felt or your experiences over the past week?</i> | A lot of pain but felt surgery went okay | Slow progress and pain not easing | Better and pain is more manageable | Feels better and happy I suppose with myself | Progress was slow but determined to get better | Pain                     | Positive (+)  | Positive (+)  | Positive (+)  | Positive               |
